# Supplementary material for: Comparative Analysis of the Peanut Witches'-Broom Phytoplasma Genome Reveals Horizontal Transfer of Potential Mobile Units and Effectors
Source: PLoS One. 2013 Apr 23;8(4):e62770. doi: 10.1371/journal.pone.0062770 (PMC3633829; doi:10.1371/journal.pone.0062770)
Supplement: Table S2 — List of homologous gene clusters. List of homologous gene clusters in the five available phytoplasma genomes. (XLS) [file pone.0062770.s002.xls]

## Sheet: Sheet1
Cluster_id	Genome_id	Locus_tag	Contig	Order	Start	End	Size	Strand	Gene	Description	KEGG	COG	COG_cat	COG_desc
0	CaPastA	YP_456406	NC_007716	210	224084	224374	291	1	himA	DNA-binding protein HU	K03530	COG0776	L	Bacterial nucleoid DNA-binding protein
0	CaPastA	YP_456426	NC_007716	230	241904	242194	291	-1	himA	DNA-binding protein HU	K03530	COG0776	L	Bacterial nucleoid DNA-binding protein
0	CaPastA	YP_456573	NC_007716	377	391111	391401	291	-1	himA	DNA-binding protein HU	K03530	COG0776	L	Bacterial nucleoid DNA-binding protein
0	CaPastO	NP_950295	NC_005303	43	55120	55410	291	1	himA	bacterial nucleoid DNA-binding protein	K03530	COG0776	L	Bacterial nucleoid DNA-binding protein
0	CaPastO	NP_950315	NC_005303	63	83594	83884	291	1	himA	bacterial nucleoid DNA-binding protein	K03530	COG0776	L	Bacterial nucleoid DNA-binding protein
0	CaPastO	NP_950569	NC_005303	316	365361	365651	291	-1	himA	bacterial nucleoid DNA-binding protein	K03530	COG0776	L	Bacterial nucleoid DNA-binding protein
0	CaPastO	NP_950577	NC_005303	324	370495	370785	291	1	himA	bacterial nucleoid DNA-binding protein	K03530	COG0776	L	Bacterial nucleoid DNA-binding protein
0	CaPastO	NP_950609	NC_005303	356	406254	406544	291	-1	himA	bacterial nucleoid DNA-binding protein	K03530	COG0776	L	Bacterial nucleoid DNA-binding protein
0	CaPastO	NP_950617	NC_005303	364	411388	411678	291	1	himA	bacterial nucleoid DNA-binding protein	K03530	COG0776	L	Bacterial nucleoid DNA-binding protein
0	CaPastO	NP_950646	NC_005303	393	440557	440847	291	-1	himA	bacterial nucleoid DNA-binding protein	K03530	COG0776	L	Bacterial nucleoid DNA-binding protein
0	CaPastO	NP_950654	NC_005303	401	445899	446189	291	1	himA	bacterial nucleoid DNA-binding protein	K03530	COG0776	L	Bacterial nucleoid DNA-binding protein
0	CaPastO	NP_950765	NC_005303	509	578883	579173	291	1	himA	bacterial nucleoid DNA-binding protein	K03530	COG0776	L	Bacterial nucleoid DNA-binding protein
0	CaPastO	NP_950815	NC_005303	559	630574	630864	291	-1	himA	bacterial nucleoid DNA-binding protein	K03530	COG0776	L	Bacterial nucleoid DNA-binding protein
0	CaPastO	NP_950906	NC_005303	649	741367	741657	291	-1	himA	bacterial nucleoid DNA-binding protein	K03530	COG0776	L	Bacterial nucleoid DNA-binding protein
0	CaPaus	YP_001798741	NC_010544	31	44540	44857	318	1	himA	DNA-binding protein HU	NA	NA	X	NA
0	CaPaus	YP_001798759	NC_010544	49	78259	78576	318	-1	himA	DNA-binding protein HU	NA	NA	X	NA
0	CaPaus	YP_001798868	NC_010544	158	234976	235266	291	1	himA	DNA-binding protein HU	K03530	COG0776	L	Bacterial nucleoid DNA-binding protein
0	CaPaus	YP_001798896	NC_010544	186	269253	269543	291	1	himA	DNA-binding protein HU	K03530	COG0776	L	Bacterial nucleoid DNA-binding protein
0	CaPaus	YP_001798947	NC_010544	237	343220	343510	291	-1	himA	DNA-binding protein HU	K03530	COG0776	L	Bacterial nucleoid DNA-binding protein
0	CaPaus	YP_001798993	NC_010544	283	386111	386428	318	1	himA	DNA-binding protein HU	NA	NA	X	NA
0	CaPaus	YP_001799029	NC_010544	319	423636	423926	291	-1	himA	DNA-binding protein HU	K03530	COG0776	L	Bacterial nucleoid DNA-binding protein
0	CaPaus	YP_001799036	NC_010544	326	429496	429786	291	1	himA	DNA-binding protein HU	K03530	COG0776	L	Bacterial nucleoid DNA-binding protein
0	CaPaus	YP_001799306	NC_010544	596	750882	751199	318	1	huP	DNA-binding protein HU	NA	NA	X	NA
0	CaPaus	YP_001799360	NC_010544	650	826737	827027	291	-1	huP	DNA-binding protein HU	K03530	COG0776	L	Bacterial nucleoid DNA-binding protein
0	PNWB_v1	c0500	Contig1B	13	17913	18296	384	1	himA	DNA-binding protein HU	K03530	COG0776	L	Bacterial nucleoid DNA-binding protein
1	CaPastA	YP_456389	NC_007716	193	214448	214762	315	-1	ssb	single-stranded DNA binding protein	K03111	COG0629	L	Single-stranded DNA-binding protein
1	CaPastA	YP_456428	NC_007716	232	242377	242712	336	-1	ssb	single-stranded DNA binding protein	K03111	COG0629	L	Single-stranded DNA-binding protein
1	CaPastA	YP_456467	NC_007716	271	287614	287928	315	1	ssb	single-stranded DNA binding protein	K03111	COG0629	L	Single-stranded DNA-binding protein
1	CaPastA	YP_456574	NC_007716	378	391582	391917	336	-1	ssb	single-stranded DNA binding protein	K03111	COG0629	L	Single-stranded DNA-binding protein
1	CaPastO	NP_950293	NC_005303	41	53544	53873	330	1	ssb	single-stranded DNA-binding protein	K03111	COG0629	L	Single-stranded DNA-binding protein
1	CaPastO	NP_950571	NC_005303	318	366900	367229	330	-1	ssb	single-stranded DNA-binding protein	K03111	COG0629	L	Single-stranded DNA-binding protein
1	CaPastO	NP_950576	NC_005303	323	370112	370441	330	1	ssb	single-stranded DNA-binding protein	K03111	COG0629	L	Single-stranded DNA-binding protein
1	CaPastO	NP_950611	NC_005303	358	407793	408122	330	-1	ssb	single-stranded DNA-binding protein	K03111	COG0629	L	Single-stranded DNA-binding protein
1	CaPastO	NP_950616	NC_005303	363	411005	411334	330	1	ssb	single-stranded DNA-binding protein	K03111	COG0629	L	Single-stranded DNA-binding protein
1	CaPastO	NP_950648	NC_005303	395	442093	442422	330	-1	ssb	single-stranded DNA-binding protein	K03111	COG0629	L	Single-stranded DNA-binding protein
1	CaPastO	NP_950662	NC_005303	409	455138	455473	336	1	ssb	single-stranded DNA-binding protein	K03111	COG0629	L	Single-stranded DNA-binding protein
1	CaPastO	NP_950764	NC_005303	508	578517	578846	330	1	ssb	single-stranded DNA-binding protein	K03111	COG0629	L	Single-stranded DNA-binding protein
1	CaPastO	NP_950816	NC_005303	560	631045	631380	336	-1	ssb	single-stranded DNA-binding protein	K03111	COG0629	L	Single-stranded DNA-binding protein
1	CaPastO	NP_950907	NC_005303	650	741787	742131	345	-1	ssb	single-stranded DNA-binding protein	K03111	COG0629	L	Single-stranded DNA-binding protein
1	CaPastO	NP_950978	NC_005303	721	818238	818567	330	1	ssb	single-stranded DNA-binding protein	K03111	COG0629	L	Single-stranded DNA-binding protein
1	CaPastO	YP_002154419	NC_005303	423	468563	468877	315	-1	ssb	single-stranded DNA-binding protein	K03111	COG0629	L	Single-stranded DNA-binding protein
1	CaPaus	YP_001798943	NC_010544	233	340603	340914	312	1	NA	Putative prophage-derived single-strand DNA-binding protein	K03111	COG0629	L	Single-stranded DNA-binding protein
1	CaPaus	YP_001799020	NC_010544	310	410206	410517	312	-1	NA	Single-strand DNA-binding protein of phage	K03111	COG0629	L	Single-stranded DNA-binding protein
1	CaPaus	YP_001799297	NC_010544	587	740133	740444	312	1	NA	Single-strand DNA-binding protein of phage	K03111	COG0629	L	Single-stranded DNA-binding protein
1	CaPaus	YP_001799348	NC_010544	638	813209	813520	312	1	NA	Single-strand DNA-binding protein of phage	K03111	COG0629	L	Single-stranded DNA-binding protein
1	CaPaus	YP_001799369	NC_010544	659	833664	833975	312	-1	NA	Single-strand DNA-binding protein of phage	K03111	COG0629	L	Single-stranded DNA-binding protein
1	CaPmal	YP_002004429	NC_011047	387	478616	478924	309	1	ssb	ssDNA-binding protein	K03111	COG0629	L	Single-stranded DNA-binding protein
1	PNWB_v1	c0480	Contig1B	12	16490	16834	345	1	ssb1	single-stranded DNA-binding protein	K03111	COG0629	L	Single-stranded DNA-binding protein
2	CaPastA	YP_456387	NC_007716	191	213419	213859	441	-1	NA	hypothetical protein	NA	NA	X	NA
2	CaPastA	YP_456469	NC_007716	273	288516	288959	444	1	NA	hypothetical protein	NA	NA	X	NA
2	CaPastO	NP_950785	NC_005303	529	601518	601892	375	-1	NA	hypothetical protein	NA	NA	X	NA
2	CaPastO	NP_950949	NC_005303	692	789973	790416	444	-1	NA	hypothetical protein	NA	NA	X	NA
2	CaPaus	YP_001798744	NC_010544	34	45903	46343	441	1	NA	hypothetical protein	NA	NA	X	NA
2	CaPaus	YP_001798871	NC_010544	161	236294	236734	441	1	NA	hypothetical protein	NA	NA	X	NA
2	CaPaus	YP_001798899	NC_010544	189	270571	271011	441	1	NA	hypothetical protein	NA	NA	X	NA
2	CaPaus	YP_001798906	NC_010544	196	281632	282072	441	-1	NA	hypothetical protein	NA	NA	X	NA
2	CaPaus	YP_001798957	NC_010544	247	349903	350343	441	1	NA	hypothetical protein	NA	NA	X	NA
2	CaPaus	YP_001798961	NC_010544	251	351452	351892	441	1	NA	hypothetical protein	NA	NA	X	NA
2	CaPaus	YP_001798995	NC_010544	285	387522	387962	441	1	NA	hypothetical protein	NA	NA	X	NA
2	CaPaus	YP_001799005	NC_010544	295	401396	401836	441	-1	NA	hypothetical protein	NA	NA	X	NA
2	CaPaus	YP_001799009	NC_010544	299	402946	403386	441	-1	NA	hypothetical protein	NA	NA	X	NA
2	CaPaus	YP_001799026	NC_010544	316	422167	422607	441	-1	NA	hypothetical protein	NA	NA	X	NA
2	CaPaus	YP_001799039	NC_010544	329	430832	431272	441	1	NA	hypothetical protein	NA	NA	X	NA
2	CaPaus	YP_001799309	NC_010544	599	752245	752685	441	1	NA	hypothetical protein	NA	NA	X	NA
2	CaPaus	YP_001799357	NC_010544	647	825269	825709	441	-1	NA	hypothetical protein	NA	NA	X	NA
3	CaPastA	YP_456429	NC_007716	233	242894	243499	606	-1	rpoD	RNA polymerase sigma factor	NA	NA	X	NA
3	CaPastA	YP_456576	NC_007716	380	393185	393619	435	-1	rpoD	RNA polymerase sigma factor	NA	NA	X	NA
3	CaPastO	NP_950292	NC_005303	40	52707	53312	606	1	fliA	DNA-directed RNA polymerase specialized sigma	K03091	NA	X	NA
3	CaPastO	NP_950572	NC_005303	319	367444	368073	630	-1	fliA	DNA-directed RNA polymerase specialized sigma	K03091	NA	X	NA
3	CaPastO	NP_950575	NC_005303	322	369487	370107	621	1	fliA	DNA-directed RNA polymerase specialized sigma	NA	NA	X	NA
3	CaPastO	NP_950612	NC_005303	359	408337	408966	630	-1	fliA	DNA-directed RNA polymerase specialized sigma	K03091	NA	X	NA
3	CaPastO	NP_950615	NC_005303	362	410380	411000	621	1	fliA	DNA-directed RNA polymerase specialized sigma	NA	NA	X	NA
3	CaPastO	NP_950660	NC_005303	407	453299	453898	600	1	rpoD	DNA-directed RNA polymerase sigma subunit	NA	NA	X	NA
3	CaPastO	NP_950763	NC_005303	507	577680	578285	606	1	fliA	DNA-directed RNA polymerase specialized sigma	K03091	NA	X	NA
3	CaPastO	NP_950788	NC_005303	532	602938	603624	687	-1	fliA	DNA-directed RNA polymerase specialized sigma	NA	NA	X	NA
3	CaPastO	NP_950908	NC_005303	651	742394	742996	603	-1	fliA	DNA-directed RNA polymerase specialized sigma	NA	NA	X	NA
3	CaPastO	NP_950952	NC_005303	695	791462	792148	687	-1	fliA	DNA-directed RNA polymerase specialized sigma	NA	NA	X	NA
3	CaPaus	YP_001798805	NC_010544	95	145183	145557	375	-1	NA	RNA polymerase sigma factor	NA	NA	X	NA
3	CaPaus	YP_001798916	NC_010544	206	289236	289691	456	-1	NA	RNA polymerase sigma factor	K03091	NA	X	NA
3	CaPmal	YP_002004428	NC_011047	386	477627	478442	816	1	fliA3	DNA-directed RNA polymerase specialized sigma subunit	NA	NA	X	NA
3	PNWB_v1	c0470	Contig1B	11	15888	16490	603	1	fliA	DNA-directed RNA polymerase sigma factor	K03091	NA	X	NA
4	CaPastA	YP_456374	NC_007716	178	199582	200907	1326	-1	dnaG	DNA primase	K02316	COG0358	L	DNA primase (bacterial type)
4	CaPastA	YP_456415	NC_007716	219	230627	231952	1326	-1	dnaG	DNA primase	K02316	COG0358	L	DNA primase (bacterial type)
4	CaPastA	YP_456481	NC_007716	285	299694	301019	1326	1	dnaG	DNA primase	K02316	COG0358	L	DNA primase (bacterial type)
4	CaPastA	YP_456812	NC_007716	616	638123	639232	1110	-1	dnaG	DNA primase	NA	NA	X	NA
4	CaPastO	NP_950327	NC_005303	75	95046	95924	879	1	NA	hypothetical protein	NA	NA	X	NA
4	CaPastO	NP_950639	NC_005303	386	432561	433439	879	-1	NA	hypothetical protein	NA	NA	X	NA
4	CaPastO	NP_950776	NC_005303	520	589785	591110	1326	1	dnaG	DNA primase	K02316	COG0358	L	DNA primase (bacterial type)
4	CaPastO	NP_950801	NC_005303	545	614937	616262	1326	-1	dnaG	DNA primase	NA	NA	X	NA
4	CaPastO	NP_950821	NC_005303	565	636788	638113	1326	-1	dnaG	DNA primase	K02316	COG0358	L	DNA primase (bacterial type)
4	CaPastO	NP_950824	NC_005303	568	640891	642216	1326	1	dnaG	DNA primase	NA	NA	X	NA
4	CaPastO	NP_950896	NC_005303	639	729934	731166	1233	-1	dnaG	DNA primase	NA	NA	X	NA
4	CaPastO	NP_950937	NC_005303	680	777846	779171	1326	-1	dnaG	DNA primase	NA	NA	X	NA
4	CaPaus	YP_001798980	NC_010544	270	372576	374372	1797	-1	NA	DNA primase	K02316	COG0358	L	DNA primase (bacterial type)
4	CaPmal	YP_002004445	NC_011047	403	492456	493628	1173	1	dnaG2	DNA primase	K02316	COG0358	L	DNA primase (bacterial type)
4	PNWB_v1	c0630	Contig1B	24	28935	30260	1326	1	dnaG2	DNA primase	NA	NA	X	NA
5	CaPastA	YP_456375	NC_007716	179	200933	202429	1497	-1	dnaB	replicative DNA helicase	NA	NA	X	NA
5	CaPastA	YP_456416	NC_007716	220	231977	233473	1497	-1	dnaB	replicative DNA helicase	NA	NA	X	NA
5	CaPastA	YP_456480	NC_007716	284	298166	299668	1503	1	dnaB	replicative DNA helicase	K02314	COG0305	L	Replicative DNA helicase
5	CaPastA	YP_456813	NC_007716	617	639554	640969	1416	-1	dnaB	replicative DNA helicase	NA	NA	X	NA
5	CaPastO	NP_950326	NC_005303	74	93535	95034	1500	1	dnaB	replicative DNA helicase	NA	NA	X	NA
5	CaPastO	NP_950640	NC_005303	387	433451	434944	1494	-1	dnaB	replicative DNA helicase	NA	NA	X	NA
5	CaPastO	NP_950775	NC_005303	519	588275	589774	1500	1	dnaB	replicative DNA helicase	NA	NA	X	NA
5	CaPastO	NP_950802	NC_005303	546	616287	617783	1497	-1	dnaB	replicative DNA helicase	NA	NA	X	NA
5	CaPastO	NP_950822	NC_005303	566	638138	639634	1497	-1	dnaB	replicative DNA helicase	NA	NA	X	NA
5	CaPastO	NP_950897	NC_005303	640	731179	732672	1494	-1	dnaB	replicative DNA helicase	NA	NA	X	NA
5	CaPastO	NP_950938	NC_005303	681	779198	780697	1500	-1	dnaB	replicative DNA helicase	K02314	COG0305	L	Replicative DNA helicase
5	CaPaus	YP_001798981	NC_010544	271	374384	375883	1500	-1	dnaB	Replicative DNA helicase	NA	NA	X	NA
5	CaPmal	YP_002004450	NC_011047	408	496537	497988	1452	1	NA	replicative DNA helicase	K02314	COG0305	L	Replicative DNA helicase
5	PNWB_v1	c0620	Contig1B	23	27015	28517	1503	1	dnaB3	replicative DNA helicase	NA	NA	X	NA
6	CaPastA	YP_456344	NC_007716	148	175810	176502	693	1	NA	hypothetical protein	NA	NA	X	NA
6	CaPastA	YP_456465	NC_007716	269	285462	286169	708	1	NA	hypothetical protein	NA	NA	X	NA
6	CaPastA	YP_456832	NC_007716	636	665002	665757	756	1	NA	hypothetical protein	NA	NA	X	NA
6	CaPastO	NP_950652	NC_005303	399	444994	445443	450	1	NA	hypothetical protein	NA	NA	X	NA
6	CaPaus	YP_001798740	NC_010544	30	44092	44547	456	1	NA	hypothetical protein	NA	NA	X	NA
6	CaPaus	YP_001798832	NC_010544	122	182702	183595	894	1	NA	hypothetical protein	NA	NA	X	NA
6	CaPaus	YP_001798867	NC_010544	157	234522	234983	462	1	NA	hypothetical protein	NA	NA	X	NA
6	CaPaus	YP_001798895	NC_010544	185	268799	269260	462	1	NA	hypothetical protein	NA	NA	X	NA
6	CaPaus	YP_001798909	NC_010544	199	282847	283302	456	-1	NA	hypothetical protein	NA	NA	X	NA
6	CaPaus	YP_001798948	NC_010544	238	343503	343964	462	-1	NA	hypothetical protein	NA	NA	X	NA
6	CaPaus	YP_001798992	NC_010544	282	385663	386118	456	1	NA	hypothetical protein	NA	NA	X	NA
6	CaPaus	YP_001799030	NC_010544	320	423919	424380	462	-1	NA	hypothetical protein	NA	NA	X	NA
6	CaPaus	YP_001799361	NC_010544	651	827020	827481	462	-1	NA	hypothetical protein	NA	NA	X	NA
6	CaPaus	YP_001799385	NC_010544	675	867434	868447	1014	-1	NA	hypothetical protein fragment	NA	NA	X	NA
7	CaPastA	YP_456425	NC_007716	229	239562	241868	2307	-1	hflB	ATP-dependent Zn protease	NA	NA	X	NA
7	CaPastO	NP_950297	NC_005303	45	56624	57805	1182	1	NA	hypothetical protein	NA	NA	X	NA
7	CaPastO	NP_950316	NC_005303	64	84325	86229	1905	1	hflB	ATP-dependent Zn protease	NA	NA	X	NA
7	CaPastO	NP_950568	NC_005303	315	363945	365318	1374	-1	hflB	ATP-dependent Zn protease	NA	NA	X	NA
7	CaPastO	NP_950578	NC_005303	325	370828	372378	1551	1	hflB	ATP-dependent Zn protease	NA	NA	X	NA
7	CaPastO	NP_950608	NC_005303	355	404838	406211	1374	-1	hflB	ATP-dependent Zn protease	NA	NA	X	NA
7	CaPastO	NP_950618	NC_005303	365	411721	413271	1551	1	hflB	ATP-dependent Zn protease	NA	NA	X	NA
7	CaPastO	NP_950645	NC_005303	392	438220	440514	2295	-1	hflB	ATP-dependent Zn protease	NA	NA	X	NA
7	CaPastO	NP_950655	NC_005303	402	446232	448592	2361	1	hflB	ATP-dependent Zn protease	NA	NA	X	NA
7	CaPastO	NP_950766	NC_005303	510	579216	581006	1791	1	NA	hypothetical protein	NA	NA	X	NA
7	CaPastO	NP_950905	NC_005303	648	739442	741295	1854	-1	NA	hypothetical protein	NA	NA	X	NA
7	CaPastO	NP_950979	NC_005303	722	819036	820409	1374	1	hflB	ATP-dependent Zn protease	NA	NA	X	NA
7	PNWB_v1	c0510	Contig1B	14	18339	20639	2301	1	hflB1	ATP-dependent Zn protease	NA	NA	X	NA
8	CaPastA	YP_456372	NC_007716	176	197706	198332	627	-1	NA	hypothetical protein	NA	NA	X	NA
8	CaPastA	YP_456482	NC_007716	286	301055	301807	753	1	NA	hypothetical protein	NA	NA	X	NA
8	CaPastA	YP_456559	NC_007716	363	382120	382746	627	1	NA	hypothetical protein	NA	NA	X	NA
8	CaPastO	NP_950638	NC_005303	385	431345	431971	627	-1	NA	hypothetical protein	NA	NA	X	NA
8	CaPastO	NP_950659	NC_005303	406	451784	452338	555	-1	NA	hypothetical protein	NA	NA	X	NA
8	CaPastO	NP_950777	NC_005303	521	591130	591768	639	1	NA	hypothetical protein	NA	NA	X	NA
8	CaPastO	NP_950825	NC_005303	569	642357	642983	627	1	NA	hypothetical protein	NA	NA	X	NA
8	CaPastO	NP_950936	NC_005303	679	777057	777686	630	-1	NA	hypothetical protein	NA	NA	X	NA
8	CaPaus	YP_001798931	NC_010544	221	321435	322040	606	-1	NA	hypothetical protein	NA	NA	X	NA
8	CaPaus	YP_001798975	NC_010544	265	368817	369422	606	-1	NA	hypothetical protein	NA	NA	X	NA
8	CaPaus	YP_001799294	NC_010544	584	737750	738355	606	-1	NA	hypothetical protein	NA	NA	X	NA
8	PNWB_v1	c0640	Contig1B	25	30382	31011	630	1	NA	phase variable surface lipoprotein	NA	NA	X	NA
9	CaPastA	YP_456383	NC_007716	187	209263	211371	2109	-1	hflB	ATP-dependent Zn protease	NA	NA	X	NA
9	CaPastA	YP_456471	NC_007716	275	289308	291455	2148	1	hflB	ATP-dependent Zn protease	NA	NA	X	NA
9	CaPastA	YP_456605	NC_007716	409	418730	420835	2106	-1	hflB	ATP-dependent Zn protease	NA	NA	X	NA
9	CaPastO	NP_950784	NC_005303	528	599487	601100	1614	-1	NA	hypothetical protein	NA	NA	X	NA
9	CaPastO	NP_950947	NC_005303	690	787477	788985	1509	-1	hflB	ATP-dependent Zn protease	NA	NA	X	NA
9	CaPaus	YP_001798746	NC_010544	36	46774	48894	2121	1	NA	Putative IMP dehydrogenase/GMP reductase	NA	NA	X	NA
9	CaPaus	YP_001798757	NC_010544	47	75483	77549	2067	-1	NA	Putative IMP dehydrogenase/GMP reductase	NA	NA	X	NA
9	CaPaus	YP_001798873	NC_010544	163	237165	239306	2142	1	NA	Putative IMP dehydrogenase/GMP reductase	NA	NA	X	NA
9	CaPaus	YP_001798901	NC_010544	191	271442	273583	2142	1	NA	Putative IMP dehydrogenase/GMP reductase	NA	NA	X	NA
9	CaPaus	YP_001798997	NC_010544	287	388394	390520	2127	1	NA	Putative IMP dehydrogenase/GMP reductase	NA	NA	X	NA
9	CaPaus	YP_001799024	NC_010544	314	419596	421737	2142	-1	NA	Putative IMP dehydrogenase/GMP reductase	NA	NA	X	NA
9	CaPaus	YP_001799355	NC_010544	645	822721	824838	2118	-1	NA	Putative IMP dehydrogenase/GMP reductase	NA	NA	X	NA
10	CaPaus	YP_001798742	NC_010544	32	44881	45558	678	1	NA	Putative N6 adenine-specific DNA methyltransferase	NA	NA	X	NA
10	CaPaus	YP_001798758	NC_010544	48	77558	78235	678	-1	NA	Putative N6 adenine-specific DNA methyltransferase	NA	NA	X	NA
10	CaPaus	YP_001798869	NC_010544	159	235290	235967	678	1	NA	Putative N6 adenine-specific DNA methyltransferase	NA	NA	X	NA
10	CaPaus	YP_001798897	NC_010544	187	269567	270244	678	1	NA	Putative N6 adenine-specific DNA methyltransferase	NA	NA	X	NA
10	CaPaus	YP_001798946	NC_010544	236	342519	343196	678	-1	NA	Putative N6 adenine-specific DNA methyltransferase fragment	NA	NA	X	NA
10	CaPaus	YP_001798953	NC_010544	243	347142	347780	639	1	NA	Putative N6 adenine-specific DNA methyltransferase fragment	NA	NA	X	NA
10	CaPaus	YP_001798994	NC_010544	284	386452	387090	639	1	NA	Putative N6 adenine-specific DNA methyltransferase, probably truncated	NA	NA	X	NA
10	CaPaus	YP_001799028	NC_010544	318	422934	423611	678	-1	NA	Putative N6 adenine-specific DNA methyltransferase	NA	NA	X	NA
10	CaPaus	YP_001799037	NC_010544	327	429810	430487	678	1	NA	Putative N6 adenine-specific DNA methyltransferase	NA	NA	X	NA
10	CaPaus	YP_001799307	NC_010544	597	751223	751900	678	1	NA	Putative N6 adenine-specific DNA methyltransferase	NA	NA	X	NA
10	CaPaus	YP_001799337	NC_010544	627	798047	798676	630	-1	NA	Putative N6 adenine-specific DNA methyltransferase, probably truncated	NA	NA	X	NA
10	CaPaus	YP_001799359	NC_010544	649	826036	826713	678	-1	NA	Putative N6 adenine-specific DNA methyltransferase	NA	NA	X	NA
11	CaPaus	YP_001798745	NC_010544	35	46336	46572	237	1	NA	hypothetical protein	NA	NA	X	NA
11	CaPaus	YP_001798862	NC_010544	152	231107	231343	237	-1	NA	hypothetical protein	NA	NA	X	NA
11	CaPaus	YP_001798872	NC_010544	162	236727	236963	237	1	NA	hypothetical protein	NA	NA	X	NA
11	CaPaus	YP_001798900	NC_010544	190	271004	271240	237	1	NA	hypothetical protein	NA	NA	X	NA
11	CaPaus	YP_001798905	NC_010544	195	281403	281639	237	-1	NA	hypothetical protein	NA	NA	X	NA
11	CaPaus	YP_001798962	NC_010544	252	351885	352118	234	1	NA	hypothetical protein	NA	NA	X	NA
11	CaPaus	YP_001798996	NC_010544	286	387955	388191	237	1	NA	hypothetical protein	NA	NA	X	NA
11	CaPaus	YP_001799004	NC_010544	294	401170	401403	234	-1	NA	hypothetical protein	NA	NA	X	NA
11	CaPaus	YP_001799025	NC_010544	315	421938	422174	237	-1	NA	hypothetical protein	NA	NA	X	NA
11	CaPaus	YP_001799040	NC_010544	330	431265	431501	237	1	NA	hypothetical protein	NA	NA	X	NA
11	CaPaus	YP_001799310	NC_010544	600	752678	752914	237	1	NA	hypothetical protein	NA	NA	X	NA
11	CaPaus	YP_001799356	NC_010544	646	825040	825276	237	-1	NA	hypothetical protein	NA	NA	X	NA
12	CaPastA	YP_456419	NC_007716	223	234979	235608	630	-1	NA	hypothetical protein	NA	NA	X	NA
12	CaPastO	NP_950323	NC_005303	71	91415	92062	648	1	NA	hypothetical protein	NA	NA	X	NA
12	CaPastO	NP_950597	NC_005303	344	392276	392905	630	-1	NA	hypothetical protein	NA	NA	X	NA
12	CaPastO	NP_950643	NC_005303	390	436440	437078	639	-1	NA	hypothetical protein	NA	NA	X	NA
12	CaPastO	NP_950772	NC_005303	516	586183	586833	651	1	NA	hypothetical protein	NA	NA	X	NA
12	CaPastO	NP_950795	NC_005303	539	608014	608664	651	1	NA	hypothetical protein	NA	NA	X	NA
12	CaPastO	NP_950900	NC_005303	643	734168	734806	639	-1	NA	hypothetical protein	NA	NA	X	NA
12	CaPaus	YP_001798954	NC_010544	244	348114	348749	636	1	NA	Putative phage-related protein (endonuclease)	NA	NA	X	NA
12	CaPaus	YP_001799012	NC_010544	302	404540	405175	636	-1	NA	Putative phage-related protein (endonuclease)	NA	NA	X	NA
12	CaPmal	YP_002004433	NC_011047	391	480571	481203	633	1	NA	phage protein	NA	NA	X	NA
12	PNWB_v1	c0570	Contig1B	20	24886	25527	642	1	NA	phage-related protein	NA	NA	X	NA
13	CaPastA	YP_456479	NC_007716	283	297537	298148	612	1	NA	hypothetical protein	NA	NA	X	NA
13	CaPastO	NP_950939	NC_005303	682	780715	781326	612	-1	NA	hypothetical protein	NA	NA	X	NA
13	CaPaus	YP_001798737	NC_010544	27	42546	43178	633	1	NA	hypothetical protein	NA	NA	X	NA
13	CaPaus	YP_001798864	NC_010544	154	232976	233608	633	1	NA	hypothetical protein	NA	NA	X	NA
13	CaPaus	YP_001798892	NC_010544	182	267253	267885	633	1	NA	hypothetical protein	NA	NA	X	NA
13	CaPaus	YP_001798951	NC_010544	241	344878	345510	633	-1	NA	hypothetical protein	NA	NA	X	NA
13	CaPaus	YP_001798989	NC_010544	279	384117	384749	633	1	NA	hypothetical protein	NA	NA	X	NA
13	CaPaus	YP_001799033	NC_010544	323	425294	425926	633	-1	NA	hypothetical protein	NA	NA	X	NA
13	CaPaus	YP_001799034	NC_010544	324	428211	428843	633	1	NA	hypothetical protein	NA	NA	X	NA
13	CaPaus	YP_001799364	NC_010544	654	828395	829027	633	-1	NA	hypothetical protein	NA	NA	X	NA
13	PNWB_v1	c0610	Contig1B	22	26385	27008	624	1	NA	hypothetical protein	NA	NA	X	NA
14	CaPastA	YP_456281	NC_007716	85	93819	96935	3117	1	uvrD	UvrD helicase	NA	NA	X	NA
14	CaPastA	YP_456462	NC_007716	266	282167	283462	1296	1	NA	hypothetical protein	NA	NA	X	NA
14	CaPastO	NP_950303	NC_005303	51	62166	63443	1278	1	NA	hypothetical protein	NA	NA	X	NA
14	CaPastO	NP_950304	NC_005303	52	63851	65281	1431	1	NA	hypothetical protein	NA	NA	X	NA
14	CaPastO	NP_950567	NC_005303	314	360616	363732	3117	1	uvrD	ATP-dependent DNA helicase	NA	NA	X	NA
14	CaPastO	NP_950607	NC_005303	354	401509	404625	3117	1	uvrD	ATP-dependent DNA helicase	NA	NA	X	NA
14	CaPastO	NP_950665	NC_005303	412	458850	461282	2433	-1	uvrD	ATP-dependent DNA helicase	NA	NA	X	NA
14	CaPastO	NP_950757	NC_005303	501	571147	573768	2622	-1	uvrD	ATP-dependent DNA helicase	NA	NA	X	NA
14	CaPastO	NP_950779	NC_005303	523	593013	596129	3117	-1	uvrD	ATP-dependent DNA helicase	NA	NA	X	NA
14	CaPastO	NP_950811	NC_005303	555	624971	627511	2541	1	uvrD	ATP-dependent DNA helicase	NA	NA	X	NA
14	CaPastO	NP_950980	NC_005303	723	820621	822714	2094	-1	NA	hypothetical protein	NA	NA	X	NA
15	CaPaus	YP_001798743	NC_010544	33	45699	45887	189	1	NA	hypothetical protein	NA	NA	X	NA
15	CaPaus	YP_001798870	NC_010544	160	236090	236278	189	1	NA	hypothetical protein	NA	NA	X	NA
15	CaPaus	YP_001798877	NC_010544	167	246205	246393	189	-1	NA	hypothetical protein	NA	NA	X	NA
15	CaPaus	YP_001798898	NC_010544	188	270367	270555	189	1	NA	hypothetical protein	NA	NA	X	NA
15	CaPaus	YP_001798907	NC_010544	197	282088	282276	189	-1	NA	hypothetical protein	NA	NA	X	NA
15	CaPaus	YP_001798945	NC_010544	235	342208	342396	189	-1	NA	hypothetical protein	NA	NA	X	NA
15	CaPaus	YP_001798960	NC_010544	250	351248	351436	189	1	NA	hypothetical protein	NA	NA	X	NA
15	CaPaus	YP_001799027	NC_010544	317	422623	422811	189	-1	NA	hypothetical protein	NA	NA	X	NA
15	CaPaus	YP_001799038	NC_010544	328	430628	430816	189	1	NA	hypothetical protein	NA	NA	X	NA
15	CaPaus	YP_001799308	NC_010544	598	752041	752229	189	1	NA	hypothetical protein	NA	NA	X	NA
15	CaPaus	YP_001799358	NC_010544	648	825725	825913	189	-1	NA	hypothetical protein	NA	NA	X	NA
16	CaPastA	YP_456424	NC_007716	228	238611	239486	876	-1	NA	hypothetical protein	NA	NA	X	NA
16	CaPastO	NP_950298	NC_005303	46	58212	59057	846	1	NA	hypothetical protein	NA	NA	X	NA
16	CaPastO	NP_950318	NC_005303	66	86592	87452	861	1	NA	hypothetical protein	NA	NA	X	NA
16	CaPastO	NP_950579	NC_005303	326	373206	374069	864	1	NA	hypothetical protein	NA	NA	X	NA
16	CaPastO	NP_950601	NC_005303	348	396223	397095	873	-1	NA	hypothetical protein	NA	NA	X	NA
16	CaPastO	NP_950619	NC_005303	366	414099	414962	864	1	NA	hypothetical protein	NA	NA	X	NA
16	CaPastO	NP_950631	NC_005303	378	425341	426198	858	1	NA	hypothetical protein	NA	NA	X	NA
16	CaPastO	NP_950767	NC_005303	511	582041	582913	873	1	NA	hypothetical protein	NA	NA	X	NA
16	CaPastO	NP_950904	NC_005303	647	737802	738662	861	-1	NA	hypothetical protein	NA	NA	X	NA
16	PNWB_v1	c0530	Contig1B	16	21031	21870	840	1	NA	hypothetical protein	NA	NA	X	NA
17	CaPaus	YP_001798736	NC_010544	26	41240	42523	1284	1	dnaB	Replicative DNA helicase	K02314	COG0305	L	Replicative DNA helicase
17	CaPaus	YP_001798761	NC_010544	51	80418	81701	1284	-1	dnaB	Replicative DNA helicase	K02314	COG0305	L	Replicative DNA helicase
17	CaPaus	YP_001798863	NC_010544	153	231670	232953	1284	1	NA	Replicative DNA helicase, prophage	K02314	COG0305	L	Replicative DNA helicase
17	CaPaus	YP_001798878	NC_010544	168	246793	248076	1284	-1	NA	Replicative DNA helicase, prophage	K02314	COG0305	L	Replicative DNA helicase
17	CaPaus	YP_001798891	NC_010544	181	265947	267230	1284	1	NA	Replicative DNA helicase, prophage	K02314	COG0305	L	Replicative DNA helicase
17	CaPaus	YP_001798914	NC_010544	204	287469	288752	1284	-1	NA	Replicative DNA helicase, prophage	K02314	COG0305	L	Replicative DNA helicase
17	CaPaus	YP_001798952	NC_010544	242	345533	346816	1284	-1	NA	Replicative DNA helicase, prophage	K02314	COG0305	L	Replicative DNA helicase
17	CaPaus	YP_001798988	NC_010544	278	382811	384094	1284	1	NA	Replicative DNA helicase, prophage	K02314	COG0305	L	Replicative DNA helicase
17	CaPaus	YP_001799303	NC_010544	593	747680	748963	1284	1	NA	Replicative DNA helicase, prophage	K02314	COG0305	L	Replicative DNA helicase
17	CaPaus	YP_001799365	NC_010544	655	829050	830333	1284	-1	NA	Replicative DNA helicase, prophage	K02314	COG0305	L	Replicative DNA helicase
18	CaPaus	YP_001798738	NC_010544	28	43168	43815	648	1	tmk	Thymidylate kinase	K00943	COG0125	F	Thymidylate kinase
18	CaPaus	YP_001798760	NC_010544	50	79126	79773	648	-1	tmk	Thymidylate kinase	K00943	COG0125	F	Thymidylate kinase
18	CaPaus	YP_001798865	NC_010544	155	233598	234245	648	1	tmk	Thymidylate kinase	K00943	COG0125	F	Thymidylate kinase
18	CaPaus	YP_001798893	NC_010544	183	267875	268522	648	1	tmk	Thymidylate kinase	K00943	COG0125	F	Thymidylate kinase
18	CaPaus	YP_001798950	NC_010544	240	344241	344888	648	-1	tmk	Thymidylate kinase	K00943	COG0125	F	Thymidylate kinase
18	CaPaus	YP_001798990	NC_010544	280	384739	385386	648	1	tmk	Thymidylate kinase	K00943	COG0125	F	Thymidylate kinase
18	CaPaus	YP_001799032	NC_010544	322	424657	425304	648	-1	tmk	Thymidylate kinase	K00943	COG0125	F	Thymidylate kinase
18	CaPaus	YP_001799035	NC_010544	325	428912	429499	588	1	tmk	Thymidylate kinase	NA	NA	X	NA
18	CaPaus	YP_001799304	NC_010544	594	749608	750255	648	1	tmk	Thymidylate kinase	K00943	COG0125	F	Thymidylate kinase
18	CaPaus	YP_001799363	NC_010544	653	827758	828405	648	-1	tmk	Thymidylate kinase	K00943	COG0125	F	Thymidylate kinase
19	CaPastA	YP_456411	NC_007716	215	227748	228689	942	-1	tra5	Tra5 transposase	NA	NA	X	NA
19	CaPastO	NP_950589	NC_005303	336	383271	384200	930	-1	tra5	putative transposase	NA	NA	X	NA
19	CaPastO	NP_950799	NC_005303	543	612792	613721	930	-1	tra5	putative transposase	NA	NA	X	NA
19	CaPastO	NP_950819	NC_005303	563	634664	635593	930	-1	tra5	putative transposase	NA	NA	X	NA
19	CaPaus	YP_001798974	NC_010544	264	366099	367061	963	-1	NA	Putative phage integrase	NA	NA	X	NA
19	CaPaus	YP_001799205	NC_010544	495	616196	617140	945	-1	NA	Putative phage integrase	K07497	COG2801	L	Transposase and inactivated derivatives
19	CaPaus	YP_001799345	NC_010544	635	809676	810620	945	-1	NA	Putative phage integrase	NA	NA	X	NA
19	CaPaus	YP_001799366	NC_010544	656	830826	831770	945	1	NA	Putative phage integrase	NA	NA	X	NA
19	CaPmal	YP_002004453	NC_011047	411	504761	505735	975	1	NA	transposase	NA	NA	X	NA
20	CaPastA	YP_456475	NC_007716	279	294852	295658	807	1	NA	hypothetical protein	NA	NA	X	NA
20	CaPastO	NP_950943	NC_005303	686	783211	784008	798	-1	NA	hypothetical protein	NA	NA	X	NA
20	CaPaus	YP_001798756	NC_010544	46	70867	71949	1083	-1	NA	hypothetical protein	NA	NA	X	NA
20	CaPaus	YP_001798861	NC_010544	151	223698	224780	1083	-1	NA	hypothetical protein	NA	NA	X	NA
20	CaPaus	YP_001798875	NC_010544	165	242931	244013	1083	1	NA	hypothetical protein	NA	NA	X	NA
20	CaPaus	YP_001798902	NC_010544	192	277207	278289	1083	1	NA	hypothetical protein	NA	NA	X	NA
20	CaPaus	YP_001798999	NC_010544	289	394113	395204	1092	1	NA	hypothetical protein	NA	NA	X	NA
20	CaPaus	YP_001799312	NC_010544	602	759249	760328	1080	1	NA	hypothetical protein	NA	NA	X	NA
20	CaPaus	YP_001799353	NC_010544	643	818026	819117	1092	-1	NA	hypothetical protein	NA	NA	X	NA
21	CaPaus	YP_001798739	NC_010544	29	43835	44011	177	1	NA	hypothetical protein	NA	NA	X	NA
21	CaPaus	YP_001798866	NC_010544	156	234265	234441	177	1	NA	hypothetical protein	NA	NA	X	NA
21	CaPaus	YP_001798894	NC_010544	184	268542	268718	177	1	NA	hypothetical protein	NA	NA	X	NA
21	CaPaus	YP_001798910	NC_010544	200	283383	283934	552	-1	NA	hypothetical protein	NA	NA	X	NA
21	CaPaus	YP_001798949	NC_010544	239	344045	344221	177	-1	NA	hypothetical protein	NA	NA	X	NA
21	CaPaus	YP_001798991	NC_010544	281	385406	385582	177	1	NA	hypothetical protein	NA	NA	X	NA
21	CaPaus	YP_001799031	NC_010544	321	424461	424637	177	-1	NA	hypothetical protein	NA	NA	X	NA
21	CaPaus	YP_001799305	NC_010544	595	750275	750451	177	1	NA	hypothetical protein	NA	NA	X	NA
21	CaPaus	YP_001799362	NC_010544	652	827562	827738	177	-1	NA	hypothetical protein	NA	NA	X	NA
22	CaPastA	YP_456371	NC_007716	175	196274	197239	966	-1	tra5	Tra5 transposase	NA	NA	X	NA
22	CaPastA	YP_456483	NC_007716	287	302292	303257	966	1	tra5	Tra5 transposase	NA	NA	X	NA
22	CaPastA	YP_456485	NC_007716	289	305396	306361	966	1	tra5	Tra5 transposase	NA	NA	X	NA
22	CaPastO	NP_950826	NC_005303	570	643423	644361	939	1	tra5	putative transposase	NA	NA	X	NA
22	CaPastO	NP_950894	NC_005303	637	727774	728712	939	-1	tra5	putative transposase	NA	NA	X	NA
22	CaPastO	NP_950918	NC_005303	661	756675	757625	951	-1	tra5	putative transposase	NA	NA	X	NA
22	CaPaus	YP_001798804	NC_010544	94	142979	143923	945	-1	NA	Putative phage integrase	NA	NA	X	NA
22	PNWB_v1	c0650	Contig1B	26	31501	32439	939	1	tra5	putative transposase	NA	NA	X	NA
23	CaPastA	YP_456787	NC_007716	591	611341	613371	2031	-1	ftsH	cell division protein ftsH-like protein	K03798	COG0465	O	ATP-dependent Zn proteases
23	CaPastO	NP_950382	NC_005303	130	155627	157651	2025	1	hflB	ATP-dependent Zn protease	K03798	COG0465	O	ATP-dependent Zn proteases
23	CaPastO	NP_950965	NC_005303	708	805183	806277	1095	1	hflB	ATP-dependent Zn protease	NA	NA	X	NA
23	CaPaus	YP_001799074	NC_010544	364	485475	487418	1944	1	hflB	ATP-dependent Zn protease	K03798	COG0465	O	ATP-dependent Zn proteases
23	CaPmal	YP_002004076	NC_011047	34	42209	44011	1803	-1	hflB	ATP-dependent Zn protease	K03798	COG0465	O	ATP-dependent Zn proteases
23	CaPmal	YP_002004306	NC_011047	264	347997	350057	2061	1	hflB	ATP-dependent Zn protease	K03798	COG0465	O	ATP-dependent Zn proteases
23	CaPmal	YP_002004490	NC_011047	446	557936	559735	1800	1	hflB	ATP-dependent Zn protease	K03798	COG0465	O	ATP-dependent Zn proteases
23	PNWB_v1	c1990	Contig1H	13	16084	18141	2058	-1	ftsH	cell division protein FtsH, ATP-dependent Zn protease	K03798	COG0465	O	ATP-dependent Zn proteases
24	CaPastA	YP_456537	NC_007716	341	365836	366357	522	-1	NA	hypothetical protein	NA	NA	X	NA
24	CaPastA	YP_456543	NC_007716	347	368855	369310	456	-1	NA	hypothetical protein	NA	NA	X	NA
24	CaPastO	NP_950300	NC_005303	48	60238	60963	726	1	NA	hypothetical protein	NA	NA	X	NA
24	CaPastO	NP_950320	NC_005303	68	88612	89337	726	1	NA	hypothetical protein	NA	NA	X	NA
24	CaPastO	NP_950599	NC_005303	346	394311	395036	726	-1	NA	hypothetical protein	NA	NA	X	NA
24	CaPastO	NP_950791	NC_005303	535	604706	605437	732	1	NA	hypothetical protein	NA	NA	X	NA
24	CaPastO	NP_950827	NC_005303	571	645119	645853	735	1	NA	hypothetical protein	NA	NA	X	NA
24	CaPastO	NP_950902	NC_005303	645	735947	736642	696	-1	NA	hypothetical protein	NA	NA	X	NA
25	CaPastA	YP_456651	NC_007716	455	469812	470600	789	-1	NA	hypothetical protein	NA	NA	X	NA
25	CaPastO	NP_950518	NC_005303	265	306887	307555	669	1	NA	hypothetical protein	NA	NA	X	NA
25	CaPaus	YP_001798944	NC_010544	234	341149	341946	798	1	NA	hypothetical protein	NA	NA	X	NA
25	CaPaus	YP_001799019	NC_010544	309	409174	409971	798	-1	NA	hypothetical protein	NA	NA	X	NA
25	CaPaus	YP_001799349	NC_010544	639	813755	814552	798	1	NA	hypothetical protein	NA	NA	X	NA
25	CaPaus	YP_001799368	NC_010544	658	832632	833429	798	-1	NA	hypothetical protein	NA	NA	X	NA
25	CaPmal	YP_002004051	NC_011047	9	10623	11426	804	-1	NA	hypothetical protein	NA	NA	X	NA
25	CaPmal	YP_002004515	NC_011047	471	590518	591321	804	1	NA	hypothetical protein	NA	NA	X	NA
26	CaPastA	YP_456331	NC_007716	135	161028	162779	1752	1	phnL	ABC transporter ATP-binding protein	K02003	COG1136;COG4181	QV	ABC-type antimicrobial peptide transport system, ATPase component;Predicted ABC-type transport system involved in lysophospholipase L1 biosynthesis, ATPase component
26	CaPastO	NP_950851	NC_005303	595	676146	677774	1629	1	phnL	ABC transporter, ATPase component	K02003	COG1136;COG4181	QV	ABC-type antimicrobial peptide transport system, ATPase component;Predicted ABC-type transport system involved in lysophospholipase L1 biosynthesis, ATPase component
26	CaPaus	YP_001799115	NC_010544	405	525466	526980	1515	-1	phnL	ABC transporter, ATPase component	K02003	COG1136;COG4181	QV	ABC-type antimicrobial peptide transport system, ATPase component;Predicted ABC-type transport system involved in lysophospholipase L1 biosynthesis, ATPase component
26	CaPmal	YP_002004055	NC_011047	13	15671	17320	1650	-1	phnL	ABC transporter ATPase	K02003	COG1136;COG4181	QV	ABC-type antimicrobial peptide transport system, ATPase component;Predicted ABC-type transport system involved in lysophospholipase L1 biosynthesis, ATPase component
26	CaPmal	YP_002004141	NC_011047	99	134217	135851	1635	-1	phnL	ABC transporter ATPase	K02003	COG1136;COG4181	QV	ABC-type antimicrobial peptide transport system, ATPase component;Predicted ABC-type transport system involved in lysophospholipase L1 biosynthesis, ATPase component
26	CaPmal	YP_002004511	NC_011047	467	584624	586273	1650	1	phnL	ABC transporter ATPase	K02003	COG1136;COG4181	QV	ABC-type antimicrobial peptide transport system, ATPase component;Predicted ABC-type transport system involved in lysophospholipase L1 biosynthesis, ATPase component
26	PNWB_v1	c1910	Contig1H	5	5162	7339	2178	-1	phnL2	ABC-type transport system, ATPase component	K02003	COG1136;COG4181	QV	ABC-type antimicrobial peptide transport system, ATPase component;Predicted ABC-type transport system involved in lysophospholipase L1 biosynthesis, ATPase component
27	CaPastA	YP_456270	NC_007716	74	87154	87786	633	1	tmk	thymidylate kinase	NA	NA	X	NA
27	CaPastA	YP_456377	NC_007716	181	203228	203860	633	-1	tmk	thymidylate kinase	NA	NA	X	NA
27	CaPastA	YP_456418	NC_007716	222	234275	234907	633	-1	tmk	thymidylate kinase	K00943	COG0125	F	Thymidylate kinase
27	CaPastO	NP_950596	NC_005303	343	391588	392202	615	-1	tmk	thymidylate kinase	K00943	COG0125	F	Thymidylate kinase
27	CaPaus	YP_001798935	NC_010544	225	331335	331964	630	-1	tmk	Thymidylate kinase	K00943	COG0125	F	Thymidylate kinase
27	CaPaus	YP_001798985	NC_010544	275	376715	377344	630	-1	tmk	Thymidylate kinase	K00943	COG0125	F	Thymidylate kinase
27	CaPmal	YP_002004434	NC_011047	392	481215	481832	618	1	tmk	thymidylate kinase	K00943	COG0125	F	Thymidylate kinase
28	CaPastA	YP_456408	NC_007716	212	224688	225296	609	1	NA	hypothetical protein	NA	NA	X	NA
28	CaPastA	YP_456572	NC_007716	376	390191	390799	609	-1	NA	hypothetical protein	NA	NA	X	NA
28	CaPastO	NP_950814	NC_005303	558	629731	630261	531	-1	NA	hypothetical protein	NA	NA	X	NA
28	CaPaus	YP_001798964	NC_010544	254	352562	353092	531	1	NA	hypothetical protein	NA	NA	X	NA
28	CaPaus	YP_001799002	NC_010544	292	400196	400726	531	-1	NA	hypothetical protein	NA	NA	X	NA
28	CaPaus	YP_001799022	NC_010544	312	412345	412875	531	1	NA	hypothetical protein	NA	NA	X	NA
28	CaPmal	YP_002004435	NC_011047	393	482190	482807	618	1	NA	hypothetical protein	NA	NA	X	NA
29	CaPastA	YP_456380	NC_007716	184	205786	208041	2256	-1	NA	hypothetical protein	NA	NA	X	NA
29	CaPastA	YP_456474	NC_007716	278	293659	294771	1113	1	NA	hypothetical protein	NA	NA	X	NA
29	CaPastO	NP_950944	NC_005303	687	784089	785780	1692	-1	NA	hypothetical protein	NA	NA	X	NA
29	CaPaus	YP_001798874	NC_010544	164	239355	242849	3495	1	NA	hypothetical protein	NA	NA	X	NA
29	CaPaus	YP_001798998	NC_010544	288	390537	394031	3495	1	NA	hypothetical protein	NA	NA	X	NA
29	CaPaus	YP_001799023	NC_010544	313	416053	419547	3495	-1	NA	hypothetical protein	NA	NA	X	NA
29	CaPaus	YP_001799354	NC_010544	644	819199	822693	3495	-1	NA	hypothetical protein	NA	NA	X	NA
30	CaPmal	YP_002004049	NC_011047	7	8055	8774	720	-1	NA	hypothetical protein	NA	NA	X	NA
30	CaPmal	YP_002004074	NC_011047	32	39204	39908	705	-1	NA	hypothetical protein	NA	NA	X	NA
30	CaPmal	YP_002004128	NC_011047	86	118592	119248	657	-1	NA	hypothetical protein	NA	NA	X	NA
30	CaPmal	YP_002004457	NC_011047	415	511549	512205	657	1	NA	hypothetical protein	NA	NA	X	NA
30	CaPmal	YP_002004461	NC_011047	419	517106	517810	705	1	NA	hypothetical protein	NA	NA	X	NA
30	CaPmal	YP_002004492	NC_011047	448	562036	562740	705	1	NA	hypothetical protein	NA	NA	X	NA
30	CaPmal	YP_002004517	NC_011047	473	593170	593889	720	1	NA	hypothetical protein	NA	NA	X	NA
31	CaPastA	YP_456567	NC_007716	371	386744	387349	606	-1	NA	hypothetical protein	NA	NA	X	NA
31	CaPaus	YP_001798941	NC_010544	231	338730	339461	732	-1	NA	hypothetical protein	NA	NA	X	NA
31	CaPaus	YP_001799229	NC_010544	519	647729	648562	834	1	NA	hypothetical protein	NA	NA	X	NA
31	PNWB_v1	c0180	Contig1A	10	17616	18389	774	1	NA	putative effector	NA	NA	X	NA
31	PNWB_v1	c0460	Contig1B	10	14608	15147	540	-1	NA	putative effector	NA	NA	X	NA
31	PNWB_v1	c3890	Contig2B	6	7762	8535	774	-1	NA	putative effector	NA	NA	X	NA
32	CaPastA	YP_456399	NC_007716	203	219745	220554	810	-1	NA	hypothetical protein	NA	NA	X	NA
32	CaPastO	NP_950582	NC_005303	329	376003	376815	813	1	NA	hypothetical protein	NA	NA	X	NA
32	CaPastO	NP_950622	NC_005303	369	416896	417708	813	1	NA	hypothetical protein	NA	NA	X	NA
32	CaPastO	NP_950828	NC_005303	572	645919	646728	810	1	NA	hypothetical protein	NA	NA	X	NA
32	CaPaus	YP_001798938	NC_010544	228	336509	337288	780	-1	NA	hypothetical protein	NA	NA	X	NA
32	PNWB_v1	c0390	Contig1B	5	5395	6159	765	1	NA	putative effector, AYWB SAP55-like protein	NA	NA	X	NA
33	CaPastA	YP_456507	NC_007716	311	325577	326020	444	1	iscU	IscU protein	K04488	COG0822	C	NifU homolog involved in Fe-S cluster formation
33	CaPastO	NP_950719	NC_005303	463	524013	524456	444	-1	iscU	protein NifU	K04488	COG0822	C	NifU homolog involved in Fe-S cluster formation
33	CaPaus	YP_001799129	NC_010544	419	552177	552620	444	-1	iscU	NifU homolog	K04488	COG0822	C	NifU homolog involved in Fe-S cluster formation
33	CaPmal	YP_002004152	NC_011047	110	150045	150485	441	-1	iscU	NifU-like protein	K04488	COG0822	C	NifU homolog involved in Fe-S cluster formation
33	PNWB_v1	c0980	Contig1C	27	40731	41165	435	-1	iscU1	iron-sulfur cluster assembly scaffold protein	K04488	COG0822	C	NifU homolog involved in Fe-S cluster formation
33	PNWB_v1	c2500	Contig1H	60	85559	86014	456	-1	iscU2	iron-sulfur cluster assembly scaffold protein	K04488	COG0822	C	NifU homolog involved in Fe-S cluster formation
34	CaPastA	YP_456409	NC_007716	213	225535	226548	1014	1	hflB	ATP-dependent Zn protease	NA	NA	X	NA
34	CaPastO	NP_950813	NC_005303	557	628484	629596	1113	-1	hflB	ATP-dependent Zn protease	NA	NA	X	NA
34	CaPmal	YP_002004053	NC_011047	11	12875	13987	1113	-1	hflB	ATP-dependent Zn protease	NA	NA	X	NA
34	CaPmal	YP_002004437	NC_011047	395	483389	484633	1245	1	hflB	ATP-dependent Zn protease	NA	NA	X	NA
34	CaPmal	YP_002004513	NC_011047	469	587957	589069	1113	1	hflB	ATP-dependent Zn protease	NA	NA	X	NA
34	PNWB_v1	c1510	Contig1G	29	40592	41758	1167	-1	hflB2	ATP-dependent Zn protease	NA	NA	X	NA
35	CaPastA	YP_456460	NC_007716	264	279732	280478	747	-1	artP	ABC-type polar amino acid transport system, ATPase component	K02028	COG1126	E	ABC-type polar amino acid transport system, ATPase component
35	CaPastA	YP_456830	NC_007716	634	660096	660824	729	-1	glnQ	ABC-type glutamine transport system, ATP-binding protein glnQ	K02028	COG1126	E	ABC-type polar amino acid transport system, ATPase component
35	CaPastO	NP_950331	NC_005303	79	103752	104231	480	1	glnQ	ABC-type polar amino acid transport system, ATPase component	NA	NA	X	NA
35	CaPastO	NP_950740	NC_005303	485	547662	548408	747	1	glnQ	ABC-type polar amino acid transport system, ATPase component	K02028	COG1126	E	ABC-type polar amino acid transport system, ATPase component
35	CaPaus	YP_001799334	NC_010544	624	795500	796231	732	-1	glnQ	ABC-type amino acid transport system,ATPase component	K02028	COG1126	E	ABC-type polar amino acid transport system, ATPase component
35	PNWB_v1	c2410	Contig1H	51	74431	75168	738	1	artP	ABC-type polar amino acid transport system, ATPase component	K02028	COG1126	E	ABC-type polar amino acid transport system, ATPase component
36	CaPastA	YP_456522	NC_007716	326	347369	347977	609	1	sodA	superoxide dismutase	K04564	COG0605	P	Superoxide dismutase
36	CaPastO	NP_950694	NC_005303	437	483706	484314	609	1	sodA	superoxide dismutase	K04564	COG0605	P	Superoxide dismutase
36	CaPaus	YP_001799390	NC_010544	680	874968	875579	612	-1	sodA	Superoxide dismutase	K04564	COG0605	P	Superoxide dismutase
36	CaPmal	YP_002004072	NC_011047	30	37315	37929	615	-1	sodA	superoxide dismutase	K04564	COG0605	P	Superoxide dismutase
36	CaPmal	YP_002004494	NC_011047	450	564015	564629	615	1	sodA	superoxide dismutase	K04564	COG0605	P	Superoxide dismutase
36	PNWB_v1	c2450	Contig1H	55	80719	81345	627	1	sodA	superoxide dismutase	K04564	COG0605	P	Superoxide dismutase
37	CaPastA	YP_456514	NC_007716	318	338683	340056	1374	-1	srmB	superfamily II DNA/RNA helicase	NA	NA	X	NA
37	CaPastO	NP_950705	NC_005303	449	501698	502771	1074	1	srmB	superfamily II DNA and RNA helicase	NA	NA	X	NA
37	CaPaus	YP_001799048	NC_010544	338	444659	445957	1299	-1	NA	ATP-dependent RNA helicase, DEAD-DEAH box family	NA	NA	X	NA
37	CaPmal	YP_002004070	NC_011047	28	35528	36724	1197	-1	srmB	superfamily II DNA and RNA helicase	NA	NA	X	NA
37	CaPmal	YP_002004496	NC_011047	452	565220	566416	1197	1	srmB	superfamily II DNA and RNA helicase	NA	NA	X	NA
37	PNWB_v1	c2470	Contig1H	57	82076	83185	1110	1	srmB2	superfamily II DNA/RNA helicase	NA	NA	X	NA
38	CaPastA	YP_456513	NC_007716	317	337721	338599	879	-1	nfo	endonuclease IV	K01151	COG0648	L	Endonuclease IV
38	CaPastO	NP_950706	NC_005303	450	503294	504172	879	1	nfo	endonuclease IV	K01151	COG0648	L	Endonuclease IV
38	CaPaus	YP_001799047	NC_010544	337	444382	444633	252	-1	NA	Putative endonuclease IV, fragment	K01151	COG0648	L	Endonuclease IV
38	CaPmal	YP_002004069	NC_011047	27	34675	35535	861	-1	nfo	endonuclease IV	K01151	COG0648	L	Endonuclease IV
38	CaPmal	YP_002004497	NC_011047	453	566409	567269	861	1	nfo	endonuclease IV	K01151	COG0648	L	Endonuclease IV
38	PNWB_v1	c2480	Contig1H	58	83256	84131	876	1	nfo	endonuclease IV	K01151	COG0648	L	Endonuclease IV
39	CaPastA	YP_456509	NC_007716	313	327191	331909	4719	-1	polC	DNA polymerase III alpha subunit	K03763	COG2176	L	DNA polymerase III, alpha subunit (gram-positive type)
39	CaPastO	NP_950717	NC_005303	461	518128	522843	4716	1	polC	DNA polymerase III alpha subunit	K03763	COG2176	L	DNA polymerase III, alpha subunit (gram-positive type)
39	CaPaus	YP_001799126	NC_010544	416	543097	547689	4593	1	polC	DNA polymerase III alpha subunit	K03763	COG2176	L	DNA polymerase III, alpha subunit (gram-positive type)
39	CaPmal	YP_002004121	NC_011047	79	98388	102956	4569	-1	polC1	DNA polymerase III subunit alpha	K03763	COG2176	L	DNA polymerase III, alpha subunit (gram-positive type)
39	CaPmal	YP_002004452	NC_011047	410	500395	504744	4350	1	polC2	DNA polymerase III subunit alpha	K03763	COG2176	L	DNA polymerase III, alpha subunit (gram-positive type)
39	PNWB_v1	c3120	Contig1I	45	60518	65086	4569	-1	polC	DNA polymerase III subunit alpha (PolC)	K03763	COG2176	L	DNA polymerase III, alpha subunit (gram-positive type)
40	CaPastA	YP_456817	NC_007716	621	645598	646692	1095	-1	mntB	ABC-type Mn/Zn transport system, membrane protein	K11709	COG1108	P	ABC-type Mn2+/Zn2+ transport systems, permease components
40	CaPastO	NP_950346	NC_005303	94	117672	119831	2160	1	znuB	ABC-type Mn/Zn transport system, permease	K11709	COG1108	P	ABC-type Mn2+/Zn2+ transport systems, permease components
40	CaPaus	YP_001799070	NC_010544	360	479443	480531	1089	1	znuB	ABC-type Zn/Mn transport system,permease component	K11709	COG1108	P	ABC-type Mn2+/Zn2+ transport systems, permease components
40	CaPmal	YP_002004045	NC_011047	3	2412	3506	1095	-1	znuB	ABC-type Mn/Zn transport system, permease component, fragment	K11709	COG1108	P	ABC-type Mn2+/Zn2+ transport systems, permease components
40	CaPmal	YP_002004521	NC_011047	477	598438	599532	1095	1	znuB	ABC-type Mn/Zn transport system, permease component, fragment	K11709	COG1108	P	ABC-type Mn2+/Zn2+ transport systems, permease components
40	PNWB_v1	c3510	Contig2A	26	32342	33433	1092	-1	znuB2	ABC-type Mn/Zn transport system, permease component	K11709	COG1108	P	ABC-type Mn2+/Zn2+ transport systems, permease components
41	CaPastA	YP_456819	NC_007716	623	647786	648550	765	-1	mntA	ABC-type Mn/Zn transport system, ATP-binding protein	K11710	COG1121	P	ABC-type Mn/Zn transport systems, ATPase component
41	CaPastO	NP_950345	NC_005303	93	116807	117571	765	1	znuC	ABC-type Mn/Zn transport system, ATPase	K11710	COG1121	P	ABC-type Mn/Zn transport systems, ATPase component
41	CaPaus	YP_001799068	NC_010544	358	477742	478506	765	1	znuC	ABC-type Zn/Mn transport system, ATPase component	K11710	COG1121	P	ABC-type Mn/Zn transport systems, ATPase component
41	CaPmal	YP_002004047	NC_011047	5	4588	5334	747	-1	znuC	ABC-type Mn/Zn transport system, ATPase component	K11710	COG1121	P	ABC-type Mn/Zn transport systems, ATPase component
41	CaPmal	YP_002004519	NC_011047	475	596610	597356	747	1	znuC	ABC-type Mn/Zn transport system, ATPase component	K11710	COG1121	P	ABC-type Mn/Zn transport systems, ATPase component
41	PNWB_v1	c3530	Contig2A	28	34486	35238	753	-1	znuC	ABC-type Mn/Zn transport system, ATPase component	K11710	COG1121	P	ABC-type Mn/Zn transport systems, ATPase component
42	CaPastA	YP_456820	NC_007716	624	648572	649714	1143	-1	znuA	ABC-type Mn/Zn transport system, periplasmic Mn/Zn-binding protein	K11707	COG0803	P	ABC-type metal ion transport system, periplasmic component/surface adhesin
42	CaPastO	NP_950344	NC_005303	92	115631	116776	1146	1	znuA	ABC-type Mn/Zn transport system, periplasmic Mn/Zn-binding protein	K11707	COG0803	P	ABC-type metal ion transport system, periplasmic component/surface adhesin
42	CaPaus	YP_001799067	NC_010544	357	476283	477404	1122	1	znuA	ABC-type Zn/Mn transport system periplasmic component/surface adhesion	K11707	COG0803	P	ABC-type metal ion transport system, periplasmic component/surface adhesin
42	CaPmal	YP_002004048	NC_011047	6	5389	6462	1074	-1	znuA	ABC-type Mn/Zn transport system, periplasmic Mn/Zn-binding protein	K11707	COG0803	P	ABC-type metal ion transport system, periplasmic component/surface adhesin
42	CaPmal	YP_002004518	NC_011047	474	595482	596555	1074	1	znuA	ABC-type Mn/Zn transport system, periplasmic Mn/Zn-binding protein	K11707	COG0803	P	ABC-type metal ion transport system, periplasmic component/surface adhesin
42	PNWB_v1	c3540	Contig2A	29	35240	36289	1050	-1	znuA	ABC-type Mn/Zn transport system, periplasmic Mn/Zn-binding protein	K11707	COG0803	P	ABC-type metal ion transport system, periplasmic component/surface adhesin
43	CaPastA	YP_456794	NC_007716	598	621635	623542	1908	-1	qns	glutamine-dependent NAD(+) synthetase	K01950	COG0171;COG0388	HR	NAD synthase;Predicted amidohydrolase
43	CaPastO	NP_950375	NC_005303	123	145355	146122	768	1	NA	hypothetical protein	K01950	COG0171;COG0388	HR	NAD synthase;Predicted amidohydrolase
43	CaPastO	NP_950376	NC_005303	124	146315	147289	975	1	nadE	NAD synthase	K01950	COG0171;COG0388	HR	NAD synthase;Predicted amidohydrolase
43	CaPaus	YP_001799324	NC_010544	614	777905	779671	1767	1	nadE	NAD(+) synthetase	K01950	COG0171;COG0388	HR	NAD synthase;Predicted amidohydrolase
43	CaPmal	YP_002004220	NC_011047	178	234446	236242	1797	-1	qns	glutamine-dependent NAD(+) synthetase	K01950	COG0171;COG0388	HR	NAD synthase;Predicted amidohydrolase
43	PNWB_v1	c3950	Contig2B	10	16726	18549	1824	-1	nadE	NAD synthase	K01950	COG0171;COG0388	HR	NAD synthase;Predicted amidohydrolase
44	CaPastA	YP_456697	NC_007716	501	521673	522326	654	-1	adk	adenylate kinase	K00939	COG0563	F	Adenylate kinase and related kinases
44	CaPastO	NP_950473	NC_005303	221	253498	254151	654	1	adk	adenylate kinase	K00939	COG0563	F	Adenylate kinase and related kinases
44	CaPaus	YP_001799151	NC_010544	441	573266	573919	654	-1	adk	Adenylate kinase	K00939	COG0563	F	Adenylate kinase and related kinases
44	CaPmal	YP_002004073	NC_011047	31	38278	38952	675	1	adk	Adenylate kinase (ATP-AMP transphosphorylase)	K00939	COG0563	F	Adenylate kinase and related kinases
44	CaPmal	YP_002004493	NC_011047	449	562992	563666	675	-1	adk	Adenylate kinase (ATP-AMP transphosphorylase)	K00939	COG0563	F	Adenylate kinase and related kinases
44	PNWB_v1	c4300	Contig3A	27	41730	42386	657	-1	adk	adenylate kinase	K00939	COG0563	F	Adenylate kinase and related kinases
45	CaPastA	YP_456269	NC_007716	73	85667	86227	561	1	NA	hypothetical protein	NA	NA	X	NA
45	CaPastO	NP_950322	NC_005303	70	90298	90870	573	1	NA	hypothetical protein	NA	NA	X	NA
45	CaPastO	NP_950583	NC_005303	330	376958	377524	567	1	NA	hypothetical protein	NA	NA	X	NA
45	CaPastO	NP_950623	NC_005303	370	417851	418417	567	1	NA	hypothetical protein	NA	NA	X	NA
45	CaPastO	NP_950794	NC_005303	538	606915	607481	567	1	NA	hypothetical protein	NA	NA	X	NA
45	CaPaus	YP_001799230	NC_010544	520	648587	649144	558	1	NA	hypothetical protein	NA	NA	X	NA
46	CaPastO	NP_950324	NC_005303	72	92123	92512	390	1	NA	hypothetical protein	NA	NA	X	NA
46	CaPastO	NP_950626	NC_005303	373	420049	420486	438	1	tmk	thymidylate kinase	NA	NA	X	NA
46	CaPastO	NP_950642	NC_005303	389	435989	436369	381	-1	NA	hypothetical protein	NA	NA	X	NA
46	CaPastO	NP_950773	NC_005303	517	586909	587523	615	1	tmk	thymidylate kinase	NA	NA	X	NA
46	CaPastO	NP_950796	NC_005303	540	608739	609119	381	1	NA	hypothetical protein	NA	NA	X	NA
46	CaPastO	NP_950899	NC_005303	642	733717	734097	381	-1	NA	hypothetical protein	NA	NA	X	NA
47	CaPastA	YP_456397	NC_007716	201	218456	218785	330	-1	NA	hypothetical protein	NA	NA	X	NA
47	CaPastA	YP_456435	NC_007716	239	247169	247876	708	1	NA	hypothetical protein	NA	NA	X	NA
47	CaPastO	NP_950806	NC_005303	550	620646	621224	579	-1	NA	hypothetical protein	NA	NA	X	NA
47	CaPaus	YP_001799044	NC_010544	334	437098	438582	1485	1	NA	hypothetical protein	NA	NA	X	NA
47	CaPaus	YP_001799299	NC_010544	589	743892	745298	1407	1	NA	hypothetical protein	NA	NA	X	NA
47	CaPmal	YP_002004296	NC_011047	254	336200	337378	1179	1	NA	hypothetical protein	NA	NA	X	NA
48	CaPaus	YP_001799112	NC_010544	402	523666	524106	441	-1	NA	hypothetical protein	NA	NA	X	NA
48	CaPmal	YP_002004050	NC_011047	8	8879	9595	717	-1	NA	hypothetical protein	NA	NA	X	NA
48	CaPmal	YP_002004129	NC_011047	87	119353	120072	720	-1	NA	hypothetical protein	NA	NA	X	NA
48	CaPmal	YP_002004456	NC_011047	414	510717	511466	750	1	NA	hypothetical protein	NA	NA	X	NA
48	CaPmal	YP_002004460	NC_011047	418	516332	516976	645	1	NA	hypothetical protein	NA	NA	X	NA
48	CaPmal	YP_002004516	NC_011047	472	592349	593065	717	1	NA	hypothetical protein	NA	NA	X	NA
49	CaPastA	YP_456261	NC_007716	65	75981	77351	1371	1	ffh	signal recognition particle, subunit FFH/SRP54	K03106	COG0541	U	Signal recognition particle GTPase
49	CaPastO	NP_950930	NC_005303	673	770094	771374	1281	-1	ffh	signal recognition particle GTPase	K03106	COG0541	U	Signal recognition particle GTPase
49	CaPaus	YP_001799380	NC_010544	670	852988	854349	1362	-1	ffh	Signal recognition particle GTPase	K03106	COG0541	U	Signal recognition particle GTPase
49	CaPmal	YP_002004113	NC_011047	71	87546	88916	1371	-1	ffh	signal recognition particle, subunit FFH/SRP54	K03106	COG0541	U	Signal recognition particle GTPase
49	PNWB_v1	c0080	Contig1A	1	5202	6572	1371	-1	ffh	signal recognition particle, subunit FFH/SRP54	K03106	COG0541	U	Signal recognition particle GTPase
50	CaPastA	YP_456260	NC_007716	64	74815	75885	1071	1	ftsY	signal recognition particle, docking protein FtsY	K03110	COG0552	U	Signal recognition particle GTPase
50	CaPastO	NP_950931	NC_005303	674	771636	772679	1044	-1	ftsY	signal recognition particle-docking protein	K03110	COG0552	U	Signal recognition particle GTPase
50	CaPaus	YP_001799381	NC_010544	671	854368	855363	996	-1	ftsY	Signal recognition particle-docking protein	K03110	COG0552	U	Signal recognition particle GTPase
50	CaPmal	YP_002004114	NC_011047	72	88964	89938	975	-1	ftsY	signal recognition particle-docking protein	K03110	COG0552	U	Signal recognition particle GTPase
50	PNWB_v1	c0090	Contig1A	2	6660	7616	957	-1	ftsY	signal recognition particle-docking protein	K03110	COG0552	U	Signal recognition particle GTPase
51	CaPastA	YP_456638	NC_007716	442	455542	457485	1944	-1	topA	DNA topoisomerase	K03168	COG0550;COG0551;COG1754	LR	Topoisomerase IA;Zn-finger domain associated with topoisomerase type I;Uncharacterized C-terminal domain of topoisomerase IA
51	CaPastO	NP_950531	NC_005303	278	320143	322086	1944	1	topA	topoisomerase IA	K03168	COG0550;COG0551;COG1754	LR	Topoisomerase IA;Zn-finger domain associated with topoisomerase type I;Uncharacterized C-terminal domain of topoisomerase IA
51	CaPaus	YP_001799217	NC_010544	507	632050	634017	1968	-1	topA	Topoisomerase IA	K03168	COG0550;COG0551;COG1754	LR	Topoisomerase IA;Zn-finger domain associated with topoisomerase type I;Uncharacterized C-terminal domain of topoisomerase IA
51	CaPmal	YP_002004115	NC_011047	73	89985	91784	1800	-1	topA	DNA topoisomerase I	K03168	COG0550;COG0551;COG1754	LR	Topoisomerase IA;Zn-finger domain associated with topoisomerase type I;Uncharacterized C-terminal domain of topoisomerase IA
51	PNWB_v1	c0100	Contig1A	3	7706	9685	1980	-1	topA	DNA topoisomerase I	K03168	COG0550;COG0551;COG1754	LR	Topoisomerase IA;Zn-finger domain associated with topoisomerase type I;Uncharacterized C-terminal domain of topoisomerase IA
52	CaPastA	YP_456639	NC_007716	443	457580	458467	888	-1	NA	GTP-binding protein	K14540	COG1161	R	Predicted GTPases
52	CaPastO	NP_950530	NC_005303	277	319165	320052	888	1	NA	hypothetical protein	K14540	COG1161	R	Predicted GTPases
52	CaPaus	YP_001799218	NC_010544	508	634038	634925	888	-1	NA	GTPase of unknown function	K14540	COG1161	R	Predicted GTPases
52	CaPmal	YP_002004116	NC_011047	74	91824	92693	870	-1	NA	hypothetical protein	K14540	COG1161	R	Predicted GTPases
52	PNWB_v1	c0110	Contig1A	4	9774	10625	852	-1	rbgA	ribosomal biogenesis GTPase	K14540	COG1161	R	Predicted GTPases
53	CaPastA	YP_456640	NC_007716	444	458497	459261	765	-1	NA	hypothetical protein	NA	NA	X	NA
53	CaPastO	NP_950529	NC_005303	276	318371	319135	765	1	NA	hypothetical protein	NA	NA	X	NA
53	CaPaus	YP_001799219	NC_010544	509	635328	636074	747	-1	NA	hypothetical protein	NA	NA	X	NA
53	CaPmal	YP_002004117	NC_011047	75	92741	93523	783	-1	NA	hypothetical protein	NA	NA	X	NA
53	PNWB_v1	c0120	Contig1A	5	10683	11423	741	-1	NA	hypothetical protein	NA	NA	X	NA
54	CaPastA	YP_456422	NC_007716	226	237514	238134	621	-1	NA	hypothetical protein	NA	NA	X	NA
54	CaPastO	NP_950299	NC_005303	47	58996	60171	1176	1	NA	hypothetical protein	NA	NA	X	NA
54	CaPastO	NP_950319	NC_005303	67	87922	88545	624	1	NA	hypothetical protein	NA	NA	X	NA
54	CaPastO	NP_950903	NC_005303	646	736709	737332	624	-1	NA	hypothetical protein	NA	NA	X	NA
54	PNWB_v1	c0540	Contig1B	17	22223	22966	744	1	smc	chromosome segregation ATPase-like protein	NA	NA	X	NA
55	CaPastA	YP_456575	NC_007716	379	391951	392835	885	-1	dam	adenine-specific methyltransferase	K06223	COG0338	L	Site-specific DNA methylase
55	CaPastO	NP_950661	NC_005303	408	454082	454966	885	1	dam	site-specific DNA methylase	K06223	COG0338	L	Site-specific DNA methylase
55	CaPastO	NP_950817	NC_005303	561	631552	632436	885	-1	dam	site-specific DNA methylase	K06223	COG0338	L	Site-specific DNA methylase
55	CaPaus	YP_001798911	NC_010544	201	283999	284811	813	-1	dam	Site-specific DNA methylase	K06223	COG0338	L	Site-specific DNA methylase
55	PNWB_v1	c0840	Contig1C	16	24173	24700	528	1	dam	adenine-specific DNA methyltransferase	K06223	COG0338	L	Site-specific DNA methylase
56	CaPastA	YP_456312	NC_007716	116	135433	137100	1668	-1	glnS	glutaminyl-tRNA synthetase	K01886	COG0008	J	Glutamyl- and glutaminyl-tRNA synthetases
56	CaPastO	NP_950872	NC_005303	616	701859	703673	1815	1	glnS	glutamyl- and glutaminyl-tRNA synthetase	K01886	COG0008	J	Glutamyl- and glutaminyl-tRNA synthetases
56	CaPaus	YP_001799269	NC_010544	559	705844	707475	1632	-1	glnS	glutaminyl-tRNA synthetase	K01886	COG0008	J	Glutamyl- and glutaminyl-tRNA synthetases
56	CaPmal	YP_002004238	NC_011047	196	261007	262629	1623	1	glnS	glutaminyl-tRNA synthetase	K01886	COG0008	J	Glutamyl- and glutaminyl-tRNA synthetases
56	PNWB_v1	c0910	Contig1C	20	31722	33353	1632	-1	glnS	glutaminyl-tRNA synthetase	K01886	COG0008	J	Glutamyl- and glutaminyl-tRNA synthetases
57	CaPastA	YP_456623	NC_007716	427	435845	436273	429	-1	NA	hypothetical protein	NA	NA	X	NA
57	CaPastO	NP_950548	NC_005303	295	342630	343058	429	1	NA	hypothetical protein	NA	NA	X	NA
57	CaPaus	YP_001798770	NC_010544	60	94880	95308	429	1	NA	hypothetical protein	NA	NA	X	NA
57	CaPmal	YP_002004274	NC_011047	232	311762	312184	423	-1	NA	hypothetical protein	NA	NA	X	NA
57	PNWB_v1	c1040	Contig1D	3	2832	3233	402	-1	NA	hypothetical protein	NA	NA	X	NA
58	CaPastA	YP_456621	NC_007716	425	435183	435398	216	1	NA	hypothetical protein	K09976	COG3763	S	Uncharacterized protein conserved in bacteria
58	CaPastO	NP_950550	NC_005303	297	343499	343714	216	-1	NA	hypothetical protein	K09976	COG3763	S	Uncharacterized protein conserved in bacteria
58	CaPaus	YP_001799088	NC_010544	378	497168	497374	207	-1	NA	hypothetical protein	K09976	COG3763	S	Uncharacterized protein conserved in bacteria
58	CaPmal	YP_002004276	NC_011047	234	312615	312812	198	-1	NA	hypothetical protein	K09976	COG3763	S	Uncharacterized protein conserved in bacteria
58	PNWB_v1	c1060	Contig1D	5	3649	3861	213	-1	NA	hypothetical protein	K09976	COG3763	S	Uncharacterized protein conserved in bacteria
59	CaPastA	YP_456620	NC_007716	424	434583	435143	561	1	asm	N6-adenine-specific methylase	NA	NA	X	NA
59	CaPastO	NP_950551	NC_005303	298	343768	344328	561	-1	NA	N6-adenine-specific methylase	NA	NA	X	NA
59	CaPaus	YP_001799089	NC_010544	379	497390	497959	570	-1	NA	N6-adenine-specific methylase	NA	NA	X	NA
59	CaPmal	YP_002004277	NC_011047	235	312848	313408	561	-1	NA	N6-adenine-specific methylase	NA	NA	X	NA
59	PNWB_v1	c1070	Contig1D	6	3903	4454	552	-1	asm	N6-adenine-specific methylase	NA	NA	X	NA
60	CaPastA	YP_456619	NC_007716	423	434353	434586	234	1	NA	hypothetical protein	NA	NA	X	NA
60	CaPastO	NP_950552	NC_005303	299	344325	344924	600	-1	NA	hypothetical protein	NA	NA	X	NA
60	CaPaus	YP_001799090	NC_010544	380	497956	498534	579	-1	NA	hypothetical protein	NA	NA	X	NA
60	CaPmal	YP_002004278	NC_011047	236	313426	313995	570	-1	NA	hypothetical protein	NA	NA	X	NA
60	PNWB_v1	c1080	Contig1D	7	4462	5043	582	-1	yqeK	hydrolase	NA	NA	X	NA
61	CaPastA	YP_456616	NC_007716	420	433046	433516	471	1	greA	transcription elongation factor GreA	K03624	COG0782	K	Transcription elongation factor
61	CaPastO	NP_950554	NC_005303	301	345470	345982	513	-1	greA	transcription elongation factor	K03624	COG0782	K	Transcription elongation factor
61	CaPaus	YP_001799092	NC_010544	382	499080	499550	471	-1	greA	transcription elongation factor GreA	K03624	COG0782	K	Transcription elongation factor
61	CaPmal	YP_002004280	NC_011047	238	314572	315060	489	-1	greA	transcription elongation factor GreA	K03624	COG0782	K	Transcription elongation factor
61	PNWB_v1	c1110	Contig1E	1	820	1356	537	-1	greA	transcription elongation factor GreA	K03624	COG0782	K	Transcription elongation factor
62	CaPastA	YP_456614	NC_007716	418	431953	432408	456	1	yqgF	Holliday junction resolvase-like protein	K07447	COG0816	L	Predicted endonuclease involved in recombination (possible Holliday junction resolvase in Mycoplasmas and B. subtilis)
62	CaPastO	NP_950556	NC_005303	303	346579	347034	456	-1	NA	Hollyday junction resolvase	K07447	COG0816	L	Predicted endonuclease involved in recombination (possible Holliday junction resolvase in Mycoplasmas and B. subtilis)
62	CaPaus	YP_001799094	NC_010544	384	500152	500574	423	-1	ruvX	Holliday junction resolvase-like protein	K07447	COG0816	L	Predicted endonuclease involved in recombination (possible Holliday junction resolvase in Mycoplasmas and B. subtilis)
62	CaPmal	YP_002004281	NC_011047	239	315103	315540	438	-1	NA	Holliday junction resolvase-like protein	K07447	COG0816	L	Predicted endonuclease involved in recombination (possible Holliday junction resolvase in Mycoplasmas and B. subtilis)
62	PNWB_v1	c1130	Contig1E	3	2049	2513	465	-1	ruvX	Holliday junction resolvase-like protein	K07447	COG0816	L	Predicted endonuclease involved in recombination (possible Holliday junction resolvase in Mycoplasmas and B. subtilis)
63	CaPastA	YP_456304	NC_007716	108	126836	128650	1815	-1	dnaG	DNA primase	K02316	COG0358	L	DNA primase (bacterial type)
63	CaPastO	NP_950879	NC_005303	623	710499	712313	1815	1	dnaG	DNA primase	K02316	COG0358	L	DNA primase (bacterial type)
63	CaPaus	YP_001799199	NC_010544	489	609757	611505	1749	-1	dnaG	DNA primase	K02316	COG0358	L	DNA primase (bacterial type)
63	CaPmal	YP_002004338	NC_011047	296	383769	385589	1821	1	dnaG1	DNA primase	K02316	COG0358	L	DNA primase (bacterial type)
63	PNWB_v1	c1150	Contig1F	1	1109	3022	1914	-1	dnaG1	DNA primase	K02316	COG0358	L	DNA primase (bacterial type)
64	CaPastA	YP_456305	NC_007716	109	128660	130018	1359	-1	grs1	glycyl-tRNA synthetase	K01880	COG0423	J	Glycyl-tRNA synthetase (class II)
64	CaPastO	NP_950878	NC_005303	622	709131	710489	1359	1	GRS1	glycyl-tRNA synthetase, class II	K01880	COG0423	J	Glycyl-tRNA synthetase (class II)
64	CaPaus	YP_001799200	NC_010544	490	611510	612868	1359	-1	GRS1	glycyl-tRNA synthetase	K01880	COG0423	J	Glycyl-tRNA synthetase (class II)
64	CaPmal	YP_002004337	NC_011047	295	382395	383753	1359	1	glyQS	glycyl-tRNA synthetase	K01880	COG0423	J	Glycyl-tRNA synthetase (class II)
64	PNWB_v1	c1160	Contig1F	2	3071	4429	1359	-1	grs1	glycyl-tRNA synthetase	K01880	COG0423	J	Glycyl-tRNA synthetase (class II)
65	CaPastA	YP_456306	NC_007716	110	130128	131015	888	-1	era	GTP-binding protein Era	K03595	COG1159	R	GTPase
65	CaPastO	NP_950877	NC_005303	621	708144	709031	888	1	era	glycyl-tRNA synthetase	K03595	COG1159	R	GTPase
65	CaPaus	YP_001799201	NC_010544	491	613186	614064	879	-1	era	GTP-binding protein Era	K03595	COG1159	R	GTPase
65	CaPmal	YP_002004335	NC_011047	293	380812	381693	882	1	era	GTP-binding protein Era	K03595	COG1159	R	GTPase
65	PNWB_v1	c1170	Contig1F	3	4450	5355	906	-1	era	GTP-binding protein Era	K03595	COG1159	R	GTPase
66	CaPastA	YP_456307	NC_007716	111	131112	131552	441	-1	NA	metal-dependent hydrolase	K07042	COG0319	R	Predicted metal-dependent hydrolase
66	CaPastO	NP_950876	NC_005303	620	707580	708020	441	1	NA	hypothetical protein	K07042	COG0319	R	Predicted metal-dependent hydrolase
66	CaPaus	YP_001799202	NC_010544	492	614080	614514	435	-1	NA	hypothetical protein	K07042	COG0319	R	Predicted metal-dependent hydrolase
66	CaPmal	YP_002004334	NC_011047	292	380349	380795	447	1	NA	hypothetical protein	K07042	COG0319	R	Predicted metal-dependent hydrolase
66	PNWB_v1	c1180	Contig1F	4	5406	5825	420	-1	yqfG	metalloprotease	K07042	COG0319	R	Predicted metal-dependent hydrolase
67	CaPastA	YP_456529	NC_007716	333	355580	357955	2376	-1	lon	ATP-dependent protease La	K01338	COG0466	O	ATP-dependent Lon protease, bacterial type
67	CaPastO	NP_950700	NC_005303	444	492103	494478	2376	-1	lon	ATP-dependent Lon protease	K01338	COG0466	O	ATP-dependent Lon protease, bacterial type
67	CaPaus	YP_001799276	NC_010544	566	716544	718907	2364	1	lon	ATP-dependent Lon protease	K01338	COG0466	O	ATP-dependent Lon protease, bacterial type
67	CaPmal	YP_002004331	NC_011047	289	377230	379566	2337	1	lonA	ATP-dependent proteinase La 1 (Lon) (Class III heat-shock protein)	K01338	COG0466	O	ATP-dependent Lon protease, bacterial type
67	PNWB_v1	c1210	Contig1G	1	545	2944	2400	-1	lon	ATP-dependent Lon protease	K01338	COG0466	O	ATP-dependent Lon protease, bacterial type
68	CaPastA	YP_456530	NC_007716	334	358039	359334	1296	-1	tig	trigger factor, PPIase	K03545	COG0544	O	FKBP-type peptidyl-prolyl cis-trans isomerase (trigger factor)
68	CaPastO	NP_950701	NC_005303	445	494565	495857	1293	-1	tig	FKBP-type peptidyl-prolyl cis-trans isomerase	K03545	COG0544	O	FKBP-type peptidyl-prolyl cis-trans isomerase (trigger factor)
68	CaPaus	YP_001799275	NC_010544	565	715233	716519	1287	1	tig	Trigger factor (TF)	K03545	COG0544	O	FKBP-type peptidyl-prolyl cis-trans isomerase (trigger factor)
68	CaPmal	YP_002004330	NC_011047	288	375828	377141	1314	1	tig	trigger factor (TF)	K03545	COG0544	O	FKBP-type peptidyl-prolyl cis-trans isomerase (trigger factor)
68	PNWB_v1	c1220	Contig1G	2	3063	4364	1302	-1	tig	trigger factor	K03545	COG0544	O	FKBP-type peptidyl-prolyl cis-trans isomerase (trigger factor)
69	CaPastA	YP_456681	NC_007716	485	511246	511566	321	-1	trxA	thioredoxin	K03671	COG0526	CO	Thiol-disulfide isomerase and thioredoxins
69	CaPastO	NP_950488	NC_005303	236	265227	265478	252	1	trxA	thioredoxin	K03671	COG0526	CO	Thiol-disulfide isomerase and thioredoxins
69	CaPaus	YP_001799343	NC_010544	633	805864	806187	324	-1	trxA	Thioredoxin	K03671	COG0526	CO	Thiol-disulfide isomerase and thioredoxins
69	CaPmal	YP_002004358	NC_011047	316	407942	408241	300	1	trxA	thioredoxin	K03671	COG0526	CO	Thiol-disulfide isomerase and thioredoxins
69	PNWB_v1	c1230	Contig1G	3	4928	5245	318	1	trxA	thioredoxin	NA	NA	X	NA
70	CaPastA	YP_456680	NC_007716	484	510361	511212	852	-1	truB	tRNA pseudouridine synthase B	K03177	COG0130	J	Pseudouridine synthase
70	CaPastO	NP_950489	NC_005303	237	265512	266363	852	1	truB	pseudouridine synthase	K03177	COG0130	J	Pseudouridine synthase
70	CaPaus	YP_001799342	NC_010544	632	804983	805837	855	-1	truB	tRNA pseudouridine synthase B	K03177	COG0130	J	Pseudouridine synthase
70	CaPmal	YP_002004359	NC_011047	317	408292	409143	852	1	truB	tRNA pseudouridine synthase B	K03177	COG0130	J	Pseudouridine synthase
70	PNWB_v1	c1250	Contig1G	5	6209	6946	738	1	truB	tRNA pseudouridine synthase B	K03177	COG0130	J	Pseudouridine synthase
71	CaPastA	YP_456447	NC_007716	251	257130	257954	825	1	qri7	O-sialoglycoprotein endopeptidase	K01409	COG0533	O	Metal-dependent proteases with possible chaperone activity
71	CaPastO	NP_950831	NC_005303	575	649334	650035	702	-1	QRI7	glycoprotein endopeptidase	K01409	COG0533	O	Metal-dependent proteases with possible chaperone activity
71	CaPaus	YP_001798776	NC_010544	66	101900	102886	987	1	gcp	putative DNA-binding/iron metalloprotein/AP endonuclease	K01409	COG0533	O	Metal-dependent proteases with possible chaperone activity
71	CaPmal	YP_002004237	NC_011047	195	260000	260989	990	1	NA	DNA-binding/iron metalloprotein/AP endonuclease	K01409	COG0533	O	Metal-dependent proteases with possible chaperone activity
71	PNWB_v1	c1260	Contig1G	6	6987	7991	1005	-1	qri7	O-sialoglycoprotein endopeptidase	K01409	COG0533	O	Metal-dependent proteases with possible chaperone activity
72	CaPastA	YP_456448	NC_007716	252	258896	259486	591	-1	NA	glycoprotease family protein	NA	NA	X	NA
72	CaPastO	NP_950753	NC_005303	497	567555	568268	714	1	NA	hypothetical protein	NA	NA	X	NA
72	CaPaus	YP_001798882	NC_010544	172	255103	255747	645	1	NA	hypothetical protein	NA	NA	X	NA
72	CaPmal	YP_002004236	NC_011047	194	259427	259981	555	1	NA	glycoprotease family protein	NA	NA	X	NA
72	PNWB_v1	c1280	Contig1G	8	10796	11422	627	-1	NA	glycoprotease family protein	NA	NA	X	NA
73	CaPastA	YP_456449	NC_007716	253	259578	260066	489	-1	NA	P-loop hydrolase	K06925	COG0802	R	Predicted ATPase or kinase
73	CaPastO	NP_950752	NC_005303	496	567058	567558	501	1	NA	hypothetical protein	K06925	COG0802	R	Predicted ATPase or kinase
73	CaPaus	YP_001798881	NC_010544	171	254577	255047	471	1	NA	hypothetical protein	K06925	COG0802	R	Predicted ATPase or kinase
73	CaPmal	YP_002004235	NC_011047	193	258929	259375	447	1	NA	ATPase	K06925	COG0802	R	Predicted ATPase or kinase
73	PNWB_v1	c1290	Contig1G	9	11409	11873	465	-1	NA	putative ATP-binding protein	K06925	COG0802	R	Predicted ATPase or kinase
74	CaPastA	YP_456450	NC_007716	254	260157	262664	2508	-1	gyrA	DNA gyrase subunit A	K02469	COG0188	L	Type IIA topoisomerase (DNA gyrase/topo II, topoisomerase IV), A subunit
74	CaPastO	NP_950751	NC_005303	495	564456	566963	2508	1	gyrA	DNA gyrase alpha subunit	K02469	COG0188	L	Type IIA topoisomerase (DNA gyrase/topo II, topoisomerase IV), A subunit
74	CaPaus	YP_001798880	NC_010544	170	252125	254584	2460	1	gyrA	DNA gyrase alpha subunit	K02469	COG0188	L	Type IIA topoisomerase (DNA gyrase/topo II, topoisomerase IV), A subunit
74	CaPmal	YP_002004233	NC_011047	191	255208	257724	2517	1	gyrA	DNA gyrase subunit alpha	K02469	COG0188	L	Type IIA topoisomerase (DNA gyrase/topo II, topoisomerase IV), A subunit
74	PNWB_v1	c1300	Contig1G	10	12273	14813	2541	-1	gyrA	DNA gyrase subunit A	K02469	COG0188	L	Type IIA topoisomerase (DNA gyrase/topo II, topoisomerase IV), A subunit
75	CaPastA	YP_456451	NC_007716	255	262763	264778	2016	-1	gyrB	DNA gyrase subunit B	K02470	COG0187	L	Type IIA topoisomerase (DNA gyrase/topo II, topoisomerase IV), B subunit
75	CaPastO	NP_950750	NC_005303	494	562356	564371	2016	1	gyrB	DNA gyrase beta subunit	K02470	COG0187	L	Type IIA topoisomerase (DNA gyrase/topo II, topoisomerase IV), B subunit
75	CaPaus	YP_001798879	NC_010544	169	250087	252075	1989	1	gyrB	DNA gyrase beta subunit	K02470	COG0187	L	Type IIA topoisomerase (DNA gyrase/topo II, topoisomerase IV), B subunit
75	CaPmal	YP_002004232	NC_011047	190	253261	255162	1902	1	gyrB	DNA gyrase subunit beta	K02470	COG0187	L	Type IIA topoisomerase (DNA gyrase/topo II, topoisomerase IV), B subunit
75	PNWB_v1	c1310	Contig1G	11	14898	16844	1947	-1	gyrB	DNA gyrase subunit B	K02470	COG0187	L	Type IIA topoisomerase (DNA gyrase/topo II, topoisomerase IV), B subunit
76	CaPastA	YP_456222	NC_007716	26	34482	35534	1053	1	nrdF	ribonucleotide-diphosphate reductase subunit beta	K00526	COG0208	F	Ribonucleotide reductase, beta subunit
76	CaPastO	NP_950307	NC_005303	55	70037	71089	1053	1	nrdF	ribonucleotide reductase beta subunit	K00526	COG0208	F	Ribonucleotide reductase, beta subunit
76	CaPaus	YP_001798790	NC_010544	80	122230	123264	1035	1	nrdF	ribonucleotide-diphosphate reductase subunit beta	K00526	COG0208	F	Ribonucleotide reductase, beta subunit
76	CaPmal	YP_002004223	NC_011047	181	239456	240502	1047	-1	nrdF	ribonucleotide-diphosphate reductase subunit beta	K00526	COG0208	F	Ribonucleotide reductase, beta subunit
76	PNWB_v1	c1350	Contig1G	14	20825	21853	1029	-1	nrdF	ribonucleotide-diphosphate reductase subunit beta	K00526	COG0208	F	Ribonucleotide reductase, beta subunit
77	CaPastA	YP_456249	NC_007716	53	61363	62010	648	1	pgsA	CDP-diacylglycerol-glycerol-3-phosphate 3-phosphatidyltransferase	K00995	COG0558	I	Phosphatidylglycerophosphate synthase
77	CaPastO	NP_950970	NC_005303	713	809984	810643	660	-1	NA	phosphatidylglycerophosphate synthase	K00995	COG0558	I	Phosphatidylglycerophosphate synthase
77	CaPaus	YP_001799371	NC_010544	661	835645	836295	651	-1	pgsA	Phosphatidylglycerophosphate synthase	K00995	COG0558	I	Phosphatidylglycerophosphate synthase
77	CaPmal	YP_002004174	NC_011047	132	172898	173554	657	1	pgsA	phosphatidylglycerophosphate synthase	K00995	COG0558	I	Phosphatidylglycerophosphate synthase
77	PNWB_v1	c1370	Contig1G	16	23261	23917	657	-1	pgsA	CDP-diacylglycerol--glycerol-3-phosphate 3-phosphatidyltransferase	K00995	COG0558	I	Phosphatidylglycerophosphate synthase
78	CaPastA	YP_456517	NC_007716	321	342215	344230	2016	1	lig	NAD-dependent DNA ligase	K01972	COG0272	L	NAD-dependent DNA ligase (contains BRCT domain type II)
78	CaPastO	NP_950690	NC_005303	433	478512	480527	2016	1	lig	NAD-dependent DNA ligase	K01972	COG0272	L	NAD-dependent DNA ligase (contains BRCT domain type II)
78	CaPaus	YP_001799329	NC_010544	619	789253	791265	2013	1	ligA	NAD-dependent DNA ligase	K01972	COG0272	L	NAD-dependent DNA ligase (contains BRCT domain type II)
78	CaPmal	YP_002004308	NC_011047	266	351116	353095	1980	1	lig	NAD-dependent DNA ligase	K01972	COG0272	L	NAD-dependent DNA ligase (contains BRCT domain type II)
78	PNWB_v1	c1390	Contig1G	18	26139	28151	2013	1	lig	NAD-dependent DNA ligase	K01972	COG0272	L	NAD-dependent DNA ligase (contains BRCT domain type II)
79	CaPastA	YP_456519	NC_007716	323	345316	345696	381	1	acpS	holo-[acyl-carrier-protein] synthase	K00997	COG0736	I	Phosphopantetheinyl transferase (holo-ACP synthase)
79	CaPastO	NP_950692	NC_005303	435	481644	482027	384	1	acpS	phosphopantetheinyl transferase	K00997	COG0736	I	Phosphopantetheinyl transferase (holo-ACP synthase)
79	CaPaus	YP_001799392	NC_010544	682	877074	877448	375	-1	acpS	Phosphopantetheinyl transferase (holo-ACP synthase)	K00997	COG0736	I	Phosphopantetheinyl transferase (holo-ACP synthase)
79	CaPmal	YP_002004327	NC_011047	285	373424	373777	354	-1	acpS	Holo-[acyl-carrier-protein] synthase	K00997	COG0736	I	Phosphopantetheinyl transferase (holo-ACP synthase)
79	PNWB_v1	c1400	Contig1G	19	28169	28507	339	1	acpS	holo-[acyl-carrier-protein] synthase	K00997	COG0736	I	Phosphopantetheinyl transferase (holo-ACP synthase)
80	CaPastA	YP_456430	NC_007716	234	243616	244419	804	1	NA	hypothetical protein	NA	NA	X	NA
80	CaPastA	YP_456568	NC_007716	372	387455	388006	552	-1	NA	hypothetical protein	NA	NA	X	NA
80	CaPaus	YP_001799001	NC_010544	291	397338	398960	1623	-1	NA	hypothetical protein	NA	NA	X	NA
80	CaPmal	YP_002004443	NC_011047	401	487866	489506	1641	1	NA	hypothetical protein	NA	NA	X	NA
80	PNWB_v1	c1430	Contig1G	22	30462	30800	339	1	NA	hypothetical protein	NA	NA	X	NA
81	CaPastA	YP_456804	NC_007716	608	632003	633058	1056	1	cbf	CMP-binding factor	K03698	COG3481	R	Predicted HD-superfamily hydrolase
81	CaPastO	NP_950353	NC_005303	101	125929	126663	735	-1	NA	hypothetical protein	K03698	COG3481	R	Predicted HD-superfamily hydrolase
81	CaPaus	YP_001799285	NC_010544	575	728697	729647	951	-1	cbf1	Cmp binding factor 1	K03698	COG3481	R	Predicted HD-superfamily hydrolase
81	CaPmal	YP_002004273	NC_011047	231	310746	311663	918	1	NA	Cmp binding factor 1	K03698	COG3481	R	Predicted HD-superfamily hydrolase
81	PNWB_v1	c1520	Contig1G	30	41962	42909	948	-1	cbf	CMP-binding factor	K03698	COG3481	R	Predicted HD-superfamily hydrolase
82	CaPastA	YP_456803	NC_007716	607	630708	631931	1224	1	pcnB	poly(A) polymerase	K00970	COG0617	J	tRNA nucleotidyltransferase/poly(A) polymerase
82	CaPastO	NP_950354	NC_005303	102	127074	128312	1239	-1	pcnB	tRNA nucleotidyltransferase/polyA polymerase	K00970	COG0617	J	tRNA nucleotidyltransferase/poly(A) polymerase
82	CaPaus	YP_001799286	NC_010544	576	729634	730872	1239	-1	pcnB	Poly(A) polymerase	K00970	COG0617	J	tRNA nucleotidyltransferase/poly(A) polymerase
82	CaPmal	YP_002004272	NC_011047	230	309576	310739	1164	1	cca	CCA-adding enzyme (tRNA adenylyl-/cytidylyl-transferase) (tRNA CCA-pyrophosphorylase)	K00970	COG0617	J	tRNA nucleotidyltransferase/poly(A) polymerase
82	PNWB_v1	c1530	Contig1G	31	42999	43907	909	-1	pcnB	poly(A) polymerase	K00970	COG0617	J	tRNA nucleotidyltransferase/poly(A) polymerase
83	CaPastA	YP_456265	NC_007716	69	82362	83180	819	1	dnaC	DNA replication protein DnaC	K11144	COG1484	L	DNA replication protein
83	CaPastO	NP_950924	NC_005303	667	762974	763792	819	-1	dnaC	DNA replication protein	K11144	COG1484	L	DNA replication protein
83	CaPaus	YP_001799376	NC_010544	666	846475	847299	825	-1	NA	Putative DNA replication protein	K11144	COG1484	L	DNA replication protein
83	CaPmal	YP_002004109	NC_011047	67	83711	84511	801	-1	dnaC	DNA replication protein	K11144	COG1484	L	DNA replication protein
83	PNWB_v1	c1560	Contig1G	34	46688	47548	861	-1	dnaC	DNA replication protein	K11144	COG1484	L	DNA replication protein
84	CaPastA	YP_456264	NC_007716	68	81084	82277	1194	1	dnaB	replication initiation and membrane attachment protein	K03346	COG3611	L	Replication initiation/membrane attachment protein
84	CaPastO	NP_950925	NC_005303	668	763875	765068	1194	-1	dnaB	replication initiation/membrane attachment	K03346	COG3611	L	Replication initiation/membrane attachment protein
84	CaPaus	YP_001799377	NC_010544	667	848017	849186	1170	-1	dnaB2	Replication initiation/membrane attachment protein	K03346	COG3611	L	Replication initiation/membrane attachment protein
84	CaPmal	YP_002004110	NC_011047	68	84515	85741	1227	-1	dnaB2	replicative DNA helicase DnaB-like	K03346	COG3611	L	Replication initiation/membrane attachment protein
84	PNWB_v1	c1580	Contig1G	35	48509	49732	1224	-1	dnaB2	replication initiation and membrane attachment protein	K03346	COG3611	L	Replication initiation/membrane attachment protein
85	CaPastA	YP_456263	NC_007716	67	80198	81028	831	1	nei	formamidopyrimidine-DNA glycosylase	K10563	COG0266	L	Formamidopyrimidine-DNA glycosylase
85	CaPastO	NP_950926	NC_005303	669	765122	765952	831	-1	nei	formamidopyrimidine-DNA glycosylase	K10563	COG0266	L	Formamidopyrimidine-DNA glycosylase
85	CaPaus	YP_001799378	NC_010544	668	849203	850018	816	-1	mutM	Formamidopyrimidine-DNA glycosylase	K10563	COG0266	L	Formamidopyrimidine-DNA glycosylase
85	CaPmal	YP_002004111	NC_011047	69	85757	86569	813	-1	nei	formamidopyrimidine-DNA glycosylase	K10563	COG0266	L	Formamidopyrimidine-DNA glycosylase
85	PNWB_v1	c1610	Contig1G	36	52372	52884	513	-1	mutM	formamidopyrimidine-DNA glycosylase	K10563	COG0266	L	Formamidopyrimidine-DNA glycosylase
86	CaPastA	YP_456297	NC_007716	101	119147	120838	1692	1	NA	metallo-beta-lactamase superfamily hydrolase	K12574	COG0595	R	Predicted hydrolase of the metallo-beta-lactamase superfamily
86	CaPastO	NP_950885	NC_005303	629	717468	719159	1692	-1	NA	hypothetical protein	K12574	COG0595	R	Predicted hydrolase of the metallo-beta-lactamase superfamily
86	CaPaus	YP_001798720	NC_010544	10	13226	14914	1689	1	NA	Metallo-beta-lactamase family protein	K12574	COG0595	R	Predicted hydrolase of the metallo-beta-lactamase superfamily
86	CaPmal	YP_002004248	NC_011047	206	280047	281741	1695	1	NA	metallo-beta-lactamase superfamily hydrolase	K12574	COG0595	R	Predicted hydrolase of the metallo-beta-lactamase superfamily
86	PNWB_v1	c1640	Contig1G	39	54294	55979	1686	-1	NA	metallo-beta-lactamase family protein	K12574	COG0595	R	Predicted hydrolase of the metallo-beta-lactamase superfamily
87	CaPastA	YP_456294	NC_007716	98	114437	116161	1725	1	NA	Zn-dependent hydrolase	NA	NA	X	NA
87	CaPastO	NP_950889	NC_005303	632	722189	723913	1725	-1	NA	hypothetical protein	NA	NA	X	NA
87	CaPaus	YP_001798715	NC_010544	5	8338	10023	1686	1	NA	Putative hydrolase of the metallo-beta-lactamase superfamily	NA	NA	X	NA
87	CaPmal	YP_002004247	NC_011047	205	278306	279985	1680	1	NA	metallo-beta-lactamase family protein	NA	NA	X	NA
87	PNWB_v1	c1650	Contig1G	40	55988	57733	1746	-1	NA	Zn-dependent hydrolase	NA	NA	X	NA
88	CaPastA	YP_456608	NC_007716	412	423992	425008	1017	1	lplA	lipoate-protein ligase A	K03800	COG0095	H	Lipoate-protein ligase A
88	CaPastO	NP_950561	NC_005303	308	354084	355100	1017	-1	lplA	lipoate-protein ligase A	K03800	COG0095	H	Lipoate-protein ligase A
88	CaPaus	YP_001799122	NC_010544	412	537120	538130	1011	1	lplA	Lipoate-protein ligase A	K03800	COG0095	H	Lipoate-protein ligase A
88	CaPmal	YP_002004245	NC_011047	203	276002	277015	1014	1	lplA	lipoate-protein ligase A	K03800	COG0095	H	Lipoate-protein ligase A
88	PNWB_v1	c1680	Contig1G	43	59566	60564	999	-1	lplA	lipoate-protein ligase A	K03800	COG0095	H	Lipoate-protein ligase A
89	CaPastA	YP_456258	NC_007716	62	72363	73430	1068	1	dnaJ	molecular chaperone DnaJ	K03686	COG0484	O	DnaJ-class molecular chaperone with C-terminal Zn finger domain
89	CaPastO	NP_950955	NC_005303	698	794434	795207	774	-1	dnaJ	molecular chaperone DnaJ	K03686	COG0484	O	DnaJ-class molecular chaperone with C-terminal Zn finger domain
89	CaPaus	YP_001799139	NC_010544	429	564063	565106	1044	-1	dnaJ	Chaperone protein DnaJ	K03686	COG0484	O	DnaJ-class molecular chaperone with C-terminal Zn finger domain
89	CaPmal	YP_002004244	NC_011047	202	274790	275896	1107	1	dnaJ	chaperone protein	K03686	COG0484	O	DnaJ-class molecular chaperone with C-terminal Zn finger domain
89	PNWB_v1	c1690	Contig1G	44	61288	62394	1107	-1	dnaJ	molecular chaperone DnaJ	K03686	COG0484	O	DnaJ-class molecular chaperone with C-terminal Zn finger domain
90	CaPastA	YP_456257	NC_007716	61	70379	72226	1848	1	dnaK	molecular chaperone DnaK	K04043	COG0443	O	Molecular chaperone
90	CaPastO	NP_950956	NC_005303	699	795359	797224	1866	-1	dnaK	molecular chaperone DnaK	K04043	COG0443	O	Molecular chaperone
90	CaPaus	YP_001799140	NC_010544	430	565175	567031	1857	-1	dnaK	molecular chaperone DnaK	K04043	COG0443	O	Molecular chaperone
90	CaPmal	YP_002004243	NC_011047	201	272835	274682	1848	1	dnaK	molecular chaperone DnaK	K04043	COG0443	O	Molecular chaperone
90	PNWB_v1	c1700	Contig1G	45	62501	64369	1869	-1	dnaK	molecular chaperone DnaK	K04043	COG0443	O	Molecular chaperone
91	CaPastA	YP_456256	NC_007716	60	69688	70413	726	1	grpE	molecular chaperone GrpE protein	K03687	COG0576	O	Molecular chaperone GrpE (heat shock protein)
91	CaPastO	NP_950957	NC_005303	700	797190	797933	744	-1	grpE	molecular chaperone GrpE	K03687	COG0576	O	Molecular chaperone GrpE (heat shock protein)
91	CaPaus	YP_001799141	NC_010544	431	567018	567686	669	-1	grpE	Molecular chaperone GrpE (heat shock protein)	K03687	COG0576	O	Molecular chaperone GrpE (heat shock protein)
91	CaPmal	YP_002004242	NC_011047	200	272144	272851	708	1	grpE	protein GrpE (HSP-70 cofactor)	K03687	COG0576	O	Molecular chaperone GrpE (heat shock protein)
91	PNWB_v1	c1710	Contig1G	46	64362	65144	783	-1	grpE	molecular chaperone GrpE (heat shock protein)	K03687	COG0576	O	Molecular chaperone GrpE (heat shock protein)
92	CaPastA	YP_456255	NC_007716	59	68483	69517	1035	1	hrcA	heat-inducible transcription repressor	K03705	COG1420	K	Transcriptional regulator of heat shock gene
92	CaPastO	NP_950958	NC_005303	701	798155	799183	1029	-1	hrcA	heat-inducible transcription repressor	K03705	COG1420	K	Transcriptional regulator of heat shock gene
92	CaPaus	YP_001799142	NC_010544	432	567716	568738	1023	-1	hrcA	Heat-inducible transcription repressor HrcA	K03705	COG1420	K	Transcriptional regulator of heat shock gene
92	CaPmal	YP_002004241	NC_011047	199	271083	272114	1032	1	hrcA	heat-inducible transcription repressor	K03705	COG1420	K	Transcriptional regulator of heat shock gene
92	PNWB_v1	c1720	Contig1G	47	65215	66282	1068	-1	hrcA	heat-inducible transcription repressor	K03705	COG1420	K	Transcriptional regulator of heat shock gene
93	CaPastA	YP_456212	NC_007716	16	18204	21278	3075	-1	NA	hypothetical protein	NA	NA	X	NA
93	CaPastO	NP_950279	NC_005303	27	34179	37277	3099	-1	NA	hypothetical protein	NA	NA	X	NA
93	CaPaus	YP_001798816	NC_010544	106	160972	163845	2874	1	NA	hypothetical protein	NA	NA	X	NA
93	CaPmal	YP_002004298	NC_011047	256	337936	340803	2868	1	NA	hypothetical protein	NA	NA	X	NA
93	PNWB_v1	c1730	Contig1G	48	66971	69844	2874	1	NA	hypothetical protein	NA	NA	X	NA
94	CaPastA	YP_456624	NC_007716	428	436374	437183	810	-1	plsC	1-acyl-sn-glycerol-3-phosphate acyltransferase	K00655	COG0204	I	1-acyl-sn-glycerol-3-phosphate acyltransferase
94	CaPastO	NP_950547	NC_005303	294	341720	342529	810	1	plsC	1-acyl-sn-glycerol-3-phosphate acyltransferase	K00655	COG0204	I	1-acyl-sn-glycerol-3-phosphate acyltransferase
94	CaPaus	YP_001798769	NC_010544	59	93847	94635	789	1	plsC	1-acyl-sn-glycerol-3-phosphate acyltransferase	K00655	COG0204	I	1-acyl-sn-glycerol-3-phosphate acyltransferase
94	CaPmal	YP_002004355	NC_011047	313	404312	405109	798	1	plsC	1-acyl-sn-glycerol-3-phosphate acyltransferase	K00655	COG0204	I	1-acyl-sn-glycerol-3-phosphate acyltransferase
94	PNWB_v1	c1740	Contig1G	49	69910	70704	795	-1	plsC	1-acyl-sn-glycerol-3-phosphate acyltransferase	K00655	COG0204	I	1-acyl-sn-glycerol-3-phosphate acyltransferase
95	CaPastA	YP_456625	NC_007716	429	437177	437668	492	-1	folA	dihydrofolate reductase	K00287	COG0262	H	Dihydrofolate reductase
95	CaPastO	NP_950546	NC_005303	293	341235	341726	492	1	folA	dihydrofolate reductase	K00287	COG0262	H	Dihydrofolate reductase
95	CaPaus	YP_001798768	NC_010544	58	93356	93853	498	1	folA	Dihydrofolate reductase	K00287	COG0262	H	Dihydrofolate reductase
95	CaPmal	YP_002004354	NC_011047	312	403794	404267	474	1	folA	dihydrofolate reductase	K00287	COG0262	H	Dihydrofolate reductase
95	PNWB_v1	c1760	Contig1G	50	71878	72378	501	-1	folA	dihydrofolate reductase	K00287	COG0262	H	Dihydrofolate reductase
96	CaPastA	YP_456626	NC_007716	430	437665	438531	867	-1	thyA	thymidylate synthase	K00560	COG0207	F	Thymidylate synthase
96	CaPastO	NP_950545	NC_005303	292	340372	341238	867	1	thyA	thymidylate synthase	K00560	COG0207	F	Thymidylate synthase
96	CaPaus	YP_001798767	NC_010544	57	92493	93359	867	1	thyA	thymidylate synthase	K00560	COG0207	F	Thymidylate synthase
96	CaPmal	YP_002004353	NC_011047	311	402931	403797	867	1	thyA	thymidylate synthase	K00560	COG0207	F	Thymidylate synthase
96	PNWB_v1	c1770	Contig1G	51	72375	73241	867	-1	thyA	thymidylate synthase	K00560	COG0207	F	Thymidylate synthase
97	CaPastA	YP_456756	NC_007716	560	579540	580772	1233	-1	ackA	acetate kinase	K00925	COG0282	C	Acetate kinase
97	CaPastO	NP_950411	NC_005303	159	189434	190666	1233	1	ackA	acetate kinase	K00925	COG0282	C	Acetate kinase
97	CaPaus	YP_001798799	NC_010544	89	134752	135942	1191	1	ackA	acetate kinase	K00925	COG0282	C	Acetate kinase
97	CaPmal	YP_002004352	NC_011047	310	401080	402255	1176	1	ackA	acetate kinase	K00925	COG0282	C	Acetate kinase
97	PNWB_v1	c1820	Contig1G	52	77130	78332	1203	-1	ackA	acetate kinase	K00925	COG0282	C	Acetate kinase
98	CaPastA	YP_456248	NC_007716	52	59226	60761	1536	1	citS	malate-sodium symport	NA	NA	X	NA
98	CaPastO	NP_950972	NC_005303	715	811261	812376	1116	-1	citS	malate/citrate symporter	NA	NA	X	NA
98	CaPaus	YP_001799327	NC_010544	617	785343	786809	1467	-1	citS	Putative malate/citrate symporter	NA	NA	X	NA
98	CaPmal	YP_002004144	NC_011047	102	139660	141141	1482	-1	mleP	malate/Na+ symporter	NA	NA	X	NA
98	PNWB_v1	c1880	Contig1H	2	1525	3015	1491	-1	citS1	malate/citrate symporter	NA	NA	X	NA
99	CaPastA	YP_456780	NC_007716	584	606145	606687	543	-1	thiJ	4-methyl-5(B-hydroxyethyl)-thiazole monophosphate biosynthesis enzyme	K03152	COG0693	R	Putative intracellular protease/amidase
99	CaPastO	NP_950389	NC_005303	137	162349	162891	543	1	NA	hypothetical protein	K03152	COG0693	R	Putative intracellular protease/amidase
99	CaPaus	YP_001799081	NC_010544	371	491679	492221	543	1	thiJ	Putative intracellular protease/amidase	K03152	COG0693	R	Putative intracellular protease/amidase
99	CaPmal	YP_002004271	NC_011047	229	308876	309388	513	-1	thiJ	4-methyl-5(beta-hydroxyethyl)-thiazole monophosphate synthesis protein	K03152	COG0693	R	Putative intracellular protease/amidase
99	PNWB_v1	c1890	Contig1H	3	3093	3608	516	-1	thiJ	4-methyl-5(B-hydroxyethyl)-thiazole monophosphate biosynthesis enzyme	K03152	COG0693	R	Putative intracellular protease/amidase
100	CaPastA	YP_456247	NC_007716	51	58057	59229	1173	1	sfcA	NAD-dependent malic enzyme	K00027	COG0281	C	Malic enzyme
100	CaPastO	NP_950973	NC_005303	716	812795	813967	1173	-1	sfcA	malic enzyme	K00027	COG0281	C	Malic enzyme
100	CaPaus	YP_001799328	NC_010544	618	786806	787978	1173	-1	sfcA	Malate dehydrogenase	K00027	COG0281	C	Malic enzyme
100	CaPmal	YP_002004478	NC_011047	436	535373	536545	1173	1	sfcA	NADP-dependent malic enzyme	K00027	COG0281	C	Malic enzyme
100	PNWB_v1	c1900	Contig1H	4	3674	4834	1161	-1	sfcA	malic enzyme	K00027	COG0281	C	Malic enzyme
101	CaPastA	YP_456724	NC_007716	528	540669	541472	804	1	dppD	dipeptide transport ATP-binding protein DppD	K02031	COG0444;COG1123	EPR	ABC-type dipeptide/oligopeptide/nickel transport system, ATPase component;ATPase components of various ABC-type transport systems, contain duplicated ATPase
101	CaPastO	NP_950444	NC_005303	192	233256	234059	804	-1	dppD	ABC-type dipeptide/oligopeptide transport system, ATPase component	K02031	COG0444;COG1123	EPR	ABC-type dipeptide/oligopeptide/nickel transport system, ATPase component;ATPase components of various ABC-type transport systems, contain duplicated ATPase
101	CaPaus	YP_001799315	NC_010544	605	766907	767695	789	1	NA	ABC-type peptide/nickel transport system ATP-binding protein	K02031	COG0444;COG1123	EPR	ABC-type dipeptide/oligopeptide/nickel transport system, ATPase component;ATPase components of various ABC-type transport systems, contain duplicated ATPase
101	CaPmal	YP_002004104	NC_011047	62	77564	78496	933	-1	dppD	dipeptide/oligopeptide ABC transporter ATPase	K02031	COG0444;COG1123	EPR	ABC-type dipeptide/oligopeptide/nickel transport system, ATPase component;ATPase components of various ABC-type transport systems, contain duplicated ATPase
101	PNWB_v1	c1920	Contig1H	6	7416	8351	936	-1	dppD	ABC-type dipeptide/oligopeptide transport system, ATPase component	K15583	NA	X	NA
102	CaPastA	YP_456723	NC_007716	527	539641	540657	1017	1	dppF	dipeptide transport ATP-binding protein DppF	K10823	NA	X	NA
102	CaPastO	NP_950445	NC_005303	193	234071	234652	582	-1	NA	hypothetical protein	NA	NA	X	NA
102	CaPaus	YP_001799314	NC_010544	604	765927	766904	978	1	NA	ABC-type peptide/nickel transport system ATP-binding protein	K10823	NA	X	NA
102	CaPmal	YP_002004105	NC_011047	63	78514	79788	1275	-1	dppF	dipeptide transport ATP-binding protein	K10823	NA	X	NA
102	PNWB_v1	c1930	Contig1H	7	8603	9427	825	-1	dppF	ABC-type dipeptide/oligopeptide transport system, ATPase component	K10823	NA	X	NA
103	CaPastA	YP_456727	NC_007716	531	544149	545018	870	1	dppC	ABC-type dipeptide transport system, permease protein DppC	K02034	COG1173	EP	ABC-type dipeptide/oligopeptide/nickel transport systems, permease components
103	CaPastO	NP_950441	NC_005303	189	226296	227099	804	-1	dppC	ABC-type dipeptide/oligopeptide system, permease	K02034	COG1173	EP	ABC-type dipeptide/oligopeptide/nickel transport systems, permease components
103	CaPaus	YP_001799319	NC_010544	609	773043	773903	861	1	NA	ABC-type peptide/nickel transport system permease protein	K02034	COG1173	EP	ABC-type dipeptide/oligopeptide/nickel transport systems, permease components
103	CaPmal	YP_002004106	NC_011047	64	79805	80650	846	-1	dppC	ABC-type dipeptide transport system, permease protein	K02034	COG1173	EP	ABC-type dipeptide/oligopeptide/nickel transport systems, permease components
103	PNWB_v1	c1940	Contig1H	8	9479	10288	810	-1	dppC	ABC-type peptide/nickel transport system, permease component	K02034	COG1173	EP	ABC-type dipeptide/oligopeptide/nickel transport systems, permease components
104	CaPastA	YP_456726	NC_007716	530	543186	544133	948	1	dppB	ABC-type dipeptide transport system, permease protein DppB	K02033	COG0601	EP	ABC-type dipeptide/oligopeptide/nickel transport systems, permease components
104	CaPastO	NP_950442	NC_005303	190	227128	228054	927	-1	dppB	ABC-type dipeptide/oligopeptide transport system, permease component	K02033	COG0601	EP	ABC-type dipeptide/oligopeptide/nickel transport systems, permease components
104	CaPaus	YP_001799318	NC_010544	608	772078	773010	933	1	NA	ABC-type peptide/nickel transport system permease protein	K02033	COG0601	EP	ABC-type dipeptide/oligopeptide/nickel transport systems, permease components
104	CaPmal	YP_002004107	NC_011047	65	80671	81600	930	-1	dppB	dipeptide/oligopeptide ABC transporter permease	K02033	COG0601	EP	ABC-type dipeptide/oligopeptide/nickel transport systems, permease components
104	PNWB_v1	c1950	Contig1H	9	10350	11279	930	-1	dppB	ABC-type dipeptide/oligopeptide transport system, permease component	K15581	NA	X	NA
105	CaPastA	YP_456512	NC_007716	316	335373	337178	1806	-1	argS	arginyl-tRNA synthetase	K01887	COG0018	J	Arginyl-tRNA synthetase
105	CaPastO	NP_950707	NC_005303	451	505066	506739	1674	1	argS	arginyl-tRNA synthetase	K01887	COG0018	J	Arginyl-tRNA synthetase
105	CaPaus	YP_001799125	NC_010544	415	540757	542430	1674	1	argS	Arginyl-tRNA synthetase	K01887	COG0018	J	Arginyl-tRNA synthetase
105	CaPmal	YP_002004464	NC_011047	422	522820	524517	1698	1	argS	arginyl-tRNA synthetase	K01887	COG0018	J	Arginyl-tRNA synthetase
105	PNWB_v1	c1970	Contig1H	11	13274	14968	1695	-1	argS	arginyl-tRNA synthetase	K01887	COG0018	J	Arginyl-tRNA synthetase
106	CaPastA	YP_456786	NC_007716	590	610191	611111	921	-1	rluA	ribosomal large subunit pseudouridine synthase D	K06180	COG0564	J	Pseudouridylate synthases, 23S RNA-specific
106	CaPastO	NP_950383	NC_005303	131	157887	158798	912	1	rluA	pseudouridylate synthases	K06180	COG0564	J	Pseudouridylate synthases, 23S RNA-specific
106	CaPaus	YP_001799075	NC_010544	365	487510	488418	909	1	rluA	Pseudouridine synthase	K06180	COG0564	J	Pseudouridylate synthases, 23S RNA-specific
106	CaPmal	YP_002004307	NC_011047	265	350165	351064	900	1	rluA	pseudouridine synthase	K06180	COG0564	J	Pseudouridylate synthases, 23S RNA-specific
106	PNWB_v1	c1980	Contig1H	12	15107	16000	894	-1	rluA	pseudouridylate synthase	K06180	COG0564	J	Pseudouridylate synthases, 23S RNA-specific
107	CaPastA	YP_456828	NC_007716	632	657292	658566	1275	-1	serS	seryl-tRNA synthetase	K01875	COG0172	J	Seryl-tRNA synthetase
107	CaPastO	NP_950335	NC_005303	83	106430	107704	1275	1	serS	seryl-tRNA synthetase	K01875	COG0172	J	Seryl-tRNA synthetase
107	CaPaus	YP_001799181	NC_010544	471	590081	591337	1257	-1	serS	seryl-tRNA synthetase	K01875	COG0172	J	Seryl-tRNA synthetase
107	CaPmal	YP_002004172	NC_011047	130	170999	172270	1272	-1	serS	seryl-tRNA synthetase	K01875	COG0172	J	Seryl-tRNA synthetase
107	PNWB_v1	c2000	Contig1H	14	18196	19485	1290	-1	serS	seryl-tRNA synthetase	K01875	COG0172	J	Seryl-tRNA synthetase
108	CaPastA	YP_456829	NC_007716	633	658980	659240	261	-1	rpsT	30S ribosomal protein S20	K02968	COG0268	J	Ribosomal protein S20
108	CaPastO	NP_950333	NC_005303	81	105231	105491	261	1	rpsT	ribosomal protein S20	K02968	COG0268	J	Ribosomal protein S20
108	CaPaus	YP_001799184	NC_010544	474	591964	592230	267	-1	rpsT	30S ribosomal protein S20	K02968	COG0268	J	Ribosomal protein S20
108	CaPmal	YP_002004173	NC_011047	131	172321	172584	264	-1	rpsT	30S ribosomal protein S20	K02968	COG0268	J	Ribosomal protein S20
108	PNWB_v1	c2010	Contig1H	15	19576	19836	261	-1	rpsT	30S ribosomal protein S20	NA	NA	X	NA
109	CaPastA	YP_456770	NC_007716	574	595412	595870	459	-1	smpB	SsrA-binding protein	K03664	COG0691	O	tmRNA-binding protein
109	CaPastO	NP_950398	NC_005303	146	172267	172725	459	1	smpB	tmRNA-binding protein	K03664	COG0691	O	tmRNA-binding protein
109	CaPaus	YP_001799188	NC_010544	478	596833	597363	531	1	smpB	SsrA-binding protein	K03664	COG0691	O	tmRNA-binding protein
109	CaPmal	YP_002004361	NC_011047	319	409994	410449	456	-1	smpB	SsrA-binding protein	K03664	COG0691	O	tmRNA-binding protein
109	PNWB_v1	c2030	Contig1H	17	20891	21340	450	-1	smpB	SsrA-binding protein	K03664	COG0691	O	tmRNA-binding protein
110	CaPastA	YP_456771	NC_007716	575	596109	596663	555	-1	ppa	inorganic pyrophosphatase	K01507	COG0221;COG1227	C	Inorganic pyrophosphatase;Inorganic pyrophosphatase/exopolyphosphatase
110	CaPastO	NP_950397	NC_005303	145	171465	172019	555	1	ppa	inorganic pyrophosphatase	K01507	COG0221;COG1227	C	Inorganic pyrophosphatase;Inorganic pyrophosphatase/exopolyphosphatase
110	CaPaus	YP_001799187	NC_010544	477	596233	596763	531	1	ppa	Inorganic pyrophosphatase	K01507	COG0221;COG1227	C	Inorganic pyrophosphatase;Inorganic pyrophosphatase/exopolyphosphatase
110	CaPmal	YP_002004362	NC_011047	320	410634	411167	534	-1	ppa	inorganic pyrophosphatase	K01507	COG0221;COG1227	C	Inorganic pyrophosphatase;Inorganic pyrophosphatase/exopolyphosphatase
110	PNWB_v1	c2040	Contig1H	18	21373	21903	531	-1	ppa	inorganic pyrophosphatase	K01507	COG0221;COG1227	C	Inorganic pyrophosphatase;Inorganic pyrophosphatase/exopolyphosphatase
111	CaPastA	YP_456668	NC_007716	472	498380	499921	1542	-1	yidC	60 kDa inner membrane protein	K03217	COG0706	U	Preprotein translocase subunit YidC
111	CaPastO	NP_950501	NC_005303	249	277256	278833	1578	1	yidC	preprotein translocase subunit YidC	K03217	COG0706	U	Preprotein translocase subunit YidC
111	CaPaus	YP_001799250	NC_010544	540	683996	685411	1416	-1	yidC	Preprotein translocase subunit YidC	K03217	COG0706	U	Preprotein translocase subunit YidC
111	CaPmal	YP_002004411	NC_011047	369	448309	450027	1719	1	yidC	preprotein translocase subunit YidC	K03217	COG0706	U	Preprotein translocase subunit YidC
111	PNWB_v1	c2110	Contig1H	21	33120	34712	1593	-1	yidC	preprotein translocase subunit YidC	K03217	COG0706	U	Preprotein translocase subunit YidC
112	CaPastA	YP_456669	NC_007716	473	499940	500326	387	-1	rnpA	ribonuclease P	K03536	COG0594	J	RNase P protein component
112	CaPastO	NP_950500	NC_005303	248	276812	277237	426	1	rnpA	ribonuclease P	K03536	COG0594	J	RNase P protein component
112	CaPaus	YP_001799251	NC_010544	541	685438	685785	348	-1	rnpA	Ribonuclease P protein component	K03536	COG0594	J	RNase P protein component
112	CaPmal	YP_002004410	NC_011047	368	447947	448285	339	1	rnpA	ribonuclease P	K03536	COG0594	J	RNase P protein component
112	PNWB_v1	c2120	Contig1H	22	34739	35086	348	-1	rnpA	ribonuclease P	K03536	COG0594	J	RNase P protein component
113	CaPastA	YP_456670	NC_007716	474	500470	500604	135	-1	rpmH	50S ribosomal protein L34	K02914	COG0230	J	Ribosomal protein L34
113	CaPastO	NP_950499	NC_005303	247	276574	276708	135	1	rpmH	ribosomal protein L34	K02914	COG0230	J	Ribosomal protein L34
113	CaPaus	YP_001799252	NC_010544	542	685933	686067	135	-1	rpmH	50S ribosomal protein L34	K02914	COG0230	J	Ribosomal protein L34
113	CaPmal	YP_002004409	NC_011047	367	447703	447837	135	1	rpmH	50S ribosomal protein L34	K02914	COG0230	J	Ribosomal protein L34
113	PNWB_v1	c2130	Contig1H	23	35158	35292	135	-1	rpmH	50S ribosomal protein L34	K02914	COG0230	J	Ribosomal protein L34
114	CaPastA	YP_456856	NC_007716	660	690487	691170	684	-1	rplT	50S ribosomal protein L20/unknown domain fusion protein	K02887	COG0292	J	Ribosomal protein L20
114	CaPastO	NP_950994	NC_005303	737	837750	838373	624	-1	rplT	ribosomal protein L20	K02887	COG0292	J	Ribosomal protein L20
114	CaPaus	YP_001798780	NC_010544	70	107231	108115	885	1	rplT	50S ribosomal protein L20/unknown domain fusion protein	K02887	COG0292	J	Ribosomal protein L20
114	CaPmal	YP_002004471	NC_011047	429	528415	529095	681	1	rplT	50S ribosomal protein L20	K02887	COG0292	J	Ribosomal protein L20
114	PNWB_v1	c2160	Contig1H	26	37139	37849	711	-1	rplT	50S ribosomal protein L20/unknown domain fusion protein	K02887	COG0292	J	Ribosomal protein L20
115	CaPastA	YP_456857	NC_007716	661	691185	691391	207	-1	rpmI	50S ribosomal protein L35	K02916	COG0291	J	Ribosomal protein L35
115	CaPastO	NP_950995	NC_005303	738	838388	838594	207	-1	rpmI	ribosomal protein L35	K02916	COG0291	J	Ribosomal protein L35
115	CaPaus	YP_001798779	NC_010544	69	107019	107216	198	1	rpmI	50S ribosomal protein L35	K02916	COG0291	J	Ribosomal protein L35
115	CaPmal	YP_002004470	NC_011047	428	528203	528400	198	1	rpmI	50S ribosomal protein L35	K02916	COG0291	J	Ribosomal protein L35
115	PNWB_v1	c2170	Contig1H	27	37885	38076	192	-1	rpmI	50S ribosomal protein L35	K02916	COG0291	J	Ribosomal protein L35
116	CaPastA	YP_456858	NC_007716	662	691506	691853	348	-1	infC	protein translation initiation factor 3	K02520	COG0290	J	Translation initiation factor 3 (IF-3)
116	CaPastO	NP_950996	NC_005303	739	838727	839179	453	-1	infC	translation initiation factor IF3	K02520	COG0290	J	Translation initiation factor 3 (IF-3)
116	CaPaus	YP_001798778	NC_010544	68	106478	106912	435	1	infC	Translation initiation factor IF3	K02520	COG0290	J	Translation initiation factor 3 (IF-3)
116	CaPmal	YP_002004469	NC_011047	427	527628	528185	558	1	infC	translation initiation factor IF-3	K02520	COG0290	J	Translation initiation factor 3 (IF-3)
116	PNWB_v1	c2180	Contig1H	28	38153	38506	354	-1	infC	translation initiation factor IF-3	K02520	COG0290	J	Translation initiation factor 3 (IF-3)
117	CaPastA	YP_456652	NC_007716	456	470965	472149	1185	-1	tufB	elongation factor Tu	K02358	COG0050	J	GTPases - translation elongation factors
117	CaPastO	NP_950517	NC_005303	264	305131	306315	1185	1	tufB	translation elongation factor EF-Tu	K02358	COG0050	J	GTPases - translation elongation factors
117	CaPaus	YP_001799235	NC_010544	525	656879	658063	1185	-1	tufB	elongation factor Tu	K02358	COG0050	J	GTPases - translation elongation factors
117	CaPmal	YP_002004426	NC_011047	384	474914	476092	1179	1	tuf	elongation factor Tu	K02358	COG0050	J	GTPases - translation elongation factors
117	PNWB_v1	c2190	Contig1H	29	39218	40420	1203	-1	tufB	elongation factor Tu	K02358	COG0050	J	GTPases - translation elongation factors
118	CaPastA	YP_456653	NC_007716	457	472284	474383	2100	-1	fusA	elongation factor G	K02355	COG0480	J	Translation elongation factors (GTPases)
118	CaPastO	NP_950516	NC_005303	263	302934	305000	2067	1	fusA	translation elongation factor EF-G	K02355	COG0480	J	Translation elongation factors (GTPases)
118	CaPaus	YP_001799236	NC_010544	526	658182	660248	2067	-1	fusA	elongation factor G	K02355	COG0480	J	Translation elongation factors (GTPases)
118	CaPmal	YP_002004425	NC_011047	383	472782	474848	2067	1	fusA	elongation factor G	K02355	COG0480	J	Translation elongation factors (GTPases)
118	PNWB_v1	c2200	Contig1H	30	40514	42580	2067	-1	fusA	elongation factor G	K02355	COG0480	J	Translation elongation factors (GTPases)
119	CaPastA	YP_456654	NC_007716	458	474377	474847	471	-1	rpsG	30S ribosomal protein S7	K02992	COG0049	J	Ribosomal protein S7
119	CaPastO	NP_950515	NC_005303	262	302439	302909	471	1	rpsG	ribosomal protein S7	K02992	COG0049	J	Ribosomal protein S7
119	CaPaus	YP_001799237	NC_010544	527	660277	660747	471	-1	rpsG	30S ribosomal protein S7	K02992	COG0049	J	Ribosomal protein S7
119	CaPmal	YP_002004424	NC_011047	382	472276	472746	471	1	rpsG	30S ribosomal protein S7	K02992	COG0049	J	Ribosomal protein S7
119	PNWB_v1	c2210	Contig1H	31	42620	43090	471	-1	rpsG	30S ribosomal protein S7	K02992	COG0049	J	Ribosomal protein S7
120	CaPastA	YP_456655	NC_007716	459	474918	475337	420	-1	rpsL	30S ribosomal protein S12	K02950	COG0048	J	Ribosomal protein S12
120	CaPastO	NP_950514	NC_005303	261	301931	302350	420	1	rpsL	ribosomal protein S12	K02950	COG0048	J	Ribosomal protein S12
120	CaPaus	YP_001799238	NC_010544	528	660815	661234	420	-1	rpsL	30S ribosomal protein S12	K02950	COG0048	J	Ribosomal protein S12
120	CaPmal	YP_002004423	NC_011047	381	471811	472224	414	1	rpsL	30S ribosomal protein S12	K02950	COG0048	J	Ribosomal protein S12
120	PNWB_v1	c2220	Contig1H	32	43131	43535	405	-1	rpsL	30S ribosomal protein S12	K02950	COG0048	J	Ribosomal protein S12
121	CaPastA	YP_456656	NC_007716	460	475358	479419	4062	-1	rpoC	DNA-directed RNA polymerase beta' chain	K03046	COG0086	K	DNA-directed RNA polymerase, beta' subunit/160 kD subunit
121	CaPastO	NP_950513	NC_005303	260	297849	301910	4062	1	rpoC	DNA-directed RNA polymerase beta' subunit	K03046	COG0086	K	DNA-directed RNA polymerase, beta' subunit/160 kD subunit
121	CaPaus	YP_001799239	NC_010544	529	661262	665326	4065	-1	rpoC	DNA-directed RNA polymerase beta chain	K03046	COG0086	K	DNA-directed RNA polymerase, beta' subunit/160 kD subunit
121	CaPmal	YP_002004422	NC_011047	380	467559	471617	4059	1	rpoC	DNA-directed RNA polymerase subunit beta'	K03046	COG0086	K	DNA-directed RNA polymerase, beta' subunit/160 kD subunit
121	PNWB_v1	c2230	Contig1H	33	43734	47873	4140	-1	rpoC	DNA-directed RNA polymerase subunit beta'	K03046	COG0086	K	DNA-directed RNA polymerase, beta' subunit/160 kD subunit
122	CaPastA	YP_456657	NC_007716	461	479423	483244	3822	-1	rpoB	DNA-directed RNA polymerase subunit beta	K03043	COG0085	K	DNA-directed RNA polymerase, beta subunit/140 kD subunit
122	CaPastO	NP_950512	NC_005303	259	294025	297846	3822	1	rpoB	DNA-directed RNA polymerase beta subunit	K03043	COG0085	K	DNA-directed RNA polymerase, beta subunit/140 kD subunit
122	CaPaus	YP_001799240	NC_010544	530	665330	669052	3723	-1	rpoB	DNA-directed RNA polymerase subunit beta	K03043	COG0085	K	DNA-directed RNA polymerase, beta subunit/140 kD subunit
122	CaPmal	YP_002004421	NC_011047	379	463738	467559	3822	1	rpoB	DNA-directed RNA polymerase subunit beta	K03043	COG0085	K	DNA-directed RNA polymerase, beta subunit/140 kD subunit
122	PNWB_v1	c2240	Contig1H	34	47882	51616	3735	-1	rpoB	DNA-directed RNA polymerase subunit beta	K03043	COG0085	K	DNA-directed RNA polymerase, beta subunit/140 kD subunit
123	CaPastA	YP_456659	NC_007716	463	483832	484365	534	-1	rplJ	50S ribosomal protein L10	K02864	COG0244	J	Ribosomal protein L10
123	CaPastO	NP_950510	NC_005303	257	292922	293431	510	1	rplJ	ribosomal protein L10	K02864	COG0244	J	Ribosomal protein L10
123	CaPaus	YP_001799242	NC_010544	532	669629	670129	501	-1	rplJ	50S ribosomal protein L10	K02864	COG0244	J	Ribosomal protein L10
123	CaPmal	YP_002004419	NC_011047	377	462659	463147	489	1	rplJ	50S ribosomal protein L10	K02864	COG0244	J	Ribosomal protein L10
123	PNWB_v1	c2260	Contig1H	36	52330	52839	510	-1	rplJ	50S ribosomal protein L10	K02864	COG0244	J	Ribosomal protein L10
124	CaPastA	YP_456660	NC_007716	464	484380	485072	693	-1	rplA	50S ribosomal protein L1	K02863	COG0081	J	Ribosomal protein L1
124	CaPastO	NP_950509	NC_005303	256	292157	292882	726	1	rplA	ribosomal protein L1	K02863	COG0081	J	Ribosomal protein L1
124	CaPaus	YP_001799243	NC_010544	533	670187	670876	690	-1	rplA	50S ribosomal protein L1	K02863	COG0081	J	Ribosomal protein L1
124	CaPmal	YP_002004418	NC_011047	376	461802	462497	696	1	rplA	50S ribosomal protein L1	K02863	COG0081	J	Ribosomal protein L1
124	PNWB_v1	c2270	Contig1H	37	52957	53646	690	-1	rplA	50S ribosomal protein L1	K02863	COG0081	J	Ribosomal protein L1
125	CaPastA	YP_456661	NC_007716	465	485161	485586	426	-1	rplK	50S ribosomal protein L11	K02867	COG0080	J	Ribosomal protein L11
125	CaPastO	NP_950508	NC_005303	255	291671	292096	426	1	rplK	ribosomal protein L11	K02867	COG0080	J	Ribosomal protein L11
125	CaPaus	YP_001799244	NC_010544	534	670893	671318	426	-1	rplK	50S ribosomal protein L11	K02867	COG0080	J	Ribosomal protein L11
125	CaPmal	YP_002004417	NC_011047	375	461320	461745	426	1	rplK	50S ribosomal protein L11	K02867	COG0080	J	Ribosomal protein L11
125	PNWB_v1	c2280	Contig1H	38	53713	54138	426	-1	rplK	50S ribosomal protein L11	K02867	COG0080	J	Ribosomal protein L11
126	CaPastA	YP_456662	NC_007716	466	485785	486384	600	-1	nusG	transcription antitermination protein nusG	K02601	COG0250	K	Transcription antiterminator
126	CaPastO	NP_950507	NC_005303	254	290859	291473	615	1	nusG	transcription antiterminator	K02601	COG0250	K	Transcription antiterminator
126	CaPaus	YP_001799245	NC_010544	535	671431	672045	615	-1	nusG	Transcription antitermination protein	K02601	COG0250	K	Transcription antiterminator
126	CaPmal	YP_002004416	NC_011047	374	460656	461243	588	1	nusG	transcription antitermination protein NusG	K02601	COG0250	K	Transcription antiterminator
126	PNWB_v1	c2290	Contig1H	39	54358	54969	612	-1	nusG	transcription antitermination protein	K02601	COG0250	K	Transcription antiterminator
127	CaPastA	YP_456775	NC_007716	579	601919	603235	1317	-1	cysS	cysteinyl-tRNA synthetase	K01883	COG0215	J	Cysteinyl-tRNA synthetase
127	CaPastO	NP_950393	NC_005303	141	165715	167031	1317	1	cysS	cysteinyl-tRNA synthetase	K01883	COG0215	J	Cysteinyl-tRNA synthetase
127	CaPaus	YP_001799085	NC_010544	375	494835	496154	1320	1	cysS	Cysteinyl-tRNA synthetase	K01883	COG0215	J	Cysteinyl-tRNA synthetase
127	CaPmal	YP_002004368	NC_011047	326	415192	416508	1317	1	cysS	cysteinyl-tRNA synthetase	K01883	COG0215	J	Cysteinyl-tRNA synthetase
127	PNWB_v1	c2330	Contig1H	43	58987	60309	1323	-1	cysS	cysteinyl-tRNA synthetase	K01883	COG0215	J	Cysteinyl-tRNA synthetase
128	CaPastA	YP_456776	NC_007716	580	603337	604686	1350	-1	gltX	glutamyl-tRNA synthetase	K01885	COG0008	J	Glutamyl- and glutaminyl-tRNA synthetases
128	CaPastO	NP_950392	NC_005303	140	164200	165549	1350	1	glnS	glutamyl- and glutaminyl-tRNA synthetase	K01885	COG0008	J	Glutamyl- and glutaminyl-tRNA synthetases
128	CaPaus	YP_001799084	NC_010544	374	493337	494683	1347	1	gltX	glutamyl-tRNA synthetase	K01885	COG0008	J	Glutamyl- and glutaminyl-tRNA synthetases
128	CaPmal	YP_002004367	NC_011047	325	413794	415128	1335	1	gltX	glutamyl-tRNA synthetase	K01885	COG0008	J	Glutamyl- and glutaminyl-tRNA synthetases
128	PNWB_v1	c2340	Contig1H	44	60413	61750	1338	-1	gltX	glutamyl-tRNA synthetase	K01885	COG0008	J	Glutamyl- and glutaminyl-tRNA synthetases
129	CaPastA	YP_456777	NC_007716	581	604788	605180	393	-1	rpsI	30S ribosomal protein S9	K02996	COG0103	J	Ribosomal protein S9
129	CaPastO	NP_950391	NC_005303	139	163708	164100	393	1	rpsI	ribosomal protein S9	K02996	COG0103	J	Ribosomal protein S9
129	CaPaus	YP_001799083	NC_010544	373	492872	493264	393	1	rpsI	30S ribosomal protein S9	K02996	COG0103	J	Ribosomal protein S9
129	CaPmal	YP_002004366	NC_011047	324	413330	413719	390	1	rpsI	30S ribosomal protein S9	K02996	COG0103	J	Ribosomal protein S9
129	PNWB_v1	c2350	Contig1H	45	61842	62234	393	-1	rpsI	30S ribosomal protein S9	K02996	COG0103	J	Ribosomal protein S9
130	CaPastA	YP_456778	NC_007716	582	605185	605643	459	-1	rplM	50S ribosomal protein L13	K02871	COG0102	J	Ribosomal protein L13
130	CaPastO	NP_950390	NC_005303	138	163245	163703	459	1	rplM	ribosomal protein L13	K02871	COG0102	J	Ribosomal protein L13
130	CaPaus	YP_001799082	NC_010544	372	492412	492867	456	1	rplM	50S ribosomal protein L13	K02871	COG0102	J	Ribosomal protein L13
130	CaPmal	YP_002004365	NC_011047	323	412882	413319	438	1	rplM	50S ribosomal protein L13	K02871	COG0102	J	Ribosomal protein L13
130	PNWB_v1	c2360	Contig1H	46	62242	62718	477	-1	rplM	50S ribosomal protein L13	K02871	COG0102	J	Ribosomal protein L13
131	CaPastA	YP_456511	NC_007716	315	333305	335194	1890	-1	glnP	ABC-type amino acid ABC transporter, permease component	K02029	COG0765	E	ABC-type amino acid transport system, permease component
131	CaPastO	NP_950708	NC_005303	452	507001	508794	1794	1	artM	ABC-type amino acid transport system, permease	K02029	COG0765	E	ABC-type amino acid transport system, permease component
131	CaPastO	NP_950709	NC_005303	453	508817	510646	1830	1	artI	ABC-type amino acid transport system, periplasmic component	K02029	COG0765	E	ABC-type amino acid transport system, permease component
131	CaPaus	YP_001799049	NC_010544	339	446683	448422	1740	-1	artM	Amino acid ABC transporter permease component	K02029	COG0765	E	ABC-type amino acid transport system, permease component
131	PNWB_v1	c2420	Contig1H	52	75271	76875	1605	1	artM	ABC-type amino acid transport system, permease component	K02029	COG0765	E	ABC-type amino acid transport system, permease component
132	CaPastA	YP_456250	NC_007716	54	62896	64539	1644	-1	srmB	superfamily II DNA/RNA helicase	NA	NA	X	NA
132	CaPastO	NP_950966	NC_005303	709	806944	808602	1659	1	srmB	superfamily II DNA and RNA helicase	NA	NA	X	NA
132	CaPaus	YP_001798833	NC_010544	123	184816	186510	1695	-1	NA	DEAD/DEAH box helicase-like	NA	NA	X	NA
132	CaPmal	YP_002004155	NC_011047	113	153328	154923	1596	-1	srmB	superfamily II DNA and RNA helicase	K05592	COG0513	JKL	Superfamily II DNA and RNA helicases
132	PNWB_v1	c2430	Contig1H	53	77075	78766	1692	-1	srmB1	superfamily II DNA/RNA helicase	K05592	COG0513	JKL	Superfamily II DNA and RNA helicases
133	CaPastA	YP_456505	NC_007716	309	322985	324277	1293	1	tyrS	tyrosyl-tRNA synthetase	K01866	COG0162	J	Tyrosyl-tRNA synthetase
133	CaPastO	NP_950721	NC_005303	465	525753	526994	1242	-1	tyrS	tyrosyl-tRNA synthetase	K01866	COG0162	J	Tyrosyl-tRNA synthetase
133	CaPaus	YP_001799131	NC_010544	421	553865	555112	1248	-1	tyrS	Tyrosyl-tRNA synthetase	K01866	COG0162	J	Tyrosyl-tRNA synthetase
133	CaPmal	YP_002004154	NC_011047	112	151767	153020	1254	-1	tyrS	tyrosyl-tRNA synthetase	K01866	COG0162	J	Tyrosyl-tRNA synthetase
133	PNWB_v1	c2510	Contig1H	61	86081	87340	1260	-1	tyrS	tyrosyl-tRNA synthetase	K01866	COG0162	J	Tyrosyl-tRNA synthetase
134	CaPastA	YP_456504	NC_007716	308	322678	323034	357	1	rplS	50S ribosomal protein L19	K02884	COG0335	J	Ribosomal protein L19
134	CaPastO	NP_950722	NC_005303	466	527179	527535	357	-1	rplS	ribosomal protein L19	K02884	COG0335	J	Ribosomal protein L19
134	CaPaus	YP_001799132	NC_010544	422	555181	555537	357	-1	rplS	50S ribosomal protein L19	K02884	COG0335	J	Ribosomal protein L19
134	CaPmal	YP_002004468	NC_011047	426	526865	527209	345	1	rplS	50S ribosomal protein L19	K02884	COG0335	J	Ribosomal protein L19
134	PNWB_v1	c2520	Contig1H	62	87454	87810	357	-1	rplS	50S ribosomal protein L19	K02884	COG0335	J	Ribosomal protein L19
135	CaPastA	YP_456503	NC_007716	307	321907	322635	729	1	trmD	tRNA (guanine-N(1)-)-methyltransferase	K00554	COG0336	J	tRNA-(guanine-N1)-methyltransferase
135	CaPastO	NP_950723	NC_005303	467	527577	528305	729	-1	trmD	tRNA-(guanine-N1)-methyltransferase	K00554	COG0336	J	tRNA-(guanine-N1)-methyltransferase
135	CaPaus	YP_001799133	NC_010544	423	555570	556304	735	-1	trmD	tRNA (guanine-N(1)-)-methyltransferase	K00554	COG0336	J	tRNA-(guanine-N1)-methyltransferase
135	CaPmal	YP_002004467	NC_011047	425	526132	526863	732	1	trmD	tRNA (guanine-N(1)-)-methyltransferase	K00554	COG0336	J	tRNA-(guanine-N1)-methyltransferase
135	PNWB_v1	c2530	Contig1H	63	87878	88615	738	-1	trmD	tRNA (guanine-N(1)-)-methyltransferase	K00554	COG0336	J	tRNA-(guanine-N1)-methyltransferase
136	CaPastA	YP_456502	NC_007716	306	321585	321848	264	1	rpsP	30S ribosomal protein S16	K02959	COG0228	J	Ribosomal protein S16
136	CaPastO	NP_950724	NC_005303	468	528365	528628	264	-1	rpsP	ribosomal protein S16	K02959	COG0228	J	Ribosomal protein S16
136	CaPaus	YP_001799134	NC_010544	424	556340	556615	276	-1	rpsP	30S ribosomal protein S16	K02959	COG0228	J	Ribosomal protein S16
136	CaPmal	YP_002004465	NC_011047	423	525345	525590	246	1	rpsP	30S ribosomal protein S16	K02959	COG0228	J	Ribosomal protein S16
136	PNWB_v1	c2540	Contig1H	64	88718	88963	246	-1	rpsP	30S ribosomal protein S16	K02959	COG0228	J	Ribosomal protein S16
137	CaPastA	YP_456300	NC_007716	104	123128	123595	468	1	hit	asymmetrical bis(5'-nucleosyl)-tetraphosphatase	K02503	COG0537	FGR	Diadenosine tetraphosphate (Ap4A) hydrolase and other HIT family hydrolases
137	CaPastO	NP_950882	NC_005303	626	714497	714958	462	-1	hit	diadenosine tetraphosphate hydrolase	K02503	COG0537	FGR	Diadenosine tetraphosphate (Ap4A) hydrolase and other HIT family hydrolases
137	CaPaus	YP_001799280	NC_010544	570	724109	724522	414	-1	hit	Diadenosine tetraphosphate hydrolase	K02503	COG0537	FGR	Diadenosine tetraphosphate (Ap4A) hydrolase and other HIT family hydrolases
137	CaPmal	YP_002004171	NC_011047	129	170553	170972	420	1	hit	diadenosine tetraphosphate hydrolase, cell-cycle regulation histidine triad	K02503	COG0537	FGR	Diadenosine tetraphosphate (Ap4A) hydrolase and other HIT family hydrolases
137	PNWB_v1	c2570	Contig1H	67	91248	91667	420	-1	hit	diadenosine tetraphosphate hydrolase	K02503	COG0537	FGR	Diadenosine tetraphosphate (Ap4A) hydrolase and other HIT family hydrolases
138	CaPastA	YP_456299	NC_007716	103	122118	123110	993	1	rnhC	ribonuclease HIII	K03471	COG1039	L	Ribonuclease HIII
138	CaPastO	NP_950883	NC_005303	627	714980	715972	993	-1	NA	ribonuclease HII Family 2	K03471	COG1039	L	Ribonuclease HIII
138	CaPaus	YP_001799282	NC_010544	572	725645	726550	906	-1	rnhC	Ribonuclease HII family protein	K03471	COG1039	L	Ribonuclease HIII
138	CaPmal	YP_002004170	NC_011047	128	169642	170508	867	1	rnhC	ribonuclease HIII	K03471	COG1039	L	Ribonuclease HIII
138	PNWB_v1	c2590	Contig1H	69	92733	93173	441	-1	rnhC	ribonuclease HIII	K03471	COG1039	L	Ribonuclease HIII
139	CaPastA	YP_456752	NC_007716	556	574992	575630	639	-1	ung	uracil-DNA glycosylase	K03648	COG0692	L	Uracil DNA glycosylase
139	CaPastO	NP_950415	NC_005303	163	194730	195371	642	1	ung	uracil DNA glycosylase	K03648	COG0692	L	Uracil DNA glycosylase
139	CaPaus	YP_001799107	NC_010544	397	513652	514296	645	-1	ung	uracil-DNA glycosylase	K03648	COG0692	L	Uracil DNA glycosylase
139	CaPmal	YP_002004264	NC_011047	222	303465	304106	642	1	ung	uracil-DNA glycosylase	K03648	COG0692	L	Uracil DNA glycosylase
139	PNWB_v1	c2600	Contig1H	70	93901	94575	675	-1	ung	uracil-DNA glycosylase	K03648	COG0692	L	Uracil DNA glycosylase
140	CaPastA	YP_456729	NC_007716	533	546645	549503	2859	-1	mgtA	cation transport ATPase	NA	NA	X	NA
140	CaPastO	NP_950438	NC_005303	186	221711	224467	2757	1	mgtA	cation transport ATPase	NA	NA	X	NA
140	CaPaus	YP_001798968	NC_010544	258	356060	358876	2817	-1	mgtA	Cation-transporting ATPase A, P type (ATPase, E1-E2 type)	NA	NA	X	NA
140	CaPmal	YP_002004255	NC_011047	213	290127	292874	2748	-1	NA	cation transport ATPase	K01537	COG0474	P	Cation transport ATPase
140	PNWB_v1	c2630	Contig1I	1	883	3639	2757	-1	mgtA1	cation transport ATPase	K01537	COG0474	P	Cation transport ATPase
141	CaPastA	YP_456762	NC_007716	566	587258	588529	1272	1	tlyC	hymolysin-related protein	K03699	COG1253	R	Hemolysins and related proteins containing CBS domains
141	CaPastO	NP_950405	NC_005303	153	179708	181000	1293	-1	NA	hemolysin	K03699	COG1253	R	Hemolysins and related proteins containing CBS domains
141	CaPaus	YP_001799196	NC_010544	486	605967	607280	1314	-1	NA	Putative transporter	K03699	COG1253	R	Hemolysins and related proteins containing CBS domains
141	CaPmal	YP_002004309	NC_011047	267	353470	354756	1287	1	NA	hemolysin	K03699	COG1253	R	Hemolysins and related proteins containing CBS domains
141	PNWB_v1	c2640	Contig1I	2	3749	5017	1269	-1	tlyC	hymolysin-related protein	K03699	COG1253	R	Hemolysins and related proteins containing CBS domains
142	CaPastA	YP_456671	NC_007716	475	500772	502196	1425	-1	proS	prolyl-tRNA synthetase	K01881	COG0442	J	Prolyl-tRNA synthetase
142	CaPastO	NP_950498	NC_005303	246	274923	276347	1425	1	proS	prolyl-tRNA synthetase	K01881	COG0442	J	Prolyl-tRNA synthetase
142	CaPaus	YP_001799253	NC_010544	543	686172	687596	1425	-1	proS	prolyl-tRNA synthetase	K01881	COG0442	J	Prolyl-tRNA synthetase
142	CaPmal	YP_002004463	NC_011047	421	521319	522740	1422	1	proS	prolyl-tRNA synthetase	K01881	COG0442	J	Prolyl-tRNA synthetase
142	PNWB_v1	c2660	Contig1I	3	5244	6665	1422	-1	proS	prolyl-tRNA synthetase	K01881	COG0442	J	Prolyl-tRNA synthetase
143	CaPastA	YP_456782	NC_007716	586	607134	607595	462	-1	NA	hypothetical protein	NA	NA	X	NA
143	CaPastO	NP_950387	NC_005303	135	161563	161895	333	1	NA	hypothetical protein	NA	NA	X	NA
143	CaPaus	YP_001799079	NC_010544	369	491014	491337	324	1	NA	hypothetical protein	NA	NA	X	NA
143	CaPmal	YP_002004301	NC_011047	259	342586	342909	324	1	NA	hypothetical protein	NA	NA	X	NA
143	PNWB_v1	c2710	Contig1I	6	11549	11872	324	-1	NA	hypothetical protein	NA	NA	X	NA
144	CaPastA	YP_456676	NC_007716	480	506166	507182	1017	-1	gpsA	glycerol-3-phosphate dehydrogenase [NAD(P)+]	K00057	COG0240	C	Glycerol-3-phosphate dehydrogenase
144	CaPastO	NP_950493	NC_005303	241	269418	270569	1152	1	gpsA	glycerol 3-phosphate dehydrogenase	K00057	COG0240	C	Glycerol-3-phosphate dehydrogenase
144	CaPaus	YP_001799259	NC_010544	549	691296	692285	990	-1	gpsA	Glycerol-3-phosphate dehydrogenase	K00057	COG0240	C	Glycerol-3-phosphate dehydrogenase
144	CaPmal	YP_002004160	NC_011047	118	159760	160755	996	-1	gpsA	glycerol-3-phosphate dehydrogenase	K00057	COG0240	C	Glycerol-3-phosphate dehydrogenase
144	PNWB_v1	c2750	Contig1I	10	13346	14326	981	-1	gpsA	glycerol-3-phosphate dehydrogenase	K00057	COG0240	C	Glycerol-3-phosphate dehydrogenase
145	CaPastA	YP_456677	NC_007716	481	507360	508799	1440	-1	engA	GTP-binding protein EngA	K03977	COG1160	R	Predicted GTPases
145	CaPastO	NP_950492	NC_005303	240	267931	269367	1437	1	NA	hypothetical protein	K03977	COG1160	R	Predicted GTPases
145	CaPaus	YP_001799339	NC_010544	629	802181	803500	1320	-1	engA	GTP-binding protein EngA	K03977	COG1160	R	Predicted GTPases
145	CaPmal	YP_002004161	NC_011047	119	160752	162077	1326	-1	engA	GTP-binding protein EngA	K03977	COG1160	R	Predicted GTPases
145	PNWB_v1	c2760	Contig1I	11	14332	15642	1311	-1	engA	GTP-binding protein EngA	K03977	COG1160	R	Predicted GTPases
146	CaPastA	YP_456678	NC_007716	482	508800	509471	672	-1	cmk	cytidylate kinase	K00945	COG0283	F	Cytidylate kinase
146	CaPastO	NP_950491	NC_005303	239	267259	267930	672	1	cmk	cytidylate kinase	K00945	COG0283	F	Cytidylate kinase
146	CaPaus	YP_001799340	NC_010544	630	803488	804162	675	-1	cmk	Cytidylate kinase	K00945	COG0283	F	Cytidylate kinase
146	CaPmal	YP_002004162	NC_011047	120	162067	162765	699	-1	cmk	cytidylate kinase	K00945	COG0283	F	Cytidylate kinase
146	PNWB_v1	c2770	Contig1I	12	15630	16322	693	-1	cmk	cytidylate kinase	K00945	COG0283	F	Cytidylate kinase
147	CaPastA	YP_456641	NC_007716	445	459480	460049	570	-1	efp	elongation factor P	K02356	COG0231	J	Translation elongation factor P (EF-P)/translation initiation factor 5A (eIF-5A)
147	CaPastO	NP_950528	NC_005303	275	317585	318154	570	1	efp	translation elongation factor EF-P	K02356	COG0231	J	Translation elongation factor P (EF-P)/translation initiation factor 5A (eIF-5A)
147	CaPaus	YP_001799220	NC_010544	510	636186	636755	570	-1	efp	elongation factor P	K02356	COG0231	J	Translation elongation factor P (EF-P)/translation initiation factor 5A (eIF-5A)
147	CaPmal	YP_002004164	NC_011047	122	163569	164135	567	-1	efp	elongation factor P	K02356	COG0231	J	Translation elongation factor P (EF-P)/translation initiation factor 5A (eIF-5A)
147	PNWB_v1	c2780	Contig1I	13	16410	16988	579	-1	efp	elongation factor P	K02356	COG0231	J	Translation elongation factor P (EF-P)/translation initiation factor 5A (eIF-5A)
148	CaPastA	YP_456642	NC_007716	446	460102	460977	876	-1	miaA	tRNA delta(2)-isopentenylpyrophosphate transferase	K00791	COG0324	J	tRNA delta(2)-isopentenylpyrophosphate transferase
148	CaPastO	NP_950527	NC_005303	274	316651	317526	876	1	miaA	tRNA delta(2)-isopentenylpyrophosphate	K00791	COG0324	J	tRNA delta(2)-isopentenylpyrophosphate transferase
148	CaPaus	YP_001799221	NC_010544	511	636759	637631	873	-1	miaA	tRNA delta(2)-isopentenylpyrophosphate transferase	K00791	COG0324	J	tRNA delta(2)-isopentenylpyrophosphate transferase
148	CaPmal	YP_002004165	NC_011047	123	164128	165027	900	-1	miaA	tRNA delta(2)-isopentenylpyrophosphate transferase	K00791	COG0324	J	tRNA delta(2)-isopentenylpyrophosphate transferase
148	PNWB_v1	c2790	Contig1I	14	16981	17880	900	-1	miaA	tRNA delta(2)-isopentenylpyrophosphate transferase	K00791	COG0324	J	tRNA delta(2)-isopentenylpyrophosphate transferase
149	CaPastA	YP_456643	NC_007716	447	461146	461907	762	-1	NA	hypothetical protein	K09769	COG1692	S	Uncharacterized protein conserved in bacteria
149	CaPastO	NP_950525	NC_005303	272	315658	316119	462	1	NA	hypothetical protein	K09769	COG1692	S	Uncharacterized protein conserved in bacteria
149	CaPaus	YP_001799222	NC_010544	512	637756	638520	765	-1	NA	Putative metallophosphoesterase	K09769	COG1692	S	Uncharacterized protein conserved in bacteria
149	CaPmal	YP_002004166	NC_011047	124	165053	165817	765	-1	NA	hypothetical protein	K09769	COG1692	S	Uncharacterized protein conserved in bacteria
149	PNWB_v1	c2800	Contig1I	15	17873	18640	768	-1	NA	metallophosphoesterase	K09769	COG1692	S	Uncharacterized protein conserved in bacteria
150	CaPastA	YP_456644	NC_007716	448	461932	463518	1587	-1	NA	phosphodiesterase	K06950	COG1418	R	Predicted HD superfamily hydrolase
150	CaPastO	NP_950524	NC_005303	271	314047	315633	1587	1	NA	hypothetical protein	K06950	COG1418	R	Predicted HD superfamily hydrolase
150	CaPaus	YP_001799223	NC_010544	513	638539	640107	1569	-1	NA	phosphodiesterase	K06950	COG1418	R	Predicted HD superfamily hydrolase
150	CaPmal	YP_002004167	NC_011047	125	165874	167451	1578	-1	NA	hypothetical protein	K06950	COG1418	R	Predicted HD superfamily hydrolase
150	PNWB_v1	c2810	Contig1I	16	18665	20251	1587	-1	NA	phosphodiesterase	K06950	COG1418	R	Predicted HD superfamily hydrolase
151	CaPastA	YP_456224	NC_007716	28	38354	40078	1725	1	evbG	multidrug resistance ABC transporter ATP-binding and permease protein	K06148	COG4988;COG4987;COG1132;COG2274	COV	ABC-type transport system involved in cytochrome bd biosynthesis, ATPase and permease components;ABC-type transport system involved in cytochrome bd biosynthesis, fused ATPase and permease components;ABC-type multidrug transport system, ATPase and permease components;ABC-type bacteriocin/lantibiotic exporters, contain an N-terminal double-glycine peptidase domain
151	CaPastO	NP_950311	NC_005303	59	76501	78225	1725	1	mdlB	ABC-type multidrug/protein/lipid transport system, ATPase component	K06148	COG4988;COG4987;COG1132;COG2274	COV	ABC-type transport system involved in cytochrome bd biosynthesis, ATPase and permease components;ABC-type transport system involved in cytochrome bd biosynthesis, fused ATPase and permease components;ABC-type multidrug transport system, ATPase and permease components;ABC-type bacteriocin/lantibiotic exporters, contain an N-terminal double-glycine peptidase domain
151	CaPaus	YP_001798792	NC_010544	82	124266	125993	1728	1	mdlB	ABC-type multidrug/protein/lipid transport system, ATPase component	K06148	COG4988;COG4987;COG1132;COG2274	COV	ABC-type transport system involved in cytochrome bd biosynthesis, ATPase and permease components;ABC-type transport system involved in cytochrome bd biosynthesis, fused ATPase and permease components;ABC-type multidrug transport system, ATPase and permease components;ABC-type bacteriocin/lantibiotic exporters, contain an N-terminal double-glycine peptidase domain
151	CaPmal	YP_002004151	NC_011047	109	148125	149849	1725	-1	evbG	multidrug resistance ABC transporter, ATP-binding and permease protein	K06148	COG4988;COG4987;COG1132;COG2274	COV	ABC-type transport system involved in cytochrome bd biosynthesis, ATPase and permease components;ABC-type transport system involved in cytochrome bd biosynthesis, fused ATPase and permease components;ABC-type multidrug transport system, ATPase and permease components;ABC-type bacteriocin/lantibiotic exporters, contain an N-terminal double-glycine peptidase domain
151	PNWB_v1	c2860	Contig1I	21	26551	28284	1734	-1	evbG	multidrug resistance ABC transporter ATP-binding and permease protein	K06148	COG4988;COG4987;COG1132;COG2274	COV	ABC-type transport system involved in cytochrome bd biosynthesis, ATPase and permease components;ABC-type transport system involved in cytochrome bd biosynthesis, fused ATPase and permease components;ABC-type multidrug transport system, ATPase and permease components;ABC-type bacteriocin/lantibiotic exporters, contain an N-terminal double-glycine peptidase domain
152	CaPastA	YP_456796	NC_007716	600	624603	626213	1611	-1	groEL	chaperonin GroEL	K04077	COG0459	O	Chaperonin GroEL (HSP60 family)
152	CaPastO	NP_950373	NC_005303	121	142480	144090	1611	1	groEL	chaperonin GroEL	K04077	COG0459	O	Chaperonin GroEL (HSP60 family)
152	CaPaus	YP_001799322	NC_010544	612	775042	776652	1611	1	groEL	chaperonin GroEL	K04077	COG0459	O	Chaperonin GroEL (HSP60 family)
152	CaPmal	YP_002004222	NC_011047	180	237119	238729	1611	1	groEL	chaperonin GroEL	K04077	COG0459	O	Chaperonin GroEL (HSP60 family)
152	PNWB_v1	c2870	Contig1I	22	28499	30136	1638	-1	groEL	molecular chaperone GroEL	K04077	COG0459	O	Chaperonin GroEL (HSP60 family)
153	CaPastA	YP_456797	NC_007716	601	626339	626608	270	-1	groES	10 kDa chaperonin GroES	K04078	COG0234	O	Co-chaperonin GroES (HSP10)
153	CaPastO	NP_950372	NC_005303	120	142019	142288	270	1	groES	chaperonin GroES	K04078	COG0234	O	Co-chaperonin GroES (HSP10)
153	CaPaus	YP_001799321	NC_010544	611	774690	775016	327	1	groES	Chaperonin GroES (Hsp10)	K04078	COG0234	O	Co-chaperonin GroES (HSP10)
153	CaPmal	YP_002004221	NC_011047	179	236678	236941	264	1	groES	molecular chaperone GroES	K04078	COG0234	O	Co-chaperonin GroES (HSP10)
153	PNWB_v1	c2880	Contig1I	23	30677	30961	285	-1	groES	molecular chaperone GroES	K04078	COG0234	O	Co-chaperonin GroES (HSP10)
154	CaPastA	YP_456859	NC_007716	663	693661	695586	1926	-1	thrS	threonyl-tRNA synthetase	K01868	COG0441	J	Threonyl-tRNA synthetase
154	CaPastO	NP_950997	NC_005303	740	839910	840836	927	-1	thrS	threonyl-tRNA synthetase	K01868	COG0441	J	Threonyl-tRNA synthetase
154	CaPaus	YP_001798725	NC_010544	15	21039	22964	1926	-1	thrS	threonyl-tRNA synthetase	K01868	COG0441	J	Threonyl-tRNA synthetase
154	CaPmal	YP_002004205	NC_011047	163	211470	213392	1923	1	thrS	threonyl-tRNA synthetase	K01868	COG0441	J	Threonyl-tRNA synthetase
154	PNWB_v1	c2890	Contig1I	24	31767	33713	1947	-1	thrS	threonyl-tRNA synthetase	K01868	COG0441	J	Threonyl-tRNA synthetase
155	CaPastA	YP_456862	NC_007716	666	698374	699324	951	-1	NA	exopolyphosphatase-related protein	K06881	COG0618	R	Exopolyphosphatase-related proteins
155	CaPastO	NP_951000	NC_005303	743	844478	845446	969	-1	NA	exopolyphosphatase-related protein	K06881	COG0618	R	Exopolyphosphatase-related proteins
155	CaPaus	YP_001798728	NC_010544	18	25686	26666	981	-1	NA	Phosphoesterase family protein	K06881	COG0618	R	Exopolyphosphatase-related proteins
155	CaPmal	YP_002004203	NC_011047	161	209051	209992	942	1	NA	exopolyphosphatase-like protein	K06881	COG0618	R	Exopolyphosphatase-related proteins
155	PNWB_v1	c2920	Contig1I	25	37148	38167	1020	-1	NA	exopolyphosphatase-related protein	K06881	COG0618	R	Exopolyphosphatase-related proteins
156	CaPastA	YP_456863	NC_007716	667	699359	700999	1641	-1	malE	putative maltose/maltodextrin-binding protein MalE	K02027	COG1653;COG2182	G	ABC-type sugar transport system, periplasmic component;Maltose-binding periplasmic proteins/domains
156	CaPastO	NP_951001	NC_005303	744	845481	847103	1623	-1	ugpB	sugar-binding periplasmic protein	K02027	COG1653;COG2182	G	ABC-type sugar transport system, periplasmic component;Maltose-binding periplasmic proteins/domains
156	CaPaus	YP_001798729	NC_010544	19	26694	28268	1575	-1	ugpB	Sugar transport system substrate-binding protein, periplasmic component	K02027	COG1653;COG2182	G	ABC-type sugar transport system, periplasmic component;Maltose-binding periplasmic proteins/domains
156	CaPmal	YP_002004202	NC_011047	160	206759	208330	1572	1	malE	ABC-type maltose/maltodextrin-binding protein	K02027	COG1653;COG2182	G	ABC-type sugar transport system, periplasmic component;Maltose-binding periplasmic proteins/domains
156	PNWB_v1	c2930	Contig1I	26	38212	39948	1737	-1	malE	ABC-type sugar transport system, maltose-binding protein	K02027	COG1653;COG2182	G	ABC-type sugar transport system, periplasmic component;Maltose-binding periplasmic proteins/domains
157	CaPastA	YP_456864	NC_007716	668	700983	701864	882	-1	malG	ABC-type maltose transport system, permease protein MalG	K02026	COG0395;COG3833	G	ABC-type sugar transport system, permease component;ABC-type maltose transport systems, permease component
157	CaPastO	NP_951002	NC_005303	745	847087	847881	795	-1	ugpE	sugar permease	K02026	COG0395;COG3833	G	ABC-type sugar transport system, permease component;ABC-type maltose transport systems, permease component
157	CaPaus	YP_001798730	NC_010544	20	28252	29136	885	-1	ugpE	Sugar transport system, permease protein	K02026	COG0395;COG3833	G	ABC-type sugar transport system, permease component;ABC-type maltose transport systems, permease component
157	CaPmal	YP_002004201	NC_011047	159	205747	206676	930	1	malG	ABC-type maltose transport system, permease protein	K02026	COG0395;COG3833	G	ABC-type sugar transport system, permease component;ABC-type maltose transport systems, permease component
157	PNWB_v1	c2940	Contig1I	27	39932	40849	918	-1	malG	ABC-type sugar transport system, permease protein	K02026	COG0395;COG3833	G	ABC-type sugar transport system, permease component;ABC-type maltose transport systems, permease component
158	CaPastA	YP_456865	NC_007716	669	701891	702832	942	-1	malF	maltose transport system permease protein MalF	K02025	COG1175	G	ABC-type sugar transport systems, permease components
158	CaPastO	NP_951003	NC_005303	746	848010	848951	942	-1	ugpA	ABC-type sugar transport system, permease	K02025	COG1175	G	ABC-type sugar transport systems, permease components
158	CaPaus	YP_001798731	NC_010544	21	29157	30071	915	-1	ugpA	Sugar transport system, permease protein	K02025	COG1175	G	ABC-type sugar transport systems, permease components
158	CaPmal	YP_002004200	NC_011047	158	204808	205728	921	1	malF	ABC-type maltose transport system permease protein	K02025	COG1175	G	ABC-type sugar transport systems, permease components
158	PNWB_v1	c2950	Contig1I	28	40860	41819	960	-1	malF	ABC-type sugar transport system, permease protein	K02025	COG1175	G	ABC-type sugar transport systems, permease components
159	CaPastA	YP_456866	NC_007716	670	702833	703948	1116	-1	malK	ABC-type maltose/maltodextrin transport system, ATP-binding protein MalK	K02023	COG3839	G	ABC-type sugar transport systems, ATPase components
159	CaPastO	NP_951004	NC_005303	747	849015	850058	1044	-1	malK	ABC-type sugar transport system, ATPase	K02023	COG3839	G	ABC-type sugar transport systems, ATPase components
159	CaPaus	YP_001798732	NC_010544	22	30072	31178	1107	-1	malK	ABC-type sugar transport system, ATPase component	K02023	COG3839	G	ABC-type sugar transport systems, ATPase components
159	CaPmal	YP_002004199	NC_011047	157	203714	204805	1092	1	malK	ABC-type maltose/maltodextrin transport system, ATP-binding protein	K02023	COG3839	G	ABC-type sugar transport systems, ATPase components
159	PNWB_v1	c2960	Contig1I	29	41820	42917	1098	-1	malK	ABC-type sugar transport system, ATP-binding protein	K02023	COG3839	G	ABC-type sugar transport systems, ATPase components
160	CaPastA	YP_456867	NC_007716	671	704185	705696	1512	-1	asnC	asparaginyl-tRNA synthetase	K01893	COG0017	J	Aspartyl/asparaginyl-tRNA synthetases
160	CaPastO	NP_951006	NC_005303	749	850542	852062	1521	-1	asnS	aspartyl/asparaginyl-tRNA synthetase	K01893	COG0017	J	Aspartyl/asparaginyl-tRNA synthetases
160	CaPaus	YP_001798733	NC_010544	23	32270	33643	1374	-1	asnC	asparaginyl-tRNA synthetase	K01893	COG0017	J	Aspartyl/asparaginyl-tRNA synthetases
160	CaPmal	YP_002004198	NC_011047	156	202237	203634	1398	1	asnC	asparaginyl-tRNA synthetase	K01893	COG0017	J	Aspartyl/asparaginyl-tRNA synthetases
160	PNWB_v1	c2970	Contig1I	30	42977	44224	1248	-1	asnC	asparaginyl-tRNA synthetase	K01893	COG0017	J	Aspartyl/asparaginyl-tRNA synthetases
161	CaPastA	YP_456338	NC_007716	142	170186	171274	1089	1	plsX	putative glycerol-3-phosphate acyltransferase PlsX	K03621	COG0416	I	Fatty acid/phospholipid biosynthesis enzyme
161	CaPastO	NP_950859	NC_005303	603	685905	687005	1101	1	plsX	fatty acid/phospholipid biosynthesis enzyme	K03621	COG0416	I	Fatty acid/phospholipid biosynthesis enzyme
161	CaPaus	YP_001799215	NC_010544	505	626875	627927	1053	-1	plsX	putative glycerol-3-phosphate acyltransferase PlsX	K03621	COG0416	I	Fatty acid/phospholipid biosynthesis enzyme
161	CaPmal	YP_002004095	NC_011047	53	65437	66489	1053	-1	plsX	glycerol-3-phosphate acyltransferase PlsX	K03621	COG0416	I	Fatty acid/phospholipid biosynthesis enzyme
161	PNWB_v1	c2980	Contig1I	31	46192	47214	1023	1	plsX	glycerol-3-phosphate acyltransferase PlsX	K03621	COG0416	I	Fatty acid/phospholipid biosynthesis enzyme
162	CaPastA	YP_456339	NC_007716	143	171280	171993	714	1	rnc	dsRNA-specific ribonuclease	K03685	COG0571	K	dsRNA-specific ribonuclease
162	CaPastO	NP_950860	NC_005303	604	687002	687718	717	1	rnc	dsRNA-specific ribonuclease	K03685	COG0571	K	dsRNA-specific ribonuclease
162	CaPaus	YP_001799214	NC_010544	504	626210	626878	669	-1	rnc	DsRNA-specific ribonuclease	K03685	COG0571	K	dsRNA-specific ribonuclease
162	CaPmal	YP_002004094	NC_011047	52	64779	65456	678	-1	rnc	DsRNA-specific ribonuclease	K03685	COG0571	K	dsRNA-specific ribonuclease
162	PNWB_v1	c2990	Contig1I	32	47229	47909	681	1	rnc	ribonuclease III	K03685	COG0571	K	dsRNA-specific ribonuclease
163	CaPastA	YP_456340	NC_007716	144	172007	172627	621	1	NA	hypothetical protein	NA	NA	X	NA
163	CaPastO	NP_950861	NC_005303	605	687660	688343	684	1	NA	hypothetical protein	NA	NA	X	NA
163	CaPaus	YP_001799213	NC_010544	503	625468	626082	615	-1	dnaD	Putative DNA replication protein	NA	NA	X	NA
163	CaPmal	YP_002004093	NC_011047	51	64172	64786	615	-1	dnaD	DNA replication protein	NA	NA	X	NA
163	PNWB_v1	c3000	Contig1I	33	47909	48523	615	1	dnaD	DNA replication protein	K02086	COG3935	L	Putative primosome component and related proteins
164	CaPastA	YP_456318	NC_007716	122	143455	145065	1611	1	pyrG	CTP synthetase	K01937	COG0504	F	CTP synthase (UTP-ammonia lyase)
164	CaPastO	NP_950863	NC_005303	607	689018	690640	1623	-1	pyrG	CTP synthase	K01937	COG0504	F	CTP synthase (UTP-ammonia lyase)
164	CaPaus	YP_001799211	NC_010544	501	623179	624822	1644	1	pyrG	CTP synthetase	K01937	COG0504	F	CTP synthase (UTP-ammonia lyase)
164	CaPmal	YP_002004091	NC_011047	49	61804	63429	1626	1	pyrG	CTP synthetase	K01937	COG0504	F	CTP synthase (UTP-ammonia lyase)
164	PNWB_v1	c3020	Contig1I	35	49231	50859	1629	-1	pyrG	CTP synthetase	K01937	COG0504	F	CTP synthase (UTP-ammonia lyase)
165	CaPastA	YP_456317	NC_007716	121	142461	143462	1002	1	psd	phosphatidylserine decarboxylase	K01613	COG0688	I	Phosphatidylserine decarboxylase
165	CaPastO	NP_950864	NC_005303	608	690633	691631	999	-1	psd	phosphatidylserine decarboxylase	K01613	COG0688	I	Phosphatidylserine decarboxylase
165	CaPaus	YP_001799210	NC_010544	500	622233	623105	873	1	psd	Phosphatidylserine decarboxylase	K01613	COG0688	I	Phosphatidylserine decarboxylase
165	CaPmal	YP_002004090	NC_011047	48	60932	61807	876	1	psd	phosphatidylserine decarboxylase	K01613	COG0688	I	Phosphatidylserine decarboxylase
165	PNWB_v1	c3030	Contig1I	36	50923	51792	870	-1	psd	phosphatidylserine decarboxylase	K01613	COG0688	I	Phosphatidylserine decarboxylase
166	CaPastA	YP_456316	NC_007716	120	141714	142448	735	1	pssA	CDP-diacylglycerol-serine O-phosphatidyltransferase	K00998	COG1502	I	Phosphatidylserine/phosphatidylglycerophosphate/cardiolipin synthases and related enzymes
166	CaPastO	NP_950865	NC_005303	609	691644	692378	735	-1	pssA	phosphatidylserine synthase	K00998	COG1502	I	Phosphatidylserine/phosphatidylglycerophosphate/cardiolipin synthases and related enzymes
166	CaPaus	YP_001799209	NC_010544	499	621568	622233	666	1	pssA	Phosphatidylserine synthase	K00998	COG1502	I	Phosphatidylserine/phosphatidylglycerophosphate/cardiolipin synthases and related enzymes
166	CaPmal	YP_002004089	NC_011047	47	60176	60919	744	1	pssA	CDP-diacylglycerol--serine O-phosphatidyltransferase	K00998	COG1502	I	Phosphatidylserine/phosphatidylglycerophosphate/cardiolipin synthases and related enzymes
166	PNWB_v1	c3040	Contig1I	37	51789	52493	705	-1	pssA	CDP-diacylglycerol-serine O-phosphatidyltransferase	K00998	COG1502	I	Phosphatidylserine/phosphatidylglycerophosphate/cardiolipin synthases and related enzymes
167	CaPastA	YP_456314	NC_007716	118	140669	140953	285	1	NA	hypothetical protein	K09747	COG0718	S	Uncharacterized protein conserved in bacteria
167	CaPastO	NP_950867	NC_005303	611	693264	693473	210	-1	NA	hypothetical protein	NA	NA	X	NA
167	CaPaus	YP_001799207	NC_010544	497	620696	620980	285	1	NA	hypothetical protein	K09747	COG0718	S	Uncharacterized protein conserved in bacteria
167	CaPmal	YP_002004086	NC_011047	44	58793	59077	285	1	NA	hypothetical protein	NA	NA	X	NA
167	PNWB_v1	c3060	Contig1I	39	53074	53346	273	-1	NA	hypothetical protein	K09747	COG0718	S	Uncharacterized protein conserved in bacteria
168	CaPastA	YP_456313	NC_007716	117	138695	140656	1962	1	dnaX	DNA polymerase III, gamma/tau subunit	K02343	COG2812	L	DNA polymerase III, gamma/tau subunits
168	CaPastO	NP_950869	NC_005303	613	693977	695425	1449	-1	dnaX	DNA polymerase III, gamma/tau subunit	K02343	COG2812	L	DNA polymerase III, gamma/tau subunits
168	CaPaus	YP_001799206	NC_010544	496	618865	620673	1809	1	dnaX	DNA polymerase III, gamma/tau subunit	K02343	COG2812	L	DNA polymerase III, gamma/tau subunits
168	CaPmal	YP_002004085	NC_011047	43	57032	58774	1743	1	dnaX	DNA polymerase III	K02343	COG2812	L	DNA polymerase III, gamma/tau subunits
168	PNWB_v1	c3070	Contig1I	40	53449	55290	1842	-1	dnaX	DNA polymerase III subunits gamma and tau	K02343	COG2812	L	DNA polymerase III, gamma/tau subunits
169	CaPastA	YP_456593	NC_007716	397	406474	407079	606	1	nfnB	nitroreductase	K00540	NA	X	NA
169	CaPastO	NP_950687	NC_005303	430	476422	477027	606	-1	nfnB	nitroreductase	K00540	NA	X	NA
169	CaPaus	YP_001799086	NC_010544	376	496167	496784	618	1	nfnB	Putative nitroreductase	K00540	NA	X	NA
169	CaPmal	YP_002004319	NC_011047	277	364124	364720	597	-1	NA	nitroreductase	K00540	NA	X	NA
169	PNWB_v1	c3090	Contig1I	42	56997	57614	618	1	nfnB	nitroreductase	K00540	NA	X	NA
170	CaPastA	YP_456520	NC_007716	324	345845	347188	1344	1	hcaD	NADH oxidase H2O2-forming	K00359	COG0446	R	Uncharacterized NAD(FAD)-dependent dehydrogenases
170	CaPastO	NP_950693	NC_005303	436	482172	483515	1344	1	hcaD	NAD-dependent dehydrogenase	K00359	COG0446	R	Uncharacterized NAD(FAD)-dependent dehydrogenases
170	CaPaus	YP_001799391	NC_010544	681	875623	876963	1341	-1	nox	Putative NADH oxidase H2O2-forming	K00359	COG0446	R	Uncharacterized NAD(FAD)-dependent dehydrogenases
170	CaPmal	YP_002004321	NC_011047	279	365152	366489	1338	-1	hcaD	NAD-dependent dehydrogenase	K00359	COG0446	R	Uncharacterized NAD(FAD)-dependent dehydrogenases
170	PNWB_v1	c3110	Contig1I	44	59027	60376	1350	-1	hcaD	NADH oxidase H2O2-forming	K00359	COG0446	R	Uncharacterized NAD(FAD)-dependent dehydrogenases
171	CaPastA	YP_456649	NC_007716	453	467235	469139	1905	1	gidA	tRNA uridine 5-carboxymethylaminomethyl modification enzyme GidA	K03495	COG0445	D	NAD/FAD-utilizing enzyme apparently involved in cell division
171	CaPastO	NP_950520	NC_005303	267	308228	310081	1854	-1	gidA	glucose inhibited division protein A	K03495	COG0445	D	NAD/FAD-utilizing enzyme apparently involved in cell division
171	CaPaus	YP_001799227	NC_010544	517	643520	645364	1845	1	gidA	tRNA uridine 5-carboxymethylaminomethyl modification enzyme GidA	K03495	COG0445	D	NAD/FAD-utilizing enzyme apparently involved in cell division
171	CaPmal	YP_002004177	NC_011047	135	176813	178687	1875	-1	gidA	tRNA uridine 5-carboxymethylaminomethyl modification protein GidA	K03495	COG0445	D	NAD/FAD-utilizing enzyme apparently involved in cell division
171	PNWB_v1	c3190	Contig1I	51	73834	75690	1857	-1	gidA	tRNA uridine 5-carboxymethylaminomethyl modification enzyme GidA	K03495	COG0445	D	NAD/FAD-utilizing enzyme apparently involved in cell division
172	CaPastA	YP_456648	NC_007716	452	466524	467219	696	1	NA	hypothetical protein	NA	NA	X	NA
172	CaPastO	NP_950521	NC_005303	268	310138	310833	696	-1	NA	hypothetical protein	NA	NA	X	NA
172	CaPaus	YP_001799226	NC_010544	516	642832	643500	669	1	NA	hypothetical protein	NA	NA	X	NA
172	CaPmal	YP_002004178	NC_011047	136	178715	179347	633	-1	NA	hypothetical protein	NA	NA	X	NA
172	PNWB_v1	c3200	Contig1I	52	75760	76395	636	-1	NA	hypothetical protein	NA	NA	X	NA
173	CaPastA	YP_456802	NC_007716	606	629862	630347	486	1	codA	cytosine deaminase	NA	NA	X	NA
173	CaPastO	NP_950355	NC_005303	103	128672	129157	486	-1	NA	cytosine/adenosine deaminase	NA	NA	X	NA
173	CaPaus	YP_001799287	NC_010544	577	730960	731460	501	-1	codA	Cytidine/deoxycytidylate deaminase family protein	NA	NA	X	NA
173	CaPmal	YP_002004179	NC_011047	137	179512	179967	456	-1	NA	cytosine/adenosine deaminase	K11991	COG0590	FJ	Cytosine/adenosine deaminases
173	PNWB_v1	c3210	Contig1I	53	76632	77099	468	-1	NA	cytosine/adenosine deaminase	NA	NA	X	NA
174	CaPastA	YP_456801	NC_007716	605	629102	629803	702	1	tdk	thymidine kinase	K00857	COG1435	F	Thymidine kinase
174	CaPastO	NP_950356	NC_005303	104	129216	129845	630	-1	tdk	thymidine kinase	K00857	COG1435	F	Thymidine kinase
174	CaPaus	YP_001799288	NC_010544	578	731495	732094	600	-1	tdk	thymidine kinase	K00857	COG1435	F	Thymidine kinase
174	CaPmal	YP_002004180	NC_011047	138	179988	180569	582	-1	tdk	thymidine kinase	K00857	COG1435	F	Thymidine kinase
174	PNWB_v1	c3220	Contig1I	54	77142	77723	582	-1	tdk	thymidine kinase	K00857	COG1435	F	Thymidine kinase
175	CaPastA	YP_456800	NC_007716	604	628768	629040	273	1	rpmE	50S ribosomal protein L31	K02909	COG0254	J	Ribosomal protein L31
175	CaPastO	NP_950357	NC_005303	105	129965	130246	282	-1	rpmE	ribosomal protein L31	K02909	COG0254	J	Ribosomal protein L31
175	CaPaus	YP_001799289	NC_010544	579	732143	732382	240	-1	rpmE	50S ribosomal protein L31	K02909	COG0254	J	Ribosomal protein L31
175	CaPmal	YP_002004181	NC_011047	139	180620	180829	210	-1	rpmE	50S ribosomal protein L31	K02909	COG0254	J	Ribosomal protein L31
175	PNWB_v1	c3230	Contig1I	55	77759	77992	234	-1	rpmE	50S ribosomal protein L31	K02909	COG0254	J	Ribosomal protein L31
176	CaPastA	YP_456734	NC_007716	538	555854	557143	1290	-1	glyA	serine hydroxymethyltransferase	K00600	COG0112	E	Glycine/serine hydroxymethyltransferase
176	CaPastO	NP_950433	NC_005303	181	213971	215221	1251	1	glyA	glycine hydroxymethyltransferase	K00600	COG0112	E	Glycine/serine hydroxymethyltransferase
176	CaPaus	YP_001798850	NC_010544	140	209076	210317	1242	-1	glyA	serine hydroxymethyltransferase	K00600	COG0112	E	Glycine/serine hydroxymethyltransferase
176	CaPmal	YP_002004182	NC_011047	140	180988	182247	1260	-1	glyA	serine hydroxymethyltransferase	K00600	COG0112	E	Glycine/serine hydroxymethyltransferase
176	PNWB_v1	c3240	Contig1I	56	78169	79416	1248	-1	glyA	serine hydroxymethyltransferase	K00600	COG0112	E	Glycine/serine hydroxymethyltransferase
177	CaPastA	YP_456198	NC_007716	2	1709	2845	1137	1	dnaN	DNA polymerase III, beta subunit	K02338	COG0592	L	DNA polymerase sliding clamp subunit (PCNA homolog)
177	CaPastO	NP_950254	NC_005303	2	1831	2967	1137	1	dnaN	DNA polymerase III beta subunit	K02338	COG0592	L	DNA polymerase sliding clamp subunit (PCNA homolog)
177	CaPaus	YP_001798712	NC_010544	2	1418	2554	1137	1	dnaN	DNA polymerase III beta subunit	K02338	COG0592	L	DNA polymerase sliding clamp subunit (PCNA homolog)
177	CaPmal	YP_002004231	NC_011047	189	251977	253107	1131	1	dnaN	DNA polymerase III subunit beta	K02338	COG0592	L	DNA polymerase sliding clamp subunit (PCNA homolog)
177	PNWB_v1	c3250	Contig1I	57	79465	80130	666	-1	dnaN	DNA polymerase III subunit beta	K02338	COG0592	L	DNA polymerase sliding clamp subunit (PCNA homolog)
178	CaPastA	YP_456221	NC_007716	25	31581	34118	2538	1	nrdA	ribonucleoside-diphosphate reductase alpha chain	K00525	COG0209	F	Ribonucleotide reductase, alpha subunit
178	CaPastO	NP_950306	NC_005303	54	67342	69651	2310	1	nrdA	ribonucleotide reductase alpha subunit	K00525	COG0209	F	Ribonucleotide reductase, alpha subunit
178	CaPaus	YP_001798747	NC_010544	37	57002	59572	2571	1	nrdA	Ribonucleotide reductase, alpha subunit	K00525	COG0209	F	Ribonucleotide reductase, alpha subunit
178	CaPmal	YP_002004224	NC_011047	182	240542	243034	2493	-1	nrdA	ribonucleotide reductase subunit alpha	K00525	COG0209	F	Ribonucleotide reductase, alpha subunit
178	PNWB_v1	c3260	Contig2A	1	1433	3973	2541	-1	nrdA	ribonucleotide-diphosphate reductase subunit alpha	K00525	COG0209	F	Ribonucleotide reductase, alpha subunit
179	CaPastA	YP_456508	NC_007716	312	326074	327090	1017	-1	trpS	tryptophanyl-tRNA synthetase	K01867	COG0180	J	Tryptophanyl-tRNA synthetase
179	CaPastO	NP_950718	NC_005303	462	522922	523959	1038	1	trpS	tryptophanyl-tRNA synthetase	K01867	COG0180	J	Tryptophanyl-tRNA synthetase
179	CaPaus	YP_001799127	NC_010544	417	547768	548772	1005	1	trpS	Tryptophanyl-tRNA synthetase	K01867	COG0180	J	Tryptophanyl-tRNA synthetase
179	CaPmal	YP_002004132	NC_011047	90	121448	122479	1032	-1	trpS	tryptophanyl-tRNA synthetase	K01867	COG0180	J	Tryptophanyl-tRNA synthetase
179	PNWB_v1	c3280	Contig2A	3	6244	7275	1032	1	trpS	tryptophanyl-tRNA synthetase	K01867	COG0180	J	Tryptophanyl-tRNA synthetase
180	CaPastA	YP_456206	NC_007716	10	10110	11081	972	-1	holA	DNA polymerase III, delta subunit	K02340	COG1466	L	DNA polymerase III, delta subunit
180	CaPastO	NP_950268	NC_005303	16	19044	20015	972	-1	holA	DNA polymerase III delta subunit	K02340	COG1466	L	DNA polymerase III, delta subunit
180	CaPaus	YP_001798823	NC_010544	113	174078	175040	963	1	holA	DNA polymerase III, delta subunit	K02340	COG1466	L	DNA polymerase III, delta subunit
180	CaPmal	YP_002004288	NC_011047	246	327148	328122	975	1	holA	DNA polymerase III subunit delta	K02340	COG1466	L	DNA polymerase III, delta subunit
180	PNWB_v1	c3310	Contig2A	6	9265	10272	1008	1	holA	DNA polymerase III subunit delta	K02340	COG1466	L	DNA polymerase III, delta subunit
181	CaPastA	YP_456205	NC_007716	9	9511	10101	591	1	sua5	translation factor SUA5 protein	K07566	COG0009	J	Putative translation factor (SUA5)
181	CaPastO	NP_950267	NC_005303	15	18448	19005	558	1	sua5	translation factor	K07566	COG0009	J	Putative translation factor (SUA5)
181	CaPaus	YP_001798824	NC_010544	114	175035	175601	567	-1	sua5	Translation factor	K07566	COG0009	J	Putative translation factor (SUA5)
181	CaPmal	YP_002004211	NC_011047	169	223355	223918	564	-1	sua5	translation factor	K07566	COG0009	J	Putative translation factor (SUA5)
181	PNWB_v1	c3320	Contig2A	7	10290	10853	564	-1	sua5	translation factor	K07566	COG0009	J	Putative translation factor (SUA5)
182	CaPastA	YP_456204	NC_007716	8	8371	9426	1056	1	prfA	peptide chain release factor 1	K02835	COG0216	J	Protein chain release factor A
182	CaPastO	NP_950266	NC_005303	14	17300	18355	1056	1	prfA	protein chain release factor A	K02835	COG0216	J	Protein chain release factor A
182	CaPaus	YP_001798825	NC_010544	115	175594	176658	1065	-1	prfA	Protein chain release factor A	K02835	COG0216	J	Protein chain release factor A
182	CaPmal	YP_002004212	NC_011047	170	223990	225033	1044	-1	prfA	peptide chain release factor 1	K02835	COG0216	J	Protein chain release factor A
182	PNWB_v1	c3330	Contig2A	8	10861	11937	1077	-1	prfA	peptide chain release factor 1	K02835	COG0216	J	Protein chain release factor A
183	CaPastA	YP_456203	NC_007716	7	6961	8304	1344	1	dnaB	replicative DNA helicase	K02314	COG0305	L	Replicative DNA helicase
183	CaPastO	NP_950265	NC_005303	13	15886	17229	1344	1	dnaB	replicative DNA helicase	K02314	COG0305	L	Replicative DNA helicase
183	CaPaus	YP_001798826	NC_010544	116	176730	178073	1344	-1	dnaC	Replicative DNA helicase	K02314	COG0305	L	Replicative DNA helicase
183	CaPmal	YP_002004213	NC_011047	171	225096	226448	1353	-1	dnaB1	replicative DNA helicase	K02314	COG0305	L	Replicative DNA helicase
183	PNWB_v1	c3340	Contig2A	9	11966	13333	1368	-1	dnaB1	replicative DNA helicase	K02314	COG0305	L	Replicative DNA helicase
184	CaPastA	YP_456202	NC_007716	6	4415	6964	2550	1	NA	putative bifunctional signaling protein/50S ribosomal protein L9	NA	NA	X	NA
184	CaPastO	NP_950264	NC_005303	12	13316	15889	2574	1	NA	exopolyphosphatase-related protein	NA	NA	X	NA
184	CaPaus	YP_001798827	NC_010544	117	178070	180568	2499	-1	NA	putative bifunctional signaling protein/50S ribosomal protein L9	NA	NA	X	NA
184	CaPmal	YP_002004214	NC_011047	172	226451	228964	2514	-1	rplI	bifunctional signaling protein/50S ribosomal protein L9	NA	NA	X	NA
184	PNWB_v1	c3350	Contig2A	10	13330	15846	2517	-1	rplI	putative bifunctional signaling protein/50S ribosomal protein L9	NA	NA	X	NA
185	CaPastA	YP_456201	NC_007716	5	4082	4321	240	1	rpsR	30S ribosomal protein S18	K02963	COG0238	J	Ribosomal protein S18
185	CaPastO	NP_950263	NC_005303	11	13006	13245	240	1	rpsR	ribosomal protein S18	K02963	COG0238	J	Ribosomal protein S18
185	CaPaus	YP_001798828	NC_010544	118	180667	180903	237	-1	rpsR	30S ribosomal protein S18	K02963	COG0238	J	Ribosomal protein S18
185	CaPmal	YP_002004215	NC_011047	173	229041	229277	237	-1	rpsR	30S ribosomal protein S18	K02963	COG0238	J	Ribosomal protein S18
185	PNWB_v1	c3360	Contig2A	11	15956	16192	237	-1	rpsR	30S ribosomal protein S18	K02963	COG0238	J	Ribosomal protein S18
186	CaPastA	YP_456200	NC_007716	4	3633	3812	180	1	NA	hypothetical protein	K03111	COG0629	L	Single-stranded DNA-binding protein
186	CaPastO	NP_950262	NC_005303	10	12524	12868	345	1	ssb	single-stranded DNA-binding protein	K03111	COG0629	L	Single-stranded DNA-binding protein
186	CaPaus	YP_001798829	NC_010544	119	180927	181361	435	-1	ssb	Single-stranded DNA-binding protein	K03111	COG0629	L	Single-stranded DNA-binding protein
186	CaPmal	YP_002004216	NC_011047	174	229300	229716	417	-1	ssb	single-strand DNA-binding protein	K03111	COG0629	L	Single-stranded DNA-binding protein
186	PNWB_v1	c3370	Contig2A	12	16235	16708	474	-1	ssb2	single-stranded DNA-binding protein	K03111	COG0629	L	Single-stranded DNA-binding protein
187	CaPastA	YP_456199	NC_007716	3	3331	3618	288	1	rpsF	30S ribosomal protein S6	K02990	COG0360	J	Ribosomal protein S6
187	CaPastO	NP_950261	NC_005303	9	12171	12509	339	1	rpsF	ribosomal protein S6	K02990	COG0360	J	Ribosomal protein S6
187	CaPaus	YP_001798830	NC_010544	120	181488	181769	282	-1	rpsF	30S ribosomal protein S6	K02990	COG0360	J	Ribosomal protein S6
187	CaPmal	YP_002004217	NC_011047	175	229724	230008	285	-1	rpsF	30S ribosomal protein S6	K02990	COG0360	J	Ribosomal protein S6
187	PNWB_v1	c3380	Contig2A	13	16732	17025	294	-1	rpsF	30S ribosomal protein S6	K02990	COG0360	J	Ribosomal protein S6
188	CaPastA	YP_456731	NC_007716	535	550382	553093	2712	-1	ileS	isoleucyl-tRNA synthetase	K01870	COG0060	J	Isoleucyl-tRNA synthetase
188	CaPastO	NP_950436	NC_005303	184	218019	220721	2703	1	ileS	isoleucyl-tRNA synthetase	K01870	COG0060	J	Isoleucyl-tRNA synthetase
188	CaPaus	YP_001798969	NC_010544	259	359303	361993	2691	-1	ileS	isoleucyl-tRNA synthetase	K01870	COG0060	J	Isoleucyl-tRNA synthetase
188	CaPmal	YP_002004286	NC_011047	244	323582	326320	2739	1	ileS	isoleucyl-tRNA synthetase	K01870	COG0060	J	Isoleucyl-tRNA synthetase
188	PNWB_v1	c3410	Contig2A	16	18695	21481	2787	-1	ileS	isoleucyl-tRNA synthetase	K01870	COG0060	J	Isoleucyl-tRNA synthetase
189	CaPastA	YP_456732	NC_007716	536	553182	554273	1092	-1	NA	GTP-dependent nucleic acid-binding protein EngD	K06942	COG0012	J	Predicted GTPase, probable translation factor
189	CaPastO	NP_950435	NC_005303	183	216815	217906	1092	1	NA	hypothetical protein	K06942	COG0012	J	Predicted GTPase, probable translation factor
189	CaPaus	YP_001798970	NC_010544	260	362033	363124	1092	-1	NA	GTP-dependent nucleic acid-binding protein EngD	K06942	COG0012	J	Predicted GTPase, probable translation factor
189	CaPmal	YP_002004285	NC_011047	243	322437	323534	1098	1	NA	GTP-dependent nucleic acid-binding protein EngD	K06942	COG0012	J	Predicted GTPase, probable translation factor
189	PNWB_v1	c3420	Contig2A	17	21566	22675	1110	-1	engD	GTP-dependent nucleic acid-binding protein EngD	K06942	COG0012	J	Predicted GTPase, probable translation factor
190	CaPastA	YP_456842	NC_007716	646	675944	676531	588	1	pduL	propanediol utilisation protein PduL	NA	NA	X	NA
190	CaPastO	NP_950981	NC_005303	724	823075	823671	597	1	NA	hypothetical protein	NA	NA	X	NA
190	CaPaus	YP_001798926	NC_010544	216	304174	304749	576	-1	pduL	Putative propanediol utilization protein	NA	NA	X	NA
190	CaPmal	YP_002004258	NC_011047	216	297471	298049	579	1	pduL	propanediol utilization protein	NA	NA	X	NA
190	PNWB_v1	c3430	Contig2A	18	23006	23590	585	1	pduL	propanediol utilization protein PduL	NA	NA	X	NA
191	CaPastA	YP_456843	NC_007716	647	676844	678097	1254	1	NA	HD superfamily phosphohydrolase	K06885	COG1078	R	HD superfamily phosphohydrolases
191	CaPastO	NP_950982	NC_005303	725	823978	825231	1254	1	NA	HD superfamily phosphohydrolase	K06885	COG1078	R	HD superfamily phosphohydrolases
191	CaPaus	YP_001798925	NC_010544	215	302459	303718	1260	-1	NA	HD superfamily phosphohydrolase	K06885	COG1078	R	HD superfamily phosphohydrolases
191	CaPmal	YP_002004259	NC_011047	217	298151	299398	1248	1	NA	HD superfamily phosphohydrolase	K06885	COG1078	R	HD superfamily phosphohydrolases
191	PNWB_v1	c3440	Contig2A	19	23881	25203	1323	1	NA	HD superfamily phosphohydrolase	K06885	COG1078	R	HD superfamily phosphohydrolases
192	CaPastA	YP_456844	NC_007716	648	678197	679003	807	1	ksgA	dimethyladenosine transferase	K02528	COG0030	J	Dimethyladenosine transferase (rRNA methylation)
192	CaPastO	NP_950983	NC_005303	726	825338	826144	807	1	ksgA	dimethyladenosine transferase	K02528	COG0030	J	Dimethyladenosine transferase (rRNA methylation)
192	CaPaus	YP_001798924	NC_010544	214	301582	302436	855	-1	ksgA	dimethyladenosine transferase	K02528	COG0030	J	Dimethyladenosine transferase (rRNA methylation)
192	CaPmal	YP_002004260	NC_011047	218	299403	300212	810	1	ksgA	dimethyladenosine transferase	K02528	COG0030	J	Dimethyladenosine transferase (rRNA methylation)
192	PNWB_v1	c3450	Contig2A	20	25200	26027	828	1	ksgA	dimethyladenosine transferase	K02528	COG0030	J	Dimethyladenosine transferase (rRNA methylation)
193	CaPastA	YP_456845	NC_007716	649	679266	679565	300	1	spoVG	regulatory protein SpoVG	K06412	COG2088	M	Uncharacterized protein, involved in the regulation of septum location
193	CaPastO	NP_950984	NC_005303	727	826420	826719	300	1	NA	hypothetical protein	K06412	COG2088	M	Uncharacterized protein, involved in the regulation of septum location
193	CaPaus	YP_001798923	NC_010544	213	301174	301464	291	-1	spoVG	regulatory protein SpoVG	K06412	COG2088	M	Uncharacterized protein, involved in the regulation of septum location
193	CaPmal	YP_002004261	NC_011047	219	300322	300621	300	1	spoVG	septation protein SpoVG	K06412	COG2088	M	Uncharacterized protein, involved in the regulation of septum location
193	PNWB_v1	c3460	Contig2A	21	26219	26602	384	1	spoVG	regulatory protein SpoVG	K06412	COG2088	M	Uncharacterized protein, involved in the regulation of septum location
194	CaPastA	YP_456846	NC_007716	650	679761	681761	2001	1	zntA	cation uptake P-type ATPase	NA	NA	X	NA
194	CaPastO	NP_950985	NC_005303	728	826939	828939	2001	1	zntA	cation transport ATPase	NA	NA	X	NA
194	CaPaus	YP_001798922	NC_010544	212	299187	301103	1917	-1	zntA	Cation transport ATPase	NA	NA	X	NA
194	CaPmal	YP_002004262	NC_011047	220	300693	302708	2016	1	zntA	cation uptake P-type ATPase	NA	NA	X	NA
194	PNWB_v1	c3470	Contig2A	22	26779	28836	2058	1	zntA	cation uptake P-type ATPase	NA	NA	X	NA
195	CaPastA	YP_456527	NC_007716	331	352695	354077	1383	1	tldD	TldD protein	K03568	COG0312	R	Predicted Zn-dependent proteases and their inactivated homologs
195	CaPastO	NP_950699	NC_005303	442	489196	490575	1380	1	tldD	hypothetical protein	K03568	COG0312	R	Predicted Zn-dependent proteases and their inactivated homologs
195	CaPaus	YP_001799278	NC_010544	568	720885	722282	1398	-1	tldD	Zn-dependent proteases, TldD	K03568	COG0312	R	Predicted Zn-dependent proteases and their inactivated homologs
195	CaPmal	YP_002004356	NC_011047	314	405174	406562	1389	1	tldD	Zn-dependent protease	K03568	COG0312	R	Predicted Zn-dependent proteases and their inactivated homologs
195	PNWB_v1	c3480	Contig2A	23	28901	30289	1389	1	tldD	Zn-dependent protease	K03568	COG0312	R	Predicted Zn-dependent proteases and their inactivated homologs
196	CaPastA	YP_456528	NC_007716	332	354074	355450	1377	1	pmbA	PmbA protein	NA	NA	X	NA
196	CaPastO	YP_002154424	NC_005303	443	490572	491948	1377	1	pmbA	hypothetical protein	NA	NA	X	NA
196	CaPaus	YP_001799277	NC_010544	567	719585	720805	1221	-1	pmbA	Pmba-related protein	NA	NA	X	NA
196	CaPmal	YP_002004357	NC_011047	315	406568	407878	1311	1	pmbA	modulator of DNA gyrase	NA	NA	X	NA
196	PNWB_v1	c3490	Contig2A	24	30310	31632	1323	1	pmbA	PmbA protein	NA	NA	X	NA
197	CaPastA	YP_456818	NC_007716	622	646692	647765	1074	-1	mntB	ABC-type Mn/Zn transport system, membrane protein	K11709	COG1108	P	ABC-type Mn2+/Zn2+ transport systems, permease components
197	CaPaus	YP_001799069	NC_010544	359	478522	479427	906	1	znuB	ABC-type Zn/Mn transport system,permease component	K11708	COG1108	P	ABC-type Mn2+/Zn2+ transport systems, permease components
197	CaPmal	YP_002004046	NC_011047	4	3513	4586	1074	-1	znuB	ABC-type Mn/Zn transport system, permease component, fragment	K11708	COG1108	P	ABC-type Mn2+/Zn2+ transport systems, permease components
197	CaPmal	YP_002004520	NC_011047	476	597358	598431	1074	1	znuB	ABC-type Mn/Zn transport system, permease component, fragment	K11708	COG1108	P	ABC-type Mn2+/Zn2+ transport systems, permease components
197	PNWB_v1	c3520	Contig2A	27	33437	34489	1053	-1	znuB1	ABC-type Mn/Zn transport system, permease component	K11708	COG1108	P	ABC-type Mn2+/Zn2+ transport systems, permease components
198	CaPastA	YP_456799	NC_007716	603	628409	628597	189	1	rpmB	50S ribosomal protein L28	K02902	COG0227	J	Ribosomal protein L28
198	CaPastO	NP_950358	NC_005303	106	130471	130659	189	-1	rpmB	ribosomal protein L28	K02902	COG0227	J	Ribosomal protein L28
198	CaPaus	YP_001799290	NC_010544	580	732429	732614	186	-1	rpmB	50S ribosomal protein L28	K02902	COG0227	J	Ribosomal protein L28
198	CaPmal	YP_002004311	NC_011047	269	358108	358296	189	1	rpmB	50S ribosomal protein L28	K02902	COG0227	J	Ribosomal protein L28
198	PNWB_v1	c3570	Contig2A	31	39158	39346	189	1	rpmB	50S ribosomal protein L28	K02902	COG0227	J	Ribosomal protein L28
199	CaPastA	YP_456746	NC_007716	550	569807	570718	912	-1	cdsA	phosphatidate cytidylyltransferase	K00981	COG0575	I	CDP-diglyceride synthetase
199	CaPastO	NP_950421	NC_005303	169	199795	200712	918	1	cdsA	CDP-diglyceride synthetase	K00981	COG0575	I	CDP-diglyceride synthetase
199	CaPaus	YP_001799101	NC_010544	391	508715	509617	903	-1	cdsA	Phosphatidate cytidylyltransferase	K00981	COG0575	I	CDP-diglyceride synthetase
199	CaPmal	YP_002004270	NC_011047	228	307933	308826	894	1	cdsA	phosphatidate cytidylyltransferase	K00981	COG0575	I	CDP-diglyceride synthetase
199	PNWB_v1	c3580	Contig2A	32	40057	41220	1164	-1	cdsA	phosphatidate cytidylyltransferase	K00981	COG0575	I	CDP-diglyceride synthetase
200	CaPastA	YP_456747	NC_007716	551	570779	571333	555	-1	frr	ribosome recycling factor	K02838	COG0233	J	Ribosome recycling factor
200	CaPastO	NP_950420	NC_005303	168	199169	199723	555	1	frr	ribosome recycling factor	K02838	COG0233	J	Ribosome recycling factor
200	CaPaus	YP_001799102	NC_010544	392	509653	510207	555	-1	frr	ribosome recycling factor	K02838	COG0233	J	Ribosome recycling factor
200	CaPmal	YP_002004269	NC_011047	227	307318	307875	558	1	frr	ribosome recycling factor	K02838	COG0233	J	Ribosome recycling factor
200	PNWB_v1	c3590	Contig2A	33	41242	41805	564	-1	frr	ribosome recycling factor	K02838	COG0233	J	Ribosome recycling factor
201	CaPastA	YP_456748	NC_007716	552	571336	572061	726	-1	pyrH	uridylate kinase	K09903	COG0528	F	Uridylate kinase
201	CaPastO	NP_950419	NC_005303	167	198441	199166	726	1	pyrH	uridylate kinase	K09903	COG0528	F	Uridylate kinase
201	CaPaus	YP_001799103	NC_010544	393	510210	510926	717	-1	pyrH	uridylate kinase	K09903	COG0528	F	Uridylate kinase
201	CaPmal	YP_002004268	NC_011047	226	306590	307315	726	1	pyrH	uridylate kinase	K09903	COG0528	F	Uridylate kinase
201	PNWB_v1	c3600	Contig2A	34	41807	42520	714	-1	pyrH	uridylate kinase	K09903	COG0528	F	Uridylate kinase
202	CaPastA	YP_456749	NC_007716	553	572152	572976	825	-1	tsf	elongation factor Ts	K02357	COG0264	J	Translation elongation factor Ts
202	CaPastO	NP_950418	NC_005303	166	197515	198351	837	1	tsf	translation elongation factor Ts	K02357	COG0264	J	Translation elongation factor Ts
202	CaPaus	YP_001799104	NC_010544	394	510973	511806	834	-1	tsf	elongation factor Ts	K02357	COG0264	J	Translation elongation factor Ts
202	CaPmal	YP_002004267	NC_011047	225	305659	306498	840	1	tsf	elongation factor Ts	K02357	COG0264	J	Translation elongation factor Ts
202	PNWB_v1	c3610	Contig2A	35	42677	43369	693	-1	tsf	elongation factor Ts	K02357	COG0264	J	Translation elongation factor Ts
203	CaPastA	YP_456750	NC_007716	554	573079	573888	810	-1	rpsB	30S ribosomal protein S2	K02967	COG0052	J	Ribosomal protein S2
203	CaPastO	NP_950417	NC_005303	165	196610	197425	816	1	rpsB	ribosomal protein S2	K02967	COG0052	J	Ribosomal protein S2
203	CaPaus	YP_001799105	NC_010544	395	511915	512697	783	-1	rpsB	30S ribosomal protein S2	K02967	COG0052	J	Ribosomal protein S2
203	CaPmal	YP_002004266	NC_011047	224	304867	305601	735	1	rpsB	30S ribosomal protein S2	K02967	COG0052	J	Ribosomal protein S2
203	PNWB_v1	c3620	Contig2A	36	43518	44276	759	-1	rpsB	30S ribosomal protein S2	K02967	COG0052	J	Ribosomal protein S2
204	CaPastA	YP_456751	NC_007716	555	574380	574877	498	-1	dut	deoxyuridine 5'-triphosphate nucleotidohydrolase	K01520	COG0756	F	dUTPase
204	CaPastO	NP_950416	NC_005303	164	195555	196007	453	1	dut	dUTPase	K01520	COG0756	F	dUTPase
204	CaPaus	YP_001799106	NC_010544	396	512973	513434	462	-1	dut	DeoxyUTP pyrophosphatase	K01520	COG0756	F	dUTPase
204	CaPmal	YP_002004265	NC_011047	223	304219	304686	468	1	dut	Deoxyuridine 5\'-triphosphate nucleotidohydrolase	K01520	COG0756	F	dUTPase
204	PNWB_v1	c3630	Contig2A	37	44462	44911	450	-1	dut	deoxyuridine 5'-triphosphate nucleotidohydrolase	K01520	COG0756	F	dUTPase
205	CaPastA	YP_456286	NC_007716	90	101041	102756	1716	-1	NA	kinase related to dihydroxyacetone kinase	K07030	COG1461	R	Predicted kinase related to dihydroxyacetone kinase
205	CaPastO	NP_950917	NC_005303	660	754207	755922	1716	1	NA	hypothetical protein	K07030	COG1461	R	Predicted kinase related to dihydroxyacetone kinase
205	CaPaus	YP_001799374	NC_010544	664	842798	844462	1665	1	NA	Putative kinase related to dihydroxyacetone kinase	K07030	COG1461	R	Predicted kinase related to dihydroxyacetone kinase
205	CaPmal	YP_002004310	NC_011047	268	356408	357892	1485	-1	NA	kinase	K07030	COG1461	R	Predicted kinase related to dihydroxyacetone kinase
205	PNWB_v1	c3650	Contig2A	39	46601	48286	1686	1	NA	dihydroxyacetone/glyceraldehyde kinase	K07030	COG1461	R	Predicted kinase related to dihydroxyacetone kinase
206	CaPastA	YP_456768	NC_007716	572	592123	593196	1074	-1	nusA	transcription elongation factor NusA	K02600	COG0195	K	Transcription elongation factor
206	CaPastO	NP_950400	NC_005303	148	175032	176105	1074	1	nusA	transcription terminator	K02600	COG0195	K	Transcription elongation factor
206	CaPaus	YP_001799191	NC_010544	481	601078	602151	1074	1	nusA	transcription elongation factor NusA	K02600	COG0195	K	Transcription elongation factor
206	CaPmal	YP_002004346	NC_011047	304	394158	395234	1077	1	nusA	transcription elongation factor NusA	K02600	COG0195	K	Transcription elongation factor
206	PNWB_v1	c3660	Contig2A	40	48702	49757	1056	1	nusA	transcription elongation factor NusA	K02600	COG0195	K	Transcription elongation factor
207	CaPastA	YP_456766	NC_007716	570	589840	591711	1872	-1	infB	translation initiation factor IF-2	K02519	COG0532	J	Translation initiation factor 2 (IF-2; GTPase)
207	CaPastO	NP_950402	NC_005303	150	176528	178387	1860	1	infB	translation initiation factor 2	K02519	COG0532	J	Translation initiation factor 2 (IF-2; GTPase)
207	CaPaus	YP_001799193	NC_010544	483	602491	604362	1872	1	infB	translation initiation factor IF-2	K02519	COG0532	J	Translation initiation factor 2 (IF-2; GTPase)
207	CaPmal	YP_002004348	NC_011047	306	395553	397415	1863	1	infB	translation initiation factor IF-2	K02519	COG0532	J	Translation initiation factor 2 (IF-2; GTPase)
207	PNWB_v1	c3670	Contig2A	41	49962	51767	1806	1	infB	translation initiation factor IF-2	K02519	COG0532	J	Translation initiation factor 2 (IF-2; GTPase)
208	CaPastA	YP_456765	NC_007716	569	589495	589836	342	-1	rbfA	ribosome-binding factor A	K02834	COG0858	J	Ribosome-binding factor A
208	CaPastO	NP_950403	NC_005303	151	178391	178732	342	1	rbfA	ribosome-binding factor A	K02834	COG0858	J	Ribosome-binding factor A
208	CaPaus	YP_001799194	NC_010544	484	604365	604709	345	1	rbfA	Ribosome-binding factor A	K02834	COG0858	J	Ribosome-binding factor A
208	CaPmal	YP_002004349	NC_011047	307	397421	397765	345	1	rbfA	ribosome-binding factor A	K02834	COG0858	J	Ribosome-binding factor A
208	PNWB_v1	c3680	Contig2A	42	51760	52110	351	1	rbfA	ribosome-binding factor A	K02834	COG0858	J	Ribosome-binding factor A
209	CaPastA	YP_456761	NC_007716	565	584431	586872	2442	1	priA	primosomal protein N'	K04066	COG1198	L	Primosomal protein N' (replication factor Y) - superfamily II helicase
209	CaPastO	NP_950406	NC_005303	154	181476	183935	2460	-1	priA	primosomal protein N'	K04066	COG1198	L	Primosomal protein N' (replication factor Y) - superfamily II helicase
209	CaPaus	YP_001798801	NC_010544	91	137056	139419	2364	1	priA	Primosomal protein N	K04066	COG1198	L	Primosomal protein N' (replication factor Y) - superfamily II helicase
209	CaPmal	YP_002004350	NC_011047	308	397841	400198	2358	1	priA	primosome assembly protein	K04066	COG1198	L	Primosomal protein N' (replication factor Y) - superfamily II helicase
209	PNWB_v1	c3690	Contig2A	43	52185	54407	2223	1	priA	primosomal protein N'	K04066	COG1198	L	Primosomal protein N' (replication factor Y) - superfamily II helicase
210	CaPastA	YP_456516	NC_007716	320	341404	342099	696	1	NA	hypothetical protein	K08591	COG0344	S	Predicted membrane protein
210	CaPastO	NP_950688	NC_005303	431	477674	478192	519	1	NA	hypothetical protein	K08591	COG0344	S	Predicted membrane protein
210	CaPaus	YP_001798918	NC_010544	208	295383	296060	678	-1	NA	hypothetical protein	K08591	COG0344	S	Predicted membrane protein
210	CaPmal	YP_002004210	NC_011047	168	222566	223201	636	-1	NA	hypothetical protein	K08591	COG0344	S	Predicted membrane protein
210	PNWB_v1	c3700	Contig2A	44	54449	55063	615	-1	plsY	glycerol-3-phosphate acyltransferase PlsY	K08591	COG0344	S	Predicted membrane protein
211	CaPastA	YP_456332	NC_007716	136	163006	164097	1092	1	acoA	pyruvate dehydrogenase E1 component alpha subunit	K00161	COG1071	C	Pyruvate/2-oxoglutarate dehydrogenase complex, dehydrogenase (E1) component, eukaryotic type, alpha subunit
211	CaPastO	NP_950852	NC_005303	596	677998	679089	1092	1	acoA	thiamine pyrophosphate-dependent dehydrogenase, E1 component alpha subunit	K00161	COG1071	C	Pyruvate/2-oxoglutarate dehydrogenase complex, dehydrogenase (E1) component, eukaryotic type, alpha subunit
211	CaPaus	YP_001799261	NC_010544	551	695168	696259	1092	1	pdhA	Pyruvate dehydrogenase E1 component,alpha subunit	K00161	COG1071	C	Pyruvate/2-oxoglutarate dehydrogenase complex, dehydrogenase (E1) component, eukaryotic type, alpha subunit
211	CaPmal	YP_002004196	NC_011047	154	198915	200006	1092	-1	acoA	thiamine pyrophosphate-dependent dehydrogenase, E1 component subunit alpha	K00161	COG1071	C	Pyruvate/2-oxoglutarate dehydrogenase complex, dehydrogenase (E1) component, eukaryotic type, alpha subunit
211	PNWB_v1	c3800	Contig2A	54	67914	69020	1107	1	pdhA	pyruvate dehydrogenase E1 component subunit alpha	K00161	COG1071	C	Pyruvate/2-oxoglutarate dehydrogenase complex, dehydrogenase (E1) component, eukaryotic type, alpha subunit
212	CaPastA	YP_456333	NC_007716	137	164100	165074	975	1	acoB	pyruvate dehydrogenase E1 component beta subunit	K00162	COG0022	C	Pyruvate/2-oxoglutarate dehydrogenase complex, dehydrogenase (E1) component, eukaryotic type, beta subunit
212	CaPastO	NP_950853	NC_005303	597	679092	680066	975	1	acoB	thiamine pyrophosphate-dependent dehydrogenase, E1 component beta subunit	K00162	COG0022	C	Pyruvate/2-oxoglutarate dehydrogenase complex, dehydrogenase (E1) component, eukaryotic type, beta subunit
212	CaPaus	YP_001799262	NC_010544	552	696262	697239	978	1	pdhB	Pyruvate dehydrogenase E1 comp, beta subunit	K00162	COG0022	C	Pyruvate/2-oxoglutarate dehydrogenase complex, dehydrogenase (E1) component, eukaryotic type, beta subunit
212	CaPmal	YP_002004195	NC_011047	153	197935	198915	981	-1	acoB	pyruvate dehydrogenase E1 component subunit beta	K00162	COG0022	C	Pyruvate/2-oxoglutarate dehydrogenase complex, dehydrogenase (E1) component, eukaryotic type, beta subunit
212	PNWB_v1	c3810	Contig2A	55	69025	70017	993	1	pdhB	pyruvate dehydrogenase E1 component subunit beta	K00162	COG0022	C	Pyruvate/2-oxoglutarate dehydrogenase complex, dehydrogenase (E1) component, eukaryotic type, beta subunit
213	CaPastA	YP_456334	NC_007716	138	165266	166519	1254	1	aceF	branched-chain alpha-keto acid dehydrogenase subunit E2	K00627	COG0508	C	Pyruvate/2-oxoglutarate dehydrogenase complex, dihydrolipoamide acyltransferase (E2) component, and related enzymes
213	CaPastO	NP_950854	NC_005303	598	680390	681574	1185	1	aceF	dihydrolipoamide acyltransferase	K00627	COG0508	C	Pyruvate/2-oxoglutarate dehydrogenase complex, dihydrolipoamide acyltransferase (E2) component, and related enzymes
213	CaPaus	YP_001799263	NC_010544	553	697260	698483	1224	1	pdhC	branched-chain alpha-keto acid dehydrogenase subunit E2	K00627	COG0508	C	Pyruvate/2-oxoglutarate dehydrogenase complex, dihydrolipoamide acyltransferase (E2) component, and related enzymes
213	CaPmal	YP_002004194	NC_011047	152	196639	197898	1260	-1	aceF	branched-chain alpha-keto acid dehydrogenase E2 subunit	K00627	COG0508	C	Pyruvate/2-oxoglutarate dehydrogenase complex, dihydrolipoamide acyltransferase (E2) component, and related enzymes
213	PNWB_v1	c3830	Contig2A	57	70439	71179	741	1	pdhC	branched-chain alpha-keto acid dehydrogenase subunit E2	K00627	COG0508	C	Pyruvate/2-oxoglutarate dehydrogenase complex, dihydrolipoamide acyltransferase (E2) component, and related enzymes
214	CaPastA	YP_456335	NC_007716	139	166541	167914	1374	1	lpd	dihydrolipoamide dehydrogenase	K00382	COG1249	C	Pyruvate/2-oxoglutarate dehydrogenase complex, dihydrolipoamide dehydrogenase (E3) component, and related enzymes
214	CaPastO	NP_950855	NC_005303	599	681596	682969	1374	1	lpd	fatty acid/phospholipid biosynthesis enzyme	K00382	COG1249	C	Pyruvate/2-oxoglutarate dehydrogenase complex, dihydrolipoamide dehydrogenase (E3) component, and related enzymes
214	CaPaus	YP_001799264	NC_010544	554	698506	699879	1374	1	pdhD	Dihydrolipoamide dehydrogenase	K00382	COG1249	C	Pyruvate/2-oxoglutarate dehydrogenase complex, dihydrolipoamide dehydrogenase (E3) component, and related enzymes
214	CaPmal	YP_002004193	NC_011047	151	195227	196609	1383	-1	lpd	dihydrolipoamide dehydrogenase	K00382	COG1249	C	Pyruvate/2-oxoglutarate dehydrogenase complex, dihydrolipoamide dehydrogenase (E3) component, and related enzymes
214	PNWB_v1	c3840	Contig2B	1	144	1319	1176	1	pdhD	dihydrolipoamide dehydrogenase	K00382	COG1249	C	Pyruvate/2-oxoglutarate dehydrogenase complex, dihydrolipoamide dehydrogenase (E3) component, and related enzymes
215	CaPastA	YP_456336	NC_007716	140	168348	169115	768	1	tatD	Mg-dependent DNase	K03424	COG0084	L	Mg-dependent DNase
215	CaPastO	NP_950857	NC_005303	601	684032	684799	768	1	tatD	Mg-dependent DNase	K03424	COG0084	L	Mg-dependent DNase
215	CaPaus	YP_001799265	NC_010544	555	700406	701173	768	1	tatD	Mg-dependent DNase	K03424	COG0084	L	Mg-dependent DNase
215	CaPmal	YP_002004192	NC_011047	150	194242	194994	753	-1	tatD	Mg-dependent DNase	K03424	COG0084	L	Mg-dependent DNase
215	PNWB_v1	c3850	Contig2B	2	2024	2803	780	1	tatD	Mg-dependent DNase	K03424	COG0084	L	Mg-dependent DNase
216	CaPastA	YP_456309	NC_007716	113	132166	132738	573	-1	NA	hypothetical protein	NA	NA	X	NA
216	CaPastO	NP_950874	NC_005303	618	706378	706956	579	1	NA	hypothetical protein	NA	NA	X	NA
216	CaPaus	YP_001799204	NC_010544	494	615205	615798	594	-1	NA	Similar to phage-related protein predicted endonuclease	NA	NA	X	NA
216	CaPmal	YP_002004133	NC_011047	91	122661	123245	585	-1	NA	hypothetical protein	NA	NA	X	NA
216	PNWB_v1	c3860	Contig2B	3	2866	3381	516	1	NA	phage-related protein	NA	NA	X	NA
217	CaPastA	YP_456789	NC_007716	593	614810	616540	1731	-1	aspS	aspartyl-tRNA synthetase	K01876	COG0173;COG0017	J	Aspartyl-tRNA synthetase;Aspartyl/asparaginyl-tRNA synthetases
217	CaPastO	NP_950380	NC_005303	128	152425	154185	1761	1	aspS	aspartyl-tRNA synthetase	K01876	COG0173;COG0017	J	Aspartyl-tRNA synthetase;Aspartyl/asparaginyl-tRNA synthetases
217	CaPaus	YP_001799072	NC_010544	362	482445	484130	1686	1	aspS	aspartyl-tRNA synthetase	K01876	COG0173;COG0017	J	Aspartyl-tRNA synthetase;Aspartyl/asparaginyl-tRNA synthetases
217	CaPmal	YP_002004304	NC_011047	262	344808	346532	1725	1	aspS	aspartyl-tRNA synthetase	K01876	COG0173;COG0017	J	Aspartyl-tRNA synthetase;Aspartyl/asparaginyl-tRNA synthetases
217	PNWB_v1	c3920	Contig2B	7	12371	14113	1743	-1	aspS	aspartyl-tRNA synthetase	K01876	COG0173;COG0017	J	Aspartyl-tRNA synthetase;Aspartyl/asparaginyl-tRNA synthetases
218	CaPastA	YP_456790	NC_007716	594	616530	617813	1284	-1	hisS	histidyl-tRNA synthetase	K01892	COG0124	J	Histidyl-tRNA synthetase
218	CaPastO	NP_950379	NC_005303	127	151153	152421	1269	1	hisS	histidyl-tRNA synthetase	K01892	COG0124	J	Histidyl-tRNA synthetase
218	CaPaus	YP_001799071	NC_010544	361	481187	482434	1248	1	hisS	histidyl-tRNA synthetase	K01892	COG0124	J	Histidyl-tRNA synthetase
218	CaPmal	YP_002004303	NC_011047	261	343540	344811	1272	1	hisS	histidyl-tRNA synthetase	K01892	COG0124	J	Histidyl-tRNA synthetase
218	PNWB_v1	c3930	Contig2B	8	14113	15402	1290	-1	hisS	histidyl-tRNA synthetase	K01892	COG0124	J	Histidyl-tRNA synthetase
219	CaPastA	YP_456793	NC_007716	597	620396	621532	1137	-1	mnmA	tRNA-specific 2-thiouridylase MnmA	K00566	COG0482	J	Predicted tRNA(5-methylaminomethyl-2-thiouridylate) methyltransferase, contains the PP-loop ATPase domain
219	CaPastO	NP_950377	NC_005303	125	147401	148537	1137	1	trmU	tRNA(5-methylaminomethyl-2-thiouridylate)	K00566	COG0482	J	Predicted tRNA(5-methylaminomethyl-2-thiouridylate) methyltransferase, contains the PP-loop ATPase domain
219	CaPaus	YP_001799325	NC_010544	615	780909	782036	1128	1	mnmA	tRNA-specific 2-thiouridylase MnmA	K00566	COG0482	J	Predicted tRNA(5-methylaminomethyl-2-thiouridylate) methyltransferase, contains the PP-loop ATPase domain
219	CaPmal	YP_002004219	NC_011047	177	233274	234431	1158	-1	mnmA	tRNA-specific 2-thiouridylase MnmA	K00566	COG0482	J	Predicted tRNA(5-methylaminomethyl-2-thiouridylate) methyltransferase, contains the PP-loop ATPase domain
219	PNWB_v1	c3940	Contig2B	9	15563	16714	1152	-1	mnmA	tRNA-specific 2-thiouridylase MnmA	K00566	COG0482	J	Predicted tRNA(5-methylaminomethyl-2-thiouridylate) methyltransferase, contains the PP-loop ATPase domain
220	CaPastA	YP_456501	NC_007716	305	320029	321141	1113	1	prfB	peptide chain release factor 2	K02836	COG1186	J	Protein chain release factor B
220	CaPastO	NP_950725	NC_005303	469	529079	530188	1110	-1	prfB	protein chain release factor B	K02836	COG1186	J	Protein chain release factor B
220	CaPaus	YP_001799135	NC_010544	425	556691	557803	1113	-1	prfB	Protein chain release factor B	K02836	COG1186	J	Protein chain release factor B
220	CaPmal	YP_002004139	NC_011047	97	130543	131634	1092	-1	prfB	peptide chain release factor 2	K02836	COG1186	J	Protein chain release factor B
220	PNWB_v1	c3970	Contig2B	12	19400	20494	1095	-1	prfB	peptide chain release factor 2	K02836	COG1186	J	Protein chain release factor B
221	CaPastA	YP_456500	NC_007716	304	317518	320025	2508	1	secA	preprotein translocase subunit SecA	K03070	COG0653	U	Preprotein translocase subunit SecA (ATPase, RNA helicase)
221	CaPastO	NP_950726	NC_005303	470	530192	532699	2508	-1	secA	preprotein translocase subunit SecA	K03070	COG0653	U	Preprotein translocase subunit SecA (ATPase, RNA helicase)
221	CaPaus	YP_001799136	NC_010544	426	557807	560305	2499	-1	secA	preprotein translocase subunit SecA	K03070	COG0653	U	Preprotein translocase subunit SecA (ATPase, RNA helicase)
221	CaPmal	YP_002004140	NC_011047	98	131731	134124	2394	-1	secA	preprotein translocase subunit SecA	K03070	COG0653	U	Preprotein translocase subunit SecA (ATPase, RNA helicase)
221	PNWB_v1	c3980	Contig2B	13	20533	23052	2520	-1	secA	preprotein translocase subunit SecA	K03070	COG0653	U	Preprotein translocase subunit SecA (ATPase, RNA helicase)
222	CaPastA	YP_456223	NC_007716	27	37720	38157	438	1	mscL	large-conductance mechanosensitive channel	K03282	COG1970	M	Large-conductance mechanosensitive channel
222	CaPastO	NP_950310	NC_005303	58	75777	76295	519	1	mscL	large-conductance mechanosensitive channel	K03282	COG1970	M	Large-conductance mechanosensitive channel
222	CaPaus	YP_001798791	NC_010544	81	123394	123798	405	1	mscL	Putative large-conductance mechanosensitive channel	K03282	COG1970	M	Large-conductance mechanosensitive channel
222	CaPmal	YP_002004364	NC_011047	322	412047	412466	420	-1	mscL	large-conductance mechanosensitive channel	K03282	COG1970	M	Large-conductance mechanosensitive channel
222	PNWB_v1	c3990	Contig2B	14	23551	23979	429	-1	mscL	large-conductance mechanosensitive channel	K03282	COG1970	M	Large-conductance mechanosensitive channel
223	CaPastA	YP_456288	NC_007716	92	104499	105713	1215	-1	potD	spermidine/putrescine-binding protein	K11069	COG0687	E	Spermidine/putrescine-binding periplasmic protein
223	CaPastO	NP_950914	NC_005303	657	749974	751200	1227	1	potD	spermidine/putrescine-binding periplasmic	K11069	COG0687	E	Spermidine/putrescine-binding periplasmic protein
223	CaPaus	YP_001798810	NC_010544	100	152524	153567	1044	-1	potD	ABC-type spermidine/putrescine-binding periplasmic protein	K11069	COG0687	E	Spermidine/putrescine-binding periplasmic protein
223	CaPmal	YP_002004326	NC_011047	284	371799	373043	1245	1	potD	ABC-type spermidine/putrescine transport system, periplasmic protein	K11069	COG0687	E	Spermidine/putrescine-binding periplasmic protein
223	PNWB_v1	c4010	Contig3A	1	160	1350	1191	-1	potD	ABC-type spermidine/putrescine transport system, periplasmic protein	K11069	COG0687	E	Spermidine/putrescine-binding periplasmic protein
224	CaPastA	YP_456289	NC_007716	93	105732	106622	891	-1	potC	ABC-type spermidine/putrescine transport system, permease protein PotC	K11070	COG1177	E	ABC-type spermidine/putrescine transport system, permease component II
224	CaPastO	NP_950913	NC_005303	656	748973	749977	1005	1	potC	ABC-type spermidine/putrescine transport system, permease component II	K11070	COG1177	E	ABC-type spermidine/putrescine transport system, permease component II
224	CaPaus	YP_001798811	NC_010544	101	153705	154511	807	-1	potC	ABC-type spermidine/putrescine transport system, permease component II	K11070	COG1177	E	ABC-type spermidine/putrescine transport system, permease component II
224	CaPmal	YP_002004325	NC_011047	283	371011	371802	792	1	potC	ABC-type spermidine/putrescine transport system, permease protein II	K11070	COG1177	E	ABC-type spermidine/putrescine transport system, permease component II
224	PNWB_v1	c4020	Contig3A	2	1347	2138	792	-1	potC	ABC-type spermidine/putrescine transport system, permease component II	K11070	COG1177	E	ABC-type spermidine/putrescine transport system, permease component II
225	CaPastA	YP_456290	NC_007716	94	106612	107460	849	-1	potB	ABC-type spermidine/putrescine transport system, permease protein PotB	K11071	COG1176	E	ABC-type spermidine/putrescine transport system, permease component I
225	CaPastO	NP_950912	NC_005303	655	748135	748983	849	1	potB	ABC-type spermidine/putrescine transport system, permease component I	K11071	COG1176	E	ABC-type spermidine/putrescine transport system, permease component I
225	CaPaus	YP_001798812	NC_010544	102	154501	155337	837	-1	potB	ABC-type spermidine/putrescine transport system, permease component I	K11071	COG1176	E	ABC-type spermidine/putrescine transport system, permease component I
225	CaPmal	YP_002004324	NC_011047	282	370186	370989	804	1	potB	spermidine/putrescine ABC transporter permease I	K11071	COG1176	E	ABC-type spermidine/putrescine transport system, permease component I
225	PNWB_v1	c4030	Contig3A	3	2141	2983	843	-1	potB	ABC-type spermidine/putrescine transport system, permease component I	K11071	COG1176	E	ABC-type spermidine/putrescine transport system, permease component I
226	CaPastA	YP_456291	NC_007716	95	107454	108707	1254	-1	potA	ABC-type spermidine/putrescine transport, ATP-binding protein PotA	K11072	COG3842	E	ABC-type spermidine/putrescine transport systems, ATPase components
226	CaPastO	NP_950911	NC_005303	654	746888	748141	1254	1	potA	ABC-type spermidine/putrescine transport systems, ATPase component	K11072	COG3842	E	ABC-type spermidine/putrescine transport systems, ATPase components
226	CaPaus	YP_001798813	NC_010544	103	155334	156587	1254	-1	potA	ABC-type spermidine/putrescine transport systems, ATPase component	K11072	COG3842	E	ABC-type spermidine/putrescine transport systems, ATPase components
226	CaPmal	YP_002004323	NC_011047	281	368894	370186	1293	1	potA	ABC-type spermidine/putrescine transport, ATP-binding protein	K11072	COG3842	E	ABC-type spermidine/putrescine transport systems, ATPase components
226	PNWB_v1	c4040	Contig3A	4	2991	4292	1302	-1	potA	ABC-type spermidine/putrescine transport system, ATPase component	K11072	COG3842	E	ABC-type spermidine/putrescine transport systems, ATPase components
227	CaPastA	YP_456526	NC_007716	330	350050	351867	1818	1	lepA	GTP-binding protein LepA	K03596	COG0481	M	Membrane GTPase LepA
227	CaPastO	NP_950697	NC_005303	440	486559	488376	1818	1	lepA	hypothetical protein	K03596	COG0481	M	Membrane GTPase LepA
227	CaPaus	YP_001798888	NC_010544	178	262036	263853	1818	-1	lepA	GTP-binding protein LepA	K03596	COG0481	M	Membrane GTPase LepA
227	CaPmal	YP_002004322	NC_011047	280	366845	368662	1818	1	lepA	GTP-binding protein LepA	K03596	COG0481	M	Membrane GTPase LepA
227	PNWB_v1	c4050	Contig3A	5	4375	6192	1818	-1	lepA	GTP-binding protein LepA	K03596	COG0481	M	Membrane GTPase LepA
228	CaPastA	YP_456733	NC_007716	537	554442	555362	921	-1	NA	GTPase	K06949	COG1162	R	Predicted GTPases
228	CaPastO	NP_950434	NC_005303	182	215698	216618	921	1	NA	hypothetical protein	K06949	COG1162	R	Predicted GTPases
228	CaPaus	YP_001798971	NC_010544	261	363311	364243	933	-1	engC	GTPase EngC	K06949	COG1162	R	Predicted GTPases
228	CaPmal	YP_002004118	NC_011047	76	93847	94761	915	-1	engC	GTPase EngC	K06949	COG1162	R	Predicted GTPases
228	PNWB_v1	c4060	Contig3A	6	6602	7504	903	-1	engC	ribosome-associated GTPase	K06949	COG1162	R	Predicted GTPases
229	CaPastA	YP_456330	NC_007716	134	158330	160816	2487	1	pheT	phenylalanyl-tRNA synthetase subunit beta	K01890	COG0072	J	Phenylalanyl-tRNA synthetase beta subunit
229	CaPastO	NP_950850	NC_005303	594	674029	675957	1929	1	pheT	phenylalanyl-tRNA synthetase beta subunit	K01890	COG0072	J	Phenylalanyl-tRNA synthetase beta subunit
229	CaPaus	YP_001799116	NC_010544	406	527227	529656	2430	-1	pheT	Phenylalanyl-tRNA synthetase beta-chain	K01890	COG0072	J	Phenylalanyl-tRNA synthetase beta subunit
229	CaPmal	YP_002004119	NC_011047	77	94831	97242	2412	-1	pheT	phenylalanyl-tRNA synthetase subunit beta	K01890	COG0072	J	Phenylalanyl-tRNA synthetase beta subunit
229	PNWB_v1	c4070	Contig3A	7	7544	9967	2424	-1	pheT	phenylalanyl-tRNA synthetase subunit beta	K01890	COG0072	J	Phenylalanyl-tRNA synthetase beta subunit
230	CaPastA	YP_456329	NC_007716	133	157330	158361	1032	1	pheS	phenylalanyl-tRNA synthetase subunit alpha	K01889	COG0016	J	Phenylalanyl-tRNA synthetase alpha subunit
230	CaPastO	NP_950848	NC_005303	592	672491	673525	1035	1	pheS	phenylalanyl-tRNA synthetase alpha subunit	K01889	COG0016	J	Phenylalanyl-tRNA synthetase alpha subunit
230	CaPaus	YP_001799117	NC_010544	407	529643	530674	1032	-1	pheS	phenylalanyl-tRNA synthetase subunit alpha	K01889	COG0016	J	Phenylalanyl-tRNA synthetase alpha subunit
230	CaPmal	YP_002004120	NC_011047	78	97271	98296	1026	-1	pheS	phenylalanyl-tRNA synthetase subunit alpha	K01889	COG0016	J	Phenylalanyl-tRNA synthetase alpha subunit
230	PNWB_v1	c4080	Contig3A	8	10028	11068	1041	-1	pheS	phenylalanyl-tRNA synthetase subunit alpha	K01889	COG0016	J	Phenylalanyl-tRNA synthetase alpha subunit
231	CaPastA	YP_456207	NC_007716	11	11337	11927	591	1	engB	ribosome biogenesis GTP-binding protein YsxC	K03978	COG0218	R	Predicted GTPase
231	CaPastO	NP_950269	NC_005303	17	20275	20865	591	1	NA	hypothetical protein	K03978	COG0218	R	Predicted GTPase
231	CaPaus	YP_001798821	NC_010544	111	172021	172599	579	-1	engB	ribosome biogenesis GTP-binding protein YsxC	K03978	COG0218	R	Predicted GTPase
231	CaPmal	YP_002004142	NC_011047	100	136065	136655	591	-1	engB	ribosome biogenesis GTP-binding protein YsxC	K03978	COG0218	R	Predicted GTPase
231	PNWB_v1	c4090	Contig3A	9	11532	12128	597	1	engB	ribosome biogenesis GTP-binding protein YsxC	K03978	COG0218	R	Predicted GTPase
232	CaPastA	YP_456208	NC_007716	12	12105	14735	2631	1	valS	valyl-tRNA synthetase	K01873	COG0525	J	Valyl-tRNA synthetase
232	CaPastO	NP_950270	NC_005303	18	21671	23713	2043	1	valS	valyl-tRNA synthetase	K01873	COG0525	J	Valyl-tRNA synthetase
232	CaPaus	YP_001798820	NC_010544	110	169370	171940	2571	-1	valS	valyl-tRNA synthetase	K01873	COG0525	J	Valyl-tRNA synthetase
232	CaPmal	YP_002004369	NC_011047	327	420380	422971	2592	1	valS	Valyl-tRNA synthetase (ValRS)	K01873	COG0525	J	Valyl-tRNA synthetase
232	PNWB_v1	c4100	Contig3A	10	12263	14881	2619	1	valS	valyl-tRNA synthetase	K01873	COG0525	J	Valyl-tRNA synthetase
233	CaPastA	YP_456214	NC_007716	18	22660	25422	2763	-1	mgtA	cation transport ATPase	K01529	NA	X	NA
233	CaPastO	NP_950282	NC_005303	30	38845	41607	2763	-1	mgtA	cation transport ATPase	K01529	NA	X	NA
233	CaPaus	YP_001799338	NC_010544	628	799146	801887	2742	-1	mgtA	Cation transport ATPase	K01529	NA	X	NA
233	CaPmal	YP_002004256	NC_011047	214	293341	296097	2757	1	NA	cation transport ATPase	K01529	NA	X	NA
233	PNWB_v1	c4120	Contig3A	12	15833	18628	2796	1	mgtA3	cation transport ATPase	K01529	NA	X	NA
234	CaPastA	YP_456763	NC_007716	567	588636	589202	567	-1	pth	peptidyl-tRNA hydrolase	K01056	COG0193	J	Peptidyl-tRNA hydrolase
234	CaPastO	NP_950404	NC_005303	152	179034	179600	567	1	pth	peptidyl-tRNA hydrolase	K01056	COG0193	J	Peptidyl-tRNA hydrolase
234	CaPaus	YP_001799195	NC_010544	485	605383	605952	570	1	pth	peptidyl-tRNA hydrolase	K01056	COG0193	J	Peptidyl-tRNA hydrolase
234	CaPmal	YP_002004257	NC_011047	215	296154	296684	531	1	pth	peptidyl-tRNA hydrolase	K01056	COG0193	J	Peptidyl-tRNA hydrolase
234	PNWB_v1	c4130	Contig3A	13	18751	19338	588	1	pth	peptidyl-tRNA hydrolase	K01056	COG0193	J	Peptidyl-tRNA hydrolase
235	CaPastA	YP_456666	NC_007716	470	490475	492622	2148	-1	pnp	polynucleotide phosphorylase/polyadenylase	K00962	COG1185	J	Polyribonucleotide nucleotidyltransferase (polynucleotide phosphorylase)
235	CaPastO	NP_950503	NC_005303	250	284635	286782	2148	1	pnp	polyribonucleotide nucleotidyltransferase	K00962	COG1185	J	Polyribonucleotide nucleotidyltransferase (polynucleotide phosphorylase)
235	CaPaus	YP_001799249	NC_010544	539	675962	678094	2133	-1	pnp	polynucleotide phosphorylase/polyadenylase	K00962	COG1185	J	Polyribonucleotide nucleotidyltransferase (polynucleotide phosphorylase)
235	CaPmal	YP_002004412	NC_011047	370	455439	457625	2187	1	pnp	polynucleotide phosphorylase/polyadenylase	K00962	COG1185	J	Polyribonucleotide nucleotidyltransferase (polynucleotide phosphorylase)
235	PNWB_v1	c4150	Contig3A	14	24741	26915	2175	1	pnp	polynucleotide phosphorylase/polyadenylase	K00962	COG1185	J	Polyribonucleotide nucleotidyltransferase (polynucleotide phosphorylase)
236	CaPastA	YP_456324	NC_007716	128	151673	153163	1491	1	lysU	lysyl-tRNA synthetase	K04567	COG1190	J	Lysyl-tRNA synthetase (class II)
236	CaPastO	NP_950841	NC_005303	585	663083	664618	1536	1	lysU	lysyl-tRNA synthetase class II	K04567	COG1190	J	Lysyl-tRNA synthetase (class II)
236	CaPaus	YP_001799121	NC_010544	411	534950	536443	1494	-1	lysU	Lysyl-tRNA synthetase (class II)	K04567	COG1190	J	Lysyl-tRNA synthetase (class II)
236	CaPmal	YP_002004136	NC_011047	94	125686	127179	1494	1	lysU	lysyl-tRNA synthetase	K04567	COG1190	J	Lysyl-tRNA synthetase (class II)
236	PNWB_v1	c4180	Contig3A	15	30024	31502	1479	1	lysU	lysyl-tRNA synthetase	K04567	COG1190	J	Lysyl-tRNA synthetase (class II)
237	CaPastA	YP_456325	NC_007716	129	153277	156027	2751	1	dnaE	DNA polymerase III alpha subunit	K02337	COG0587	L	DNA polymerase III, alpha subunit
237	CaPastO	NP_950843	NC_005303	587	665511	667388	1878	1	dnaE	DNA polymerase III alpha subunit	K02337	COG0587	L	DNA polymerase III, alpha subunit
237	CaPaus	YP_001799120	NC_010544	410	532172	534928	2757	-1	dnaE	DNA polymerase III alpha subunit	K02337	COG0587	L	DNA polymerase III, alpha subunit
237	CaPmal	YP_002004137	NC_011047	95	127224	129986	2763	1	dnaE	DNA polymerase III subunit alpha	K02337	COG0587	L	DNA polymerase III, alpha subunit
237	PNWB_v1	c4200	Contig3A	17	32079	34808	2730	1	dnaE	DNA polymerase III subunit alpha (DnaE)	K02337	COG0587	L	DNA polymerase III, alpha subunit
238	CaPastA	YP_456826	NC_007716	630	655668	656633	966	-1	NA	hypothetical protein	K07146	COG1054	R	Predicted sulfurtransferase
238	CaPastO	NP_950337	NC_005303	85	108383	109348	966	1	NA	hypothetical protein	K07146	COG1054	R	Predicted sulfurtransferase
238	CaPaus	YP_001799180	NC_010544	470	588765	589685	921	-1	NA	hypothetical protein	K07146	COG1054	R	Predicted sulfurtransferase
238	CaPmal	YP_002004318	NC_011047	276	363007	363939	933	-1	NA	hypothetical protein	K07146	COG1054	R	Predicted sulfurtransferase
238	PNWB_v1	c4240	Contig3A	21	37316	38260	945	1	NA	rhodanese-related sulfurtransferase	K07146	COG1054	R	Predicted sulfurtransferase
239	CaPastA	YP_456825	NC_007716	629	655174	655482	309	-1	rplU	50S ribosomal protein L21	K02888	COG0261	J	Ribosomal protein L21
239	CaPastO	NP_950338	NC_005303	86	109503	109838	336	1	rplU	ribosomal protein L21	K02888	COG0261	J	Ribosomal protein L21
239	CaPaus	YP_001799179	NC_010544	469	588327	588635	309	-1	rplU	50S ribosomal protein L21	K02888	COG0261	J	Ribosomal protein L21
239	CaPmal	YP_002004317	NC_011047	275	362669	362977	309	-1	rplU	50S ribosomal protein L21	K02888	COG0261	J	Ribosomal protein L21
239	PNWB_v1	c4250	Contig3A	22	38388	38714	327	1	rplU	50S ribosomal protein L21	K02888	COG0261	J	Ribosomal protein L21
240	CaPastA	YP_456824	NC_007716	628	654833	655168	336	-1	NA	hypothetical protein	K07584	COG2868	J	Predicted ribosomal protein
240	CaPastO	NP_950339	NC_005303	87	109844	110179	336	1	NA	hypothetical protein	K07584	COG2868	J	Predicted ribosomal protein
240	CaPaus	YP_001799178	NC_010544	468	587991	588317	327	-1	NA	hypothetical protein	K07584	COG2868	J	Predicted ribosomal protein
240	CaPmal	YP_002004316	NC_011047	274	362338	362655	318	-1	NA	hypothetical protein	K07584	COG2868	J	Predicted ribosomal protein
240	PNWB_v1	c4260	Contig3A	23	38727	39047	321	1	ysxB	putative ribosomal protein	K07584	COG2868	J	Predicted ribosomal protein
241	CaPastA	YP_456823	NC_007716	627	654553	654831	279	-1	rpmA	50S ribosomal protein L27	K02899	COG0211	J	Ribosomal protein L27
241	CaPastO	NP_950340	NC_005303	88	110181	110459	279	1	rpmA	ribosomal protein L27	K02899	COG0211	J	Ribosomal protein L27
241	CaPaus	YP_001799177	NC_010544	467	587705	587986	282	-1	rpmA	50S ribosomal protein L27	K02899	COG0211	J	Ribosomal protein L27
241	CaPmal	YP_002004315	NC_011047	273	362022	362312	291	-1	rpmA	50S ribosomal protein L27	K02899	COG0211	J	Ribosomal protein L27
241	PNWB_v1	c4270	Contig3A	24	39063	39362	300	1	rpmA	50S ribosomal protein L27	K02899	COG0211	J	Ribosomal protein L27
242	CaPastA	YP_456822	NC_007716	626	653257	654516	1260	-1	obgE	GTPase ObgE	K03979	COG0536	R	Predicted GTPase
242	CaPastO	NP_950341	NC_005303	89	110486	111754	1269	1	obg	hypothetical protein	K03979	COG0536	R	Predicted GTPase
242	CaPaus	YP_001799176	NC_010544	466	586416	587681	1266	-1	obgE	GTPase ObgE	K03979	COG0536	R	Predicted GTPase
242	CaPmal	YP_002004314	NC_011047	272	360691	361956	1266	-1	obgE	GTPase ObgE	K03979	COG0536	R	Predicted GTPase
242	PNWB_v1	c4280	Contig3A	25	39709	40992	1284	1	obgE	GTPase ObgE	K03979	COG0536	R	Predicted GTPase
243	CaPastA	YP_456437	NC_007716	241	248691	249287	597	1	rpsD	30S ribosomal protein S4	K02986	COG0522	J	Ribosomal protein S4 and related proteins
243	CaPastO	NP_950838	NC_005303	582	657945	658394	450	-1	rpsD	ribosomal protein S4 and related protein	K02986	COG0522	J	Ribosomal protein S4 and related proteins
243	CaPaus	YP_001798771	NC_010544	61	95524	96120	597	1	rpsD	30S ribosomal protein S4	K02986	COG0522	J	Ribosomal protein S4 and related proteins
243	CaPmal	YP_002004343	NC_011047	301	389507	390106	600	1	rpsD	30S ribosomal protein S4	K02986	COG0522	J	Ribosomal protein S4 and related proteins
243	PNWB_v1	c4320	Contig3A	28	42915	43520	606	1	rpsD	30S ribosomal protein S4	K02986	COG0522	J	Ribosomal protein S4 and related proteins
244	CaPastA	YP_456438	NC_007716	242	249650	252328	2679	1	mgtB	Mg(2+) transport ATPase, P-type	K01531	COG0474	P	Cation transport ATPase
244	CaPastO	NP_950837	NC_005303	581	654894	657572	2679	-1	mgtA	cation transport ATPase	K01531	COG0474	P	Cation transport ATPase
244	CaPaus	YP_001798772	NC_010544	62	96454	99102	2649	1	mgtA	Cation transport P-ATPase	K01531	COG0474	P	Cation transport ATPase
244	CaPmal	YP_002004344	NC_011047	302	390295	392958	2664	1	NA	cation transport P-ATPase	K01531	COG0474	P	Cation transport ATPase
244	PNWB_v1	c4340	Contig3A	30	43865	46309	2445	1	mgtB	Mg(2+) transport ATPase, P-type	K01531	COG0474	P	Cation transport ATPase
245	CaPastA	YP_456439	NC_007716	243	252506	253297	792	1	NA	hypothetical protein	NA	NA	X	NA
245	CaPastO	NP_950836	NC_005303	580	653913	654704	792	-1	NA	hypothetical protein	NA	NA	X	NA
245	CaPaus	YP_001798773	NC_010544	63	99142	99885	744	1	NA	hypothetical protein	NA	NA	X	NA
245	CaPmal	YP_002004345	NC_011047	303	393024	393785	762	1	NA	hypothetical protein	NA	NA	X	NA
245	PNWB_v1	c4350	Contig3A	31	46349	47128	780	1	NA	hypothetical protein	NA	NA	X	NA
246	CaPastA	YP_456853	NC_007716	657	688200	688430	231	-1	acpP	acyl carrier protein	K02078	COG0236	IQ	Acyl carrier protein
246	CaPastO	NP_950991	NC_005303	734	835430	835660	231	-1	acpP	acyl carrier protein	K02078	COG0236	IQ	Acyl carrier protein
246	CaPaus	YP_001798782	NC_010544	72	109106	109336	231	1	acpP	Acyl carrier protein (ACP)	K02078	COG0236	IQ	Acyl carrier protein
246	CaPmal	YP_002004473	NC_011047	431	530765	531019	255	1	acpP	Acyl carrier protein (ACP)	K02078	COG0236	IQ	Acyl carrier protein
246	PNWB_v1	c4360	Contig3A	32	47435	47710	276	1	acpP	acyl carrier protein	K02078	COG0236	IQ	Acyl carrier protein
247	CaPastA	YP_456852	NC_007716	656	685641	688106	2466	-1	leuS	leucyl-tRNA synthetase	K01869	COG0495	J	Leucyl-tRNA synthetase
247	CaPastO	NP_950990	NC_005303	733	832861	835326	2466	-1	leuS	leucyl-tRNA synthetase	K01869	COG0495	J	Leucyl-tRNA synthetase
247	CaPaus	YP_001798783	NC_010544	73	112526	114970	2445	1	leuS	leucyl-tRNA synthetase	K01869	COG0495	J	Leucyl-tRNA synthetase
247	CaPmal	YP_002004474	NC_011047	432	531044	533479	2436	1	leuS	leucyl-tRNA synthetase	K01869	COG0495	J	Leucyl-tRNA synthetase
247	PNWB_v1	c4370	Contig3A	33	47722	50175	2454	1	leuS	leucyl-tRNA synthetase	K01869	COG0495	J	Leucyl-tRNA synthetase
248	CaPastA	YP_456851	NC_007716	655	684853	685488	636	-1	gmk	guanylate kinase	K00942	COG0194	F	Guanylate kinase
248	CaPastO	NP_950989	NC_005303	732	832072	832710	639	-1	gmk	guanylate kinase	K00942	COG0194	F	Guanylate kinase
248	CaPaus	YP_001798784	NC_010544	74	115074	115712	639	1	gmk	guanylate kinase	K00942	COG0194	F	Guanylate kinase
248	CaPmal	YP_002004475	NC_011047	433	533544	534176	633	1	gmk	guanylate kinase	K00942	COG0194	F	Guanylate kinase
248	PNWB_v1	c4380	Contig3A	34	50232	50882	651	1	gmk	guanylate kinase	K00942	COG0194	F	Guanylate kinase
249	CaPastA	YP_456848	NC_007716	652	683547	684155	609	-1	NA	hypothetical protein	K03438	COG0275	M	Predicted S-adenosylmethionine-dependent methyltransferase involved in cell envelope biogenesis
249	CaPastO	NP_950987	NC_005303	730	830761	831789	1029	-1	NA	hypothetical protein	K03438	COG0275	M	Predicted S-adenosylmethionine-dependent methyltransferase involved in cell envelope biogenesis
249	CaPaus	YP_001798786	NC_010544	76	116012	116923	912	1	mraW	S-adenosyl-methyltransferase MraW	K03438	COG0275	M	Predicted S-adenosylmethionine-dependent methyltransferase involved in cell envelope biogenesis
249	CaPmal	YP_002004477	NC_011047	435	534424	535326	903	1	mraW	S-adenosyl-methyltransferase MraW	K03438	COG0275	M	Predicted S-adenosylmethionine-dependent methyltransferase involved in cell envelope biogenesis
249	PNWB_v1	c4400	Contig3A	36	51180	51779	600	1	mraW	S-adenosyl-methyltransferase	K03438	COG0275	M	Predicted S-adenosylmethionine-dependent methyltransferase involved in cell envelope biogenesis
250	CaPastA	YP_456720	NC_007716	524	532772	533089	318	-1	rpsJ	30S ribosomal protein S10	K02946	COG0051	J	Ribosomal protein S10
250	CaPastO	NP_950451	NC_005303	199	242717	243040	324	1	rpsJ	ribosomal protein S10	K02946	COG0051	J	Ribosomal protein S10
250	CaPaus	YP_001799173	NC_010544	463	584169	584486	318	-1	rpsJ	30S ribosomal protein S10	K02946	COG0051	J	Ribosomal protein S10
250	CaPmal	YP_002004371	NC_011047	329	424015	424329	315	1	rpsJ	30S ribosomal protein S10	K02946	COG0051	J	Ribosomal protein S10
250	PNWB_v1	c4440	Contig3B	1	1678	1992	315	1	rpsJ	30S ribosomal protein S10	K02946	COG0051	J	Ribosomal protein S10
251	CaPastA	YP_456718	NC_007716	522	531926	532591	666	-1	rplC	50S ribosomal protein L3	K02906	COG0087	J	Ribosomal protein L3
251	CaPastO	NP_950452	NC_005303	200	243429	243902	474	1	rplC	ribosomal protein L3	K02906	COG0087	J	Ribosomal protein L3
251	CaPaus	YP_001799172	NC_010544	462	583458	584123	666	-1	rplC	50S ribosomal protein L3	K02906	COG0087	J	Ribosomal protein L3
251	CaPmal	YP_002004372	NC_011047	330	424380	425039	660	1	rplC	50S ribosomal protein L3	K02906	COG0087	J	Ribosomal protein L3
251	PNWB_v1	c4450	Contig3B	2	2090	2755	666	1	rplC	50S ribosomal protein L3	K02906	COG0087	J	Ribosomal protein L3
252	CaPastA	YP_456717	NC_007716	521	531316	531939	624	-1	rplD	50S ribosomal protein L4	K02926	COG0088	J	Ribosomal protein L4
252	CaPastO	NP_950453	NC_005303	201	243889	244512	624	1	rplD	ribosomal protein L4	K02926	COG0088	J	Ribosomal protein L4
252	CaPaus	YP_001799171	NC_010544	461	582848	583471	624	-1	rplD	50S ribosomal protein L4	K02926	COG0088	J	Ribosomal protein L4
252	CaPmal	YP_002004373	NC_011047	331	425032	425655	624	1	rplD	50S ribosomal protein L4	K02926	COG0088	J	Ribosomal protein L4
252	PNWB_v1	c4460	Contig3B	3	2748	3383	636	1	rplD	50S ribosomal protein L4	K02926	COG0088	J	Ribosomal protein L4
253	CaPastA	YP_456716	NC_007716	520	531026	531316	291	-1	rplW	50S ribosomal protein L23	K02892	COG0089	J	Ribosomal protein L23
253	CaPastO	NP_950454	NC_005303	202	244512	244802	291	1	rplW	ribosomal protein L23	K02892	COG0089	J	Ribosomal protein L23
253	CaPaus	YP_001799170	NC_010544	460	582561	582845	285	-1	rplW	50S ribosomal protein L23	K02892	COG0089	J	Ribosomal protein L23
253	CaPmal	YP_002004374	NC_011047	332	425655	425939	285	1	rplW	50S ribosomal protein L23	K02892	COG0089	J	Ribosomal protein L23
253	PNWB_v1	c4470	Contig3B	4	3376	3669	294	1	rplW	50S ribosomal protein L23	K02892	COG0089	J	Ribosomal protein L23
254	CaPastA	YP_456715	NC_007716	519	530138	530968	831	-1	rplB	50S ribosomal protein L2	K02886	COG0090	J	Ribosomal protein L2
254	CaPastO	NP_950455	NC_005303	203	244862	245692	831	1	rplB	ribosomal protein L2	K02886	COG0090	J	Ribosomal protein L2
254	CaPaus	YP_001799169	NC_010544	459	581707	582537	831	-1	rplB	50S ribosomal protein L2	K02886	COG0090	J	Ribosomal protein L2
254	CaPmal	YP_002004375	NC_011047	333	426015	426857	843	1	rplB	50S ribosomal protein L2	K02886	COG0090	J	Ribosomal protein L2
254	PNWB_v1	c4480	Contig3B	5	3761	4591	831	1	rplB	50S ribosomal protein L2	K02886	COG0090	J	Ribosomal protein L2
255	CaPastA	YP_456714	NC_007716	518	529844	530125	282	-1	rpsS	30S ribosomal protein S19	K02965	COG0185	J	Ribosomal protein S19
255	CaPastO	NP_950456	NC_005303	204	245705	245986	282	1	rpsS	ribosomal protein S19	K02965	COG0185	J	Ribosomal protein S19
255	CaPaus	YP_001799168	NC_010544	458	581412	581693	282	-1	rpsS	30S ribosomal protein S19	K02965	COG0185	J	Ribosomal protein S19
255	CaPmal	YP_002004376	NC_011047	334	426873	427154	282	1	rpsS	30S ribosomal protein S19	K02965	COG0185	J	Ribosomal protein S19
255	PNWB_v1	c4490	Contig3B	6	4609	4890	282	1	rpsS	30S ribosomal protein S19	K02965	COG0185	J	Ribosomal protein S19
256	CaPastA	YP_456713	NC_007716	517	529434	529823	390	-1	rplV	50S ribosomal protein L22	K02890	COG0091	J	Ribosomal protein L22
256	CaPastO	NP_950457	NC_005303	205	246003	246392	390	1	rplV	ribosomal protein L22	K02890	COG0091	J	Ribosomal protein L22
256	CaPaus	YP_001799167	NC_010544	457	581023	581391	369	-1	rplV	50S ribosomal protein L22	K02890	COG0091	J	Ribosomal protein L22
256	CaPmal	YP_002004377	NC_011047	335	427172	427567	396	1	rplV	50S ribosomal protein L22	K02890	COG0091	J	Ribosomal protein L22
256	PNWB_v1	c4500	Contig3B	7	4920	5306	387	1	rplV	50S ribosomal protein L22	K02890	COG0091	J	Ribosomal protein L22
257	CaPastA	YP_456712	NC_007716	516	528692	529450	759	-1	rpsC	30S ribosomal protein S3	K02982	COG0092	J	Ribosomal protein S3
257	CaPastO	NP_950458	NC_005303	206	246376	247134	759	1	rpsC	ribosomal protein S3	K02982	COG0092	J	Ribosomal protein S3
257	CaPaus	YP_001799166	NC_010544	456	580287	581039	753	-1	rpsC	30S ribosomal protein S3	K02982	COG0092	J	Ribosomal protein S3
257	CaPmal	YP_002004378	NC_011047	336	427551	428288	738	1	rpsC	30S ribosomal protein S3	K02982	COG0092	J	Ribosomal protein S3
257	PNWB_v1	c4510	Contig3B	8	5290	6009	720	1	rpsC	30S ribosomal protein S3	K02982	COG0092	J	Ribosomal protein S3
258	CaPastA	YP_456711	NC_007716	515	528292	528714	423	-1	rplP	50S ribosomal protein L16	K02878	COG0197	J	Ribosomal protein L16/L10E
258	CaPastO	NP_950459	NC_005303	207	247112	247534	423	1	rplP	ribosomal protein L16/L10E	K02878	COG0197	J	Ribosomal protein L16/L10E
258	CaPaus	YP_001799165	NC_010544	455	579887	580309	423	-1	rplP	50S ribosomal protein L16	K02878	COG0197	J	Ribosomal protein L16/L10E
258	CaPmal	YP_002004379	NC_011047	337	428291	428713	423	1	rplP	50S ribosomal protein L16	K02878	COG0197	J	Ribosomal protein L16/L10E
258	PNWB_v1	c4520	Contig3B	9	6078	6497	420	1	rplP	50S ribosomal protein L16	K02878	COG0197	J	Ribosomal protein L16/L10E
259	CaPastA	YP_456709	NC_007716	513	527709	527972	264	-1	rpsQ	30S ribosomal protein S17	K02961	COG0186	J	Ribosomal protein S17
259	CaPastO	NP_950461	NC_005303	209	247851	248114	264	1	rpsQ	ribosomal protein S17	K02961	COG0186	J	Ribosomal protein S17
259	CaPaus	YP_001799163	NC_010544	453	579279	579566	288	-1	rpsQ	30S ribosomal protein S17	K02961	COG0186	J	Ribosomal protein S17
259	CaPmal	YP_002004381	NC_011047	339	429060	429329	270	1	rpsQ	30S ribosomal protein S17	K02961	COG0186	J	Ribosomal protein S17
259	PNWB_v1	c4540	Contig3B	11	7137	7403	267	1	rpsQ	30S ribosomal protein S17	K02961	COG0186	J	Ribosomal protein S17
260	CaPastA	YP_456708	NC_007716	512	527334	527696	363	-1	rplN	50S ribosomal protein L14	K02874	COG0093	J	Ribosomal protein L14
260	CaPastO	NP_950462	NC_005303	210	248127	248489	363	1	rplN	ribosomal protein L14	K02874	COG0093	J	Ribosomal protein L14
260	CaPaus	YP_001799162	NC_010544	452	578920	579282	363	-1	rplN	50S ribosomal protein L14	K02874	COG0093	J	Ribosomal protein L14
260	CaPmal	YP_002004382	NC_011047	340	429326	429694	369	1	rplN	50S ribosomal protein L14	K02874	COG0093	J	Ribosomal protein L14
260	PNWB_v1	c4550	Contig3B	12	7400	7780	381	1	rplN	50S ribosomal protein L14	K02874	COG0093	J	Ribosomal protein L14
261	CaPastA	YP_456707	NC_007716	511	526973	527320	348	-1	rplX	50S ribosomal protein L24	K02895	COG0198	J	Ribosomal protein L24
261	CaPastO	NP_950463	NC_005303	211	248611	248850	240	1	rplX	ribosomal protein L24	K02895	COG0198	J	Ribosomal protein L24
261	CaPaus	YP_001799161	NC_010544	451	578561	578908	348	-1	rplX	50S ribosomal protein L24	K02895	COG0198	J	Ribosomal protein L24
261	CaPmal	YP_002004383	NC_011047	341	429712	430059	348	1	rplX	50S ribosomal protein L24	K02895	COG0198	J	Ribosomal protein L24
261	PNWB_v1	c4560	Contig3B	13	7791	8138	348	1	rplX	50S ribosomal protein L24	K02895	COG0198	J	Ribosomal protein L24
262	CaPastA	YP_456706	NC_007716	510	526412	526957	546	-1	rplE	50S ribosomal protein L5	K02931	COG0094	J	Ribosomal protein L5
262	CaPastO	NP_950464	NC_005303	212	248866	249411	546	1	rplE	ribosomal protein L5	K02931	COG0094	J	Ribosomal protein L5
262	CaPaus	YP_001799160	NC_010544	450	577998	578546	549	-1	rplE	50S ribosomal protein L5	K02931	COG0094	J	Ribosomal protein L5
262	CaPmal	YP_002004384	NC_011047	342	430076	430612	537	1	rplE	50S ribosomal protein L5	K02931	COG0094	J	Ribosomal protein L5
262	PNWB_v1	c4570	Contig3B	14	8159	8710	552	1	rplE	50S ribosomal protein L5	K02931	COG0094	J	Ribosomal protein L5
263	CaPastA	YP_456705	NC_007716	509	526128	526397	270	-1	rpsN	30S ribosomal protein S14	K02954	COG0199	J	Ribosomal protein S14
263	CaPastO	NP_950465	NC_005303	213	249426	249695	270	1	rpsN	ribosomal protein S14	K02954	COG0199	J	Ribosomal protein S14
263	CaPaus	YP_001799159	NC_010544	449	577714	577983	270	-1	rpsN	30S ribosomal protein S14	K02954	COG0199	J	Ribosomal protein S14
263	CaPmal	YP_002004385	NC_011047	343	430627	430896	270	1	rpsN	30S ribosomal protein S14	K02954	COG0199	J	Ribosomal protein S14
263	PNWB_v1	c4580	Contig3B	15	8729	8998	270	1	rpsN	30S ribosomal protein S14	K02954	COG0199	J	Ribosomal protein S14
264	CaPastA	YP_456704	NC_007716	508	525714	526106	393	-1	rpsH	30S ribosomal protein S8	K02994	COG0096	J	Ribosomal protein S8
264	CaPastO	NP_950466	NC_005303	214	249717	250109	393	1	rpsH	ribosomal protein S8	K02994	COG0096	J	Ribosomal protein S8
264	CaPaus	YP_001799158	NC_010544	448	577305	577697	393	-1	rpsH	30S ribosomal protein S8	K02994	COG0096	J	Ribosomal protein S8
264	CaPmal	YP_002004386	NC_011047	344	430921	431313	393	1	rpsH	30S ribosomal protein S8	K02994	COG0096	J	Ribosomal protein S8
264	PNWB_v1	c4590	Contig3B	16	9027	9407	381	1	rpsH	30S ribosomal protein S8	K02994	COG0096	J	Ribosomal protein S8
265	CaPastA	YP_456703	NC_007716	507	525113	525667	555	-1	rplF	50S ribosomal protein L6	K02933	COG0097	J	Ribosomal protein L6P/L9E
265	CaPastO	NP_950467	NC_005303	215	250156	250710	555	1	rplF	ribosomal protein L6	K02933	COG0097	J	Ribosomal protein L6P/L9E
265	CaPaus	YP_001799157	NC_010544	447	576723	577274	552	-1	rplF	50S ribosomal protein L6	K02933	COG0097	J	Ribosomal protein L6P/L9E
265	CaPmal	YP_002004387	NC_011047	345	431330	431875	546	1	rplF	50S ribosomal protein L6	K02933	COG0097	J	Ribosomal protein L6P/L9E
265	PNWB_v1	c4600	Contig3B	17	9433	9978	546	1	rplF	50S ribosomal protein L6	K02933	COG0097	J	Ribosomal protein L6P/L9E
266	CaPastA	YP_456702	NC_007716	506	524750	525103	354	-1	rplR	50S ribosomal protein L18	K02881	COG0256	J	Ribosomal protein L18
266	CaPastO	NP_950468	NC_005303	216	250720	251073	354	1	rplR	ribosomal protein L18	K02881	COG0256	J	Ribosomal protein L18
266	CaPaus	YP_001799156	NC_010544	446	576360	576713	354	-1	rplR	50S ribosomal protein L18	K02881	COG0256	J	Ribosomal protein L18
266	CaPmal	YP_002004388	NC_011047	346	431897	432250	354	1	rplR	50S ribosomal protein L18	K02881	COG0256	J	Ribosomal protein L18
266	PNWB_v1	c4610	Contig3B	18	9999	10352	354	1	rplR	50S ribosomal protein L18	K02881	COG0256	J	Ribosomal protein L18
267	CaPastA	YP_456701	NC_007716	505	524220	524777	558	-1	rpsE	30S ribosomal protein S5	K02988	COG0098	J	Ribosomal protein S5
267	CaPastO	NP_950469	NC_005303	217	251088	251603	516	1	rpsE	ribosomal protein S5	K02988	COG0098	J	Ribosomal protein S5
267	CaPaus	YP_001799155	NC_010544	445	575821	576336	516	-1	rpsE	30S ribosomal protein S5	K02988	COG0098	J	Ribosomal protein S5
267	CaPmal	YP_002004389	NC_011047	347	432262	432768	507	1	rpsE	30S ribosomal protein S5	K02988	COG0098	J	Ribosomal protein S5
267	PNWB_v1	c4620	Contig3B	19	10389	10913	525	1	rpsE	30S ribosomal protein S5	K02988	COG0098	J	Ribosomal protein S5
268	CaPastA	YP_456699	NC_007716	503	523589	524026	438	-1	rplO	50S ribosomal protein L15	K02876	COG0200	J	Ribosomal protein L15
268	CaPastO	NP_950471	NC_005303	219	251855	252235	381	1	rplO	ribosomal protein L15	K02876	COG0200	J	Ribosomal protein L15
268	CaPaus	YP_001799153	NC_010544	443	575190	575627	438	-1	rplO	50S ribosomal protein L15	K02876	COG0200	J	Ribosomal protein L15
268	CaPmal	YP_002004391	NC_011047	349	432976	433416	441	1	rplO	50S ribosomal protein L15	K02876	COG0200	J	Ribosomal protein L15
268	PNWB_v1	c4640	Contig3B	21	11144	11581	438	1	rplO	50S ribosomal protein L15	K02876	COG0200	J	Ribosomal protein L15
269	CaPastA	YP_456698	NC_007716	502	522345	523586	1242	-1	secY	preprotein translocase subunit SecY	K03076	COG0201	U	Preprotein translocase subunit SecY
269	CaPastO	NP_950472	NC_005303	220	252238	253479	1242	1	secY	preprotein translocase subunit SecY	K03076	COG0201	U	Preprotein translocase subunit SecY
269	CaPaus	YP_001799152	NC_010544	442	573941	575188	1248	-1	secY	preprotein translocase subunit SecY	K03076	COG0201	U	Preprotein translocase subunit SecY
269	CaPmal	YP_002004392	NC_011047	350	433420	434664	1245	1	secY	preprotein translocase subunit SecY	K03076	COG0201	U	Preprotein translocase subunit SecY
269	PNWB_v1	c4650	Contig3B	22	11607	12869	1263	1	secY	preprotein translocase subunit SecY	K03076	COG0201	U	Preprotein translocase subunit SecY
270	CaPastA	YP_456696	NC_007716	500	520933	521676	744	-1	map	methionine aminopeptidase	K01265	COG0024	J	Methionine aminopeptidase
270	CaPastO	NP_950474	NC_005303	222	254148	254891	744	1	map	methionine aminopeptidase	K01265	COG0024	J	Methionine aminopeptidase
270	CaPaus	YP_001799150	NC_010544	440	572526	573269	744	-1	map	Methionine aminopeptidase (MAP)	K01265	COG0024	J	Methionine aminopeptidase
270	CaPmal	YP_002004393	NC_011047	351	434715	435461	747	1	map	methionine aminopeptidase (MAP)	K01265	COG0024	J	Methionine aminopeptidase
270	PNWB_v1	c4660	Contig3B	23	12949	13695	747	1	map	methionine aminopeptidase	K01265	COG0024	J	Methionine aminopeptidase
271	CaPastA	YP_456695	NC_007716	499	520617	520853	237	-1	infA	translation initiation factor IF-1	K02518	COG0361	J	Translation initiation factor 1 (IF-1)
271	CaPastO	NP_950475	NC_005303	223	254967	255203	237	1	infA	translation initiation factor IF-1	K02518	COG0361	J	Translation initiation factor 1 (IF-1)
271	CaPaus	YP_001799149	NC_010544	439	572273	572491	219	-1	infA	translation initiation factor IF-1	K02518	COG0361	J	Translation initiation factor 1 (IF-1)
271	CaPmal	YP_002004394	NC_011047	352	435491	435730	240	1	infA	translation initiation factor IF-1	K02518	COG0361	J	Translation initiation factor 1 (IF-1)
271	PNWB_v1	c4670	Contig3B	24	13727	13939	213	1	infA	translation initiation factor IF-1	K02518	COG0361	J	Translation initiation factor 1 (IF-1)
272	CaPastA	YP_456694	NC_007716	498	520488	520604	117	-1	rpmJ	50S ribosomal protein L36	K02919	COG0257	J	Ribosomal protein L36
272	CaPastO	NP_950476	NC_005303	224	255216	255332	117	1	rpmJ	ribosomal protein L36	K02919	COG0257	J	Ribosomal protein L36
272	CaPaus	YP_001799148	NC_010544	438	572145	572261	117	-1	rpmJ	50S ribosomal protein L36	K02919	COG0257	J	Ribosomal protein L36
272	CaPmal	YP_002004395	NC_011047	353	435768	435884	117	1	rpmJ	50S ribosomal protein L36	K02919	COG0257	J	Ribosomal protein L36
272	PNWB_v1	c4680	Contig3B	25	13967	14083	117	1	rpmJ	50S ribosomal protein L36	K02919	COG0257	J	Ribosomal protein L36
273	CaPastA	YP_456693	NC_007716	497	520095	520475	381	-1	rpsM	30S ribosomal protein S13	K02952	COG0099	J	Ribosomal protein S13
273	CaPastO	NP_950477	NC_005303	225	255345	255710	366	1	rpsM	ribosomal protein S13	K02952	COG0099	J	Ribosomal protein S13
273	CaPaus	YP_001799147	NC_010544	437	571767	572132	366	-1	rpsM	30S ribosomal protein S13	K02952	COG0099	J	Ribosomal protein S13
273	CaPmal	YP_002004396	NC_011047	354	435902	436285	384	1	rpsM	30S ribosomal protein S13	K02952	COG0099	J	Ribosomal protein S13
273	PNWB_v1	c4690	Contig3B	26	14106	14501	396	1	rpsM	30S ribosomal protein S13	K02952	COG0099	J	Ribosomal protein S13
274	CaPastA	YP_456692	NC_007716	496	519681	520067	387	-1	rpsK	30S ribosomal protein S11	K02948	COG0100	J	Ribosomal protein S11
274	CaPastO	NP_950478	NC_005303	226	255752	256138	387	1	rpsK	ribosomal protein S11	K02948	COG0100	J	Ribosomal protein S11
274	CaPaus	YP_001799146	NC_010544	436	571365	571751	387	-1	rpsK	30S ribosomal protein S11	K02948	COG0100	J	Ribosomal protein S11
274	CaPmal	YP_002004397	NC_011047	355	436299	436691	393	1	rpsK	30S ribosomal protein S11	K02948	COG0100	J	Ribosomal protein S11
274	PNWB_v1	c4700	Contig3B	27	14510	14902	393	1	rpsK	30S ribosomal protein S11	K02948	COG0100	J	Ribosomal protein S11
275	CaPastA	YP_456691	NC_007716	495	518658	519650	993	-1	rpoA	DNA-directed RNA polymerase subunit alpha	K03040	COG0202	K	DNA-directed RNA polymerase, alpha subunit/40 kD subunit
275	CaPastO	NP_950479	NC_005303	227	256169	256912	744	1	rpoA	DNA-directed RNA polymerase alpha subunit	K03040	COG0202	K	DNA-directed RNA polymerase, alpha subunit/40 kD subunit
275	CaPaus	YP_001799145	NC_010544	435	570344	571336	993	-1	rpoA	DNA-directed RNA polymerase subunit alpha	K03040	COG0202	K	DNA-directed RNA polymerase, alpha subunit/40 kD subunit
275	CaPmal	YP_002004398	NC_011047	356	436706	437701	996	1	rpoA	DNA-directed RNA polymerase subunit alpha	K03040	COG0202	K	DNA-directed RNA polymerase, alpha subunit/40 kD subunit
275	PNWB_v1	c4710	Contig3B	28	14917	15882	966	1	rpoA	DNA-directed RNA polymerase subunit alpha	K03040	COG0202	K	DNA-directed RNA polymerase, alpha subunit/40 kD subunit
276	CaPastA	YP_456690	NC_007716	494	518258	518614	357	-1	rplQ	50S ribosomal protein L17	K02879	COG0203	J	Ribosomal protein L17
276	CaPastO	NP_950480	NC_005303	228	257206	257562	357	1	rplQ	ribosomal protein L17	K02879	COG0203	J	Ribosomal protein L17
276	CaPaus	YP_001799144	NC_010544	434	569970	570326	357	-1	rplQ	50S ribosomal protein L17	K02879	COG0203	J	Ribosomal protein L17
276	CaPmal	YP_002004399	NC_011047	357	437708	438064	357	1	rplQ	50S ribosomal protein L17	K02879	COG0203	J	Ribosomal protein L17
276	PNWB_v1	c4720	Contig3B	29	15921	16277	357	1	rplQ	50S ribosomal protein L17	K02879	COG0203	J	Ribosomal protein L17
277	CaPastA	YP_456737	NC_007716	541	559086	559955	870	-1	cbiO	cobalt transport ATP-binding protein cbiO	K02006	COG1122	P	ABC-type cobalt transport system, ATPase component
277	CaPastO	NP_950431	NC_005303	179	211167	211982	816	1	cbiO	ABC-type cobalt transport system, ATPase	K02006	COG1122	P	ABC-type cobalt transport system, ATPase component
277	CaPaus	YP_001798853	NC_010544	143	212141	212947	807	-1	cbiO2	ABC-type cobalt import ATP-binding protein cbiO 2	K02006	COG1122	P	ABC-type cobalt transport system, ATPase component
277	CaPmal	YP_002004400	NC_011047	358	438369	439193	825	1	cbiO2	cobalt import ATP-binding protein cbiO 2	K02006	COG1122	P	ABC-type cobalt transport system, ATPase component
277	PNWB_v1	c4730	Contig3B	30	16392	17213	822	1	cbiO2	ABC-type cobalt transport system, ATPase component	K02006	COG1122	P	ABC-type cobalt transport system, ATPase component
278	CaPastA	YP_456735	NC_007716	539	557194	558240	1047	-1	cbiQ	ABC-type cobalt transport protein CbiQ	K02008	COG0619	P	ABC-type cobalt transport system, permease component CbiQ and related transporters
278	CaPastO	NP_950432	NC_005303	180	212828	213877	1050	1	cbiQ	ABC-type cobalt transport system, permease	K02008	COG0619	P	ABC-type cobalt transport system, permease component CbiQ and related transporters
278	CaPaus	YP_001798851	NC_010544	141	210351	211298	948	-1	cbiQ	ABC-type cobalt transport system,permease component	K02008	COG0619	P	ABC-type cobalt transport system, permease component CbiQ and related transporters
278	CaPmal	YP_002004402	NC_011047	360	440038	441081	1044	1	cbiQ	cobalt ABC transporter permease	K02008	COG0619	P	ABC-type cobalt transport system, permease component CbiQ and related transporters
278	PNWB_v1	c4750	Contig3B	32	18045	19046	1002	1	cbiQ	ABC-type cobalt transport system, permease component	K02008	COG0619	P	ABC-type cobalt transport system, permease component CbiQ and related transporters
279	CaPastA	YP_456688	NC_007716	492	516685	517308	624	-1	tmk	thymidylate kinase	K00943	COG0125	F	Thymidylate kinase
279	CaPastO	NP_950482	NC_005303	230	258513	259136	624	1	tmk	thymidylate kinase	K00943	COG0125	F	Thymidylate kinase
279	CaPaus	YP_001798847	NC_010544	137	203171	203800	630	-1	tmk	Thymidylate kinase	K00943	COG0125	F	Thymidylate kinase
279	CaPmal	YP_002004404	NC_011047	362	441862	442488	627	1	tmk	thymidylate kinase	K00943	COG0125	F	Thymidylate kinase
279	PNWB_v1	c4760	Contig3B	33	19144	19764	621	1	tmk	thymidylate kinase	K00943	COG0125	F	Thymidylate kinase
280	CaPastA	YP_456687	NC_007716	491	515702	516688	987	-1	holB	DNA polymerase III, delta prime subunit	K02341	COG0470	L	ATPase involved in DNA replication
280	CaPastO	NP_950483	NC_005303	231	259133	260122	990	1	holB	DNA polymerase III, delta prime subunit	K02341	COG0470	L	ATPase involved in DNA replication
280	CaPaus	YP_001798846	NC_010544	136	202245	203192	948	-1	holB	DNA polymerase III, delta prime subunit	K02341	COG0470	L	ATPase involved in DNA replication
280	CaPmal	YP_002004405	NC_011047	363	442488	443444	957	1	holB	DNA polymerase III subunit delta'	K02341	COG0470	L	ATPase involved in DNA replication
280	PNWB_v1	c4770	Contig3B	34	19770	20717	948	1	holB	DNA polymerase III subunit delta'	K02341	COG0470	L	ATPase involved in DNA replication
281	CaPastA	YP_456686	NC_007716	490	514760	515617	858	-1	tpm	tetrapyrrole (Corrin/Porphyrin) methylase	K07056	COG0313	R	Predicted methyltransferases
281	CaPastO	NP_950484	NC_005303	232	260206	261063	858	1	NA	hypothetical protein	K07056	COG0313	R	Predicted methyltransferases
281	CaPaus	YP_001798845	NC_010544	135	201350	202219	870	-1	NA	Putative methyltransferase	K07056	COG0313	R	Predicted methyltransferases
281	CaPmal	YP_002004406	NC_011047	364	443475	444317	843	1	tpm	tetrapyrrole (Corrin/Porphyrin) methylase	K07056	COG0313	R	Predicted methyltransferases
281	PNWB_v1	c4780	Contig3B	35	20732	21604	873	1	tpm	tetrapyrrole (Corrin/Porphyrin) methylase	K07056	COG0313	R	Predicted methyltransferases
282	CaPastA	YP_456685	NC_007716	489	513112	514674	1563	-1	metG	methionyl-tRNA synthetase	K01874	COG0143	J	Methionyl-tRNA synthetase
282	CaPastO	NP_950485	NC_005303	233	261149	262711	1563	1	metG	methionyl-tRNA synthetase	K01874	COG0143	J	Methionyl-tRNA synthetase
282	CaPaus	YP_001798806	NC_010544	96	145853	147406	1554	-1	metG	methionyl-tRNA synthetase	K01874	COG0143	J	Methionyl-tRNA synthetase
282	CaPmal	YP_002004407	NC_011047	365	444321	445874	1554	1	metG	methionyl-tRNA synthetase	K01874	COG0143	J	Methionyl-tRNA synthetase
282	PNWB_v1	c4790	Contig3B	36	21620	23203	1584	1	metG	methionyl-tRNA synthetase	K01874	COG0143	J	Methionyl-tRNA synthetase
283	CaPastA	YP_456358	NC_007716	162	183603	184277	675	1	NA	hypothetical protein	NA	NA	X	NA
283	CaPastO	NP_950565	NC_005303	312	358467	359141	675	1	NA	hypothetical protein	NA	NA	X	NA
283	CaPastO	NP_950605	NC_005303	352	399502	400176	675	1	NA	hypothetical protein	NA	NA	X	NA
283	CaPastO	NP_950760	NC_005303	504	575139	575801	663	-1	NA	hypothetical protein	NA	NA	X	NA
283	CaPastO	NP_950809	NC_005303	553	622961	623635	675	1	NA	hypothetical protein	NA	NA	X	NA
284	CaPastO	NP_950606	NC_005303	353	400208	401287	1080	1	NA	hypothetical protein	NA	NA	X	NA
284	CaPastO	NP_950780	NC_005303	524	596565	597347	783	-1	NA	hypothetical protein	NA	NA	X	NA
284	CaPastO	NP_950810	NC_005303	554	623667	624746	1080	1	NA	hypothetical protein	NA	NA	X	NA
284	CaPaus	YP_001799137	NC_010544	427	560507	562123	1617	-1	NA	hypothetical protein	NA	NA	X	NA
284	CaPmal	YP_002004127	NC_011047	85	114090	117662	3573	1	NA	hypothetical protein	NA	NA	X	NA
285	CaPastA	YP_456417	NC_007716	221	233494	234099	606	-1	NA	hypothetical protein	NA	NA	X	NA
285	CaPastO	NP_950641	NC_005303	388	434946	435569	624	-1	NA	hypothetical protein	NA	NA	X	NA
285	CaPastO	NP_950898	NC_005303	641	732674	733297	624	-1	NA	hypothetical protein	NA	NA	X	NA
285	CaPaus	YP_001798934	NC_010544	224	330518	331123	606	-1	NA	hypothetical protein	NA	NA	X	NA
285	CaPaus	YP_001798982	NC_010544	272	375900	376505	606	-1	NA	hypothetical protein	NA	NA	X	NA
286	CaPastA	YP_456523	NC_007716	327	347984	348400	417	1	nusB	N utilization substance protein B	K03625	COG0781	K	Transcription termination factor
286	CaPastO	NP_950695	NC_005303	438	484321	484770	450	1	nusB	transcription termination factor	K03625	COG0781	K	Transcription termination factor
286	CaPaus	YP_001799389	NC_010544	679	874559	874975	417	-1	nusB	Transcription termination factor	K03625	COG0781	K	Transcription termination factor
286	CaPmal	YP_002004071	NC_011047	29	36836	37264	429	-1	nusB	transcription termination factor	K03625	COG0781	K	Transcription termination factor
286	CaPmal	YP_002004495	NC_011047	451	564680	565108	429	1	nusB	transcription termination factor	K03625	COG0781	K	Transcription termination factor
287	CaPastA	YP_456440	NC_007716	244	253401	254267	867	1	degV	DegV family protein	NA	NA	X	NA
287	CaPastO	NP_950835	NC_005303	579	652918	653784	867	-1	degV	hypothetical protein	NA	NA	X	NA
287	CaPaus	YP_001798774	NC_010544	64	99914	100780	867	1	degV	Uncharacterised BCR	NA	NA	X	NA
287	CaPmal	YP_002004134	NC_011047	92	123660	124535	876	1	degV	BCR family protein	NA	NA	X	NA
287	CaPmal	YP_002004135	NC_011047	93	124755	125630	876	1	degV	BCR family protein	NA	NA	X	NA
288	CaPastA	YP_456262	NC_007716	66	77554	80097	2544	1	polA	DNA polymerase I	K02335	COG0258;COG0749	L	5'-3' exonuclease (including N-terminal domain of PolI);DNA polymerase I - 3'-5' exonuclease and polymerase domains
288	CaPastO	NP_950927	NC_005303	670	766108	767550	1443	-1	polA	DNA polymerase I	K02335	COG0258;COG0749	L	5'-3' exonuclease (including N-terminal domain of PolI);DNA polymerase I - 3'-5' exonuclease and polymerase domains
288	CaPastO	NP_950928	NC_005303	671	767726	768694	969	-1	exo	5'-3' exonuclease	K02335	COG0258;COG0749	L	5'-3' exonuclease (including N-terminal domain of PolI);DNA polymerase I - 3'-5' exonuclease and polymerase domains
288	CaPaus	YP_001799379	NC_010544	669	850502	852532	2031	-1	polA	DNA polymerase I	K02335	COG0258;COG0749	L	5'-3' exonuclease (including N-terminal domain of PolI);DNA polymerase I - 3'-5' exonuclease and polymerase domains
288	CaPmal	YP_002004112	NC_011047	70	86622	87509	888	-1	polA	DNA polymerase I	K02335	COG0258;COG0749	L	5'-3' exonuclease (including N-terminal domain of PolI);DNA polymerase I - 3'-5' exonuclease and polymerase domains
289	CaPaus	YP_001798942	NC_010544	232	339928	340599	672	1	fliA	DNA-directed RNA polymerase,specialized sigma subunit	NA	NA	X	NA
289	CaPaus	YP_001799021	NC_010544	311	410521	411192	672	-1	fliA	Putative DNA-directed RNA polymerase,specialized sigma subunit	NA	NA	X	NA
289	CaPaus	YP_001799296	NC_010544	586	739459	740133	675	1	fliA	DNA-directed RNA polymerase specialized sigma subunit	NA	NA	X	NA
289	CaPaus	YP_001799347	NC_010544	637	812534	813205	672	1	fliA	DNA-directed RNA polymerase specialized sigma subunit	NA	NA	X	NA
289	CaPaus	YP_001799370	NC_010544	660	833979	834650	672	-1	NA	DNA-directed RNA polymerase specialized sigma subunit	NA	NA	X	NA
290	CaPastA	YP_456536	NC_007716	340	365573	365770	198	-1	NA	hypothetical protein	NA	NA	X	NA
290	CaPastO	NP_950584	NC_005303	331	377580	377939	360	1	NA	hypothetical protein	NA	NA	X	NA
290	CaPastO	NP_950624	NC_005303	371	418473	418832	360	1	NA	hypothetical protein	NA	NA	X	NA
290	PNWB_v1	c0130	Contig1A	6	13172	13546	375	-1	NA	putative effector, AYWB SAP06-like protein	NA	NA	X	NA
291	CaPastA	YP_456268	NC_007716	72	85274	85663	390	1	NA	hypothetical protein	NA	NA	X	NA
291	CaPastA	YP_456564	NC_007716	368	385372	385863	492	-1	NA	hypothetical protein	NA	NA	X	NA
291	CaPastO	NP_950829	NC_005303	573	646867	647355	489	1	NA	hypothetical protein	NA	NA	X	NA
291	PNWB_v1	c0140	Contig1A	7	13565	14038	474	-1	NA	putative effector, AYWB SAP67-like protein	NA	NA	X	NA
292	CaPastA	YP_456420	NC_007716	224	236169	236543	375	-1	NA	hypothetical protein	NA	NA	X	NA
292	CaPastO	NP_950301	NC_005303	49	61011	61388	378	1	NA	hypothetical protein	NA	NA	X	NA
292	PNWB_v1	c0190	Contig1A	11	18413	18781	369	1	NA	putative effector, AYWB SAP54-like protein	NA	NA	X	NA
292	PNWB_v1	c0680	Contig1C	2	919	1224	306	-1	NA	putative effector	NA	NA	X	NA
293	CaPastA	YP_456583	NC_007716	387	397088	397537	450	-1	NA	hypothetical protein	NA	NA	X	NA
293	CaPastO	NP_950644	NC_005303	391	437673	438128	456	-1	NA	hypothetical protein	NA	NA	X	NA
293	PNWB_v1	c0230	Contig1A	14	21725	22177	453	-1	NA	putative effector, AYWB SAP08-like protein	NA	NA	X	NA
293	PNWB_v1	c0670	Contig1C	1	113	571	459	1	NA	putative effector, AYWB SAP08-like protein	NA	NA	X	NA
294	CaPastA	YP_456228	NC_007716	32	46277	46684	408	1	NA	hypothetical protein	NA	NA	X	NA
294	CaPastO	NP_950770	NC_005303	514	584862	585269	408	1	NA	hypothetical protein	NA	NA	X	NA
294	CaPmal	YP_002004488	NC_011047	444	555176	555583	408	1	NA	hypothetical protein	NA	NA	X	NA
294	PNWB_v1	c0320	Contig1A	22	34051	34401	351	-1	NA	putative effector, AYWB SAP05-like protein	NA	NA	X	NA
295	CaPastO	NP_950594	NC_005303	341	388385	390145	1761	-1	NA	retron-type reverse transcriptase	NA	NA	X	NA
295	CaPaus	YP_001799062	NC_010544	352	467077	468642	1566	-1	NA	Retron-type reverse transcriptase	NA	NA	X	NA
295	PNWB_v1	c0440	Contig1B	8	12027	13556	1530	1	NA	retron-type reverse transcriptase	NA	NA	X	NA
295	PNWB_v1	c1270	Contig1G	7	8626	9885	1260	-1	NA	retron-type reverse transcriptase	NA	NA	X	NA
296	CaPastA	YP_456565	NC_007716	369	385948	386340	393	-1	NA	hypothetical protein	NA	NA	X	NA
296	CaPastO	NP_950792	NC_005303	536	605503	605880	378	1	NA	hypothetical protein	NA	NA	X	NA
296	CaPaus	YP_001798735	NC_010544	25	36144	36536	393	-1	NA	hypothetical protein	NA	NA	X	NA
296	PNWB_v1	c0450	Contig1B	9	13941	14315	375	-1	NA	putative effector, AYWB SAP68-like protein	NA	NA	X	NA
297	CaPastA	YP_456594	NC_007716	398	408194	409963	1770	1	uvrC	excinuclease ABC subunit C	K03703	COG0322	L	Nuclease subunit of the excinuclease complex
297	CaPastO	NP_950685	NC_005303	428	473494	474879	1386	-1	uvrC	nuclease subunit of the excinuclease complex	K03703	COG0322	L	Nuclease subunit of the excinuclease complex
297	CaPaus	YP_001799051	NC_010544	341	449680	451473	1794	1	uvrC	excinuclease ABC subunit C	K03703	COG0322	L	Nuclease subunit of the excinuclease complex
297	PNWB_v1	c0790	Contig1C	11	15407	17044	1638	1	uvrC	excinuclease ABC subunit C	K03703	COG0322	L	Nuclease subunit of the excinuclease complex
298	CaPastA	YP_456532	NC_007716	336	359940	362858	2919	-1	uvrA	excinuclease ABC subunit A	K03701	COG0178	L	Excinuclease ATPase subunit
298	CaPastO	NP_950702	NC_005303	446	496528	499446	2919	-1	uvrA	excinuclease ATPase subunit	K03701	COG0178	L	Excinuclease ATPase subunit
298	CaPaus	YP_001799274	NC_010544	564	712098	714923	2826	1	uvrA	Excinuclease ATPase subunit A	K03701	COG0178	L	Excinuclease ATPase subunit
298	PNWB_v1	c0800	Contig1C	12	17092	19935	2844	1	uvrA	excinuclease ABC subunit A	K03701	COG0178	L	Excinuclease ATPase subunit
299	CaPastA	YP_456595	NC_007716	399	410082	412085	2004	1	uvrB	excinuclease ABC subunit B	K03702	COG0556	L	Helicase subunit of the DNA excision repair complex
299	CaPastO	YP_002154423	NC_005303	427	471114	473126	2013	-1	uvrB	helicase subunit of the DNA excision repair	NA	NA	X	NA
299	CaPaus	YP_001799052	NC_010544	342	452651	454642	1992	1	uvrB	excinuclease ABC subunit B	K03702	COG0556	L	Helicase subunit of the DNA excision repair complex
299	PNWB_v1	c0810	Contig1C	13	19925	21892	1968	1	uvrB	excinuclease ABC subunit B	K03702	COG0556	L	Helicase subunit of the DNA excision repair complex
300	CaPastA	YP_456633	NC_007716	437	447446	448738	1293	-1	eno	phosphopyruvate hydratase	K01689	COG0148	G	Enolase
300	CaPastO	NP_950536	NC_005303	283	329038	330330	1293	1	eno	enolase	K01689	COG0148	G	Enolase
300	CaPaus	YP_001798750	NC_010544	40	62092	63384	1293	1	eno	phosphopyruvate hydratase	K01689	COG0148	G	Enolase
300	PNWB_v1	c0880	Contig1C	17	29224	30279	1056	1	eno	enolase	K01689	COG0148	G	Enolase
301	CaPastA	YP_456238	NC_007716	42	51203	51829	627	-1	NA	hypothetical protein	NA	NA	X	NA
301	CaPastO	NP_950305	NC_005303	53	65858	66352	495	1	NA	hypothetical protein	NA	NA	X	NA
301	CaPaus	YP_001798802	NC_010544	92	140839	141360	522	1	NA	hypothetical protein	NA	NA	X	NA
301	PNWB_v1	c0950	Contig1C	24	36318	36983	666	-1	NA	putative effector	NA	NA	X	NA
302	CaPastO	NP_950497	NC_005303	245	272915	274171	1257	1	pepP	xaa-Pro aminopeptidase	K01262	COG0006	E	Xaa-Pro aminopeptidase
302	CaPaus	YP_001799254	NC_010544	544	688097	689359	1263	-1	pepP	Xaa-Pro aminopeptidase	K01262	COG0006	E	Xaa-Pro aminopeptidase
302	CaPmal	YP_002004084	NC_011047	42	55362	56624	1263	-1	pepP	Xaa-Pro aminopeptidase	K01262	COG0006	E	Xaa-Pro aminopeptidase
302	PNWB_v1	c0960	Contig1C	25	37309	38541	1233	1	pepP	xaa-Pro aminopeptidase	K01262	COG0006	E	Xaa-Pro aminopeptidase
303	CaPastA	YP_456807	NC_007716	611	633789	634196	408	-1	NA	hypothetical protein	NA	NA	X	NA
303	CaPastO	NP_950350	NC_005303	98	124440	124871	432	1	NA	hypothetical protein	NA	NA	X	NA
303	CaPaus	YP_001799054	NC_010544	344	456017	456907	891	1	NA	Putative ABC-type metal ion transport system periplasmic component/surface antigen	NA	NA	X	NA
303	PNWB_v1	c1020	Contig1D	1	873	1796	924	-1	nlpA1	putative ABC-type metal ion transport system, periplasmic component/surface antigen	NA	NA	X	NA
304	CaPastA	YP_456622	NC_007716	426	435403	435747	345	1	NA	hypothetical protein	NA	NA	X	NA
304	CaPastO	NP_950549	NC_005303	296	343147	343494	348	-1	NA	hypothetical protein	NA	NA	X	NA
304	CaPaus	YP_001799087	NC_010544	377	496819	497163	345	-1	NA	hypothetical protein	NA	NA	X	NA
304	PNWB_v1	c1050	Contig1D	4	3284	3628	345	-1	NA	putative effector	NA	NA	X	NA
305	CaPastA	YP_456615	NC_007716	419	432410	433027	618	1	smtA	SAM-dependent methyltransferase	NA	NA	X	NA
305	CaPastO	NP_950555	NC_005303	302	345993	346577	585	-1	smtA	SAM-dependent methyltransferase	NA	NA	X	NA
305	CaPaus	YP_001799093	NC_010544	383	499566	500165	600	-1	smtA	SAM-dependent methyltransferase	NA	NA	X	NA
305	PNWB_v1	c1120	Contig1E	2	1384	2013	630	-1	smtA	SAM-dependent methyltransferase	NA	NA	X	NA
306	CaPastA	YP_456566	NC_007716	370	386358	386723	366	-1	NA	hypothetical protein	NA	NA	X	NA
306	CaPastO	NP_950771	NC_005303	515	585303	585638	336	1	NA	hypothetical protein	NA	NA	X	NA
306	CaPmal	YP_002004226	NC_011047	184	245598	245966	369	-1	NA	hypothetical protein	NA	NA	X	NA
306	PNWB_v1	c1450	Contig1G	23	32026	32367	342	1	NA	putative effector, AYWB SAP11-like protein	NA	NA	X	NA
307	CaPastA	YP_456295	NC_007716	99	116435	117298	864	1	degV	DegV family protein	NA	NA	X	NA
307	CaPastO	NP_950888	NC_005303	631	720990	721853	864	-1	degV	hypothetical protein	NA	NA	X	NA
307	CaPaus	YP_001798716	NC_010544	6	10370	11221	852	1	degV	DegV family protein	NA	NA	X	NA
307	PNWB_v1	c1540	Contig1G	32	43965	44825	861	-1	degV	DegV family protein	NA	NA	X	NA
308	CaPastA	YP_456609	NC_007716	413	425092	425775	684	1	NA	hypothetical protein	NA	NA	X	NA
308	CaPastO	NP_950560	NC_005303	307	353275	353958	684	-1	NA	hypothetical protein	NA	NA	X	NA
308	CaPaus	YP_001799123	NC_010544	413	538160	538828	669	1	NA	hypothetical protein	NA	NA	X	NA
308	PNWB_v1	c1670	Contig1G	42	58590	59225	636	-1	NA	hypothetical protein	NA	NA	X	NA
309	CaPastA	YP_456665	NC_007716	469	487944	490397	2454	-1	mgtA	cation transport ATPase	NA	NA	X	NA
309	CaPastO	NP_950504	NC_005303	251	286852	290022	3171	1	mgtA	cation transport ATPase	NA	NA	X	NA
309	CaPaus	YP_001799248	NC_010544	538	673464	675896	2433	-1	mgtA	Cation transport ATPase	NA	NA	X	NA
309	PNWB_v1	c2320	Contig1H	42	56527	58944	2418	-1	mgtA2	cation transport ATPase	NA	NA	X	NA
310	CaPastA	YP_456772	NC_007716	576	596732	597436	705	-1	spoU	23S rRNA methyltransferase	K03437	COG0566	J	rRNA methylases
310	CaPastO	NP_950396	NC_005303	144	170667	171371	705	1	spoU	rRNA methylase	K03437	COG0566	J	rRNA methylases
310	CaPmal	YP_002004249	NC_011047	207	281805	282521	717	1	spoU	rRNA methylase	K03437	COG0566	J	rRNA methylases
310	PNWB_v1	c2490	Contig1H	59	84746	85498	753	-1	spoU	rRNA methylase	K03437	COG0566	J	rRNA methylases
311	CaPastA	YP_456672	NC_007716	476	504112	504261	150	-1	rpmG	50S ribosomal protein L33	K02913	COG0267	J	Ribosomal protein L33
311	CaPastO	NP_950496	NC_005303	244	272498	272647	150	1	rpmG	ribosomal protein L33	K02913	COG0267	J	Ribosomal protein L33
311	CaPaus	YP_001799255	NC_010544	545	689421	689570	150	-1	rpmG	50S ribosomal protein L33	K02913	COG0267	J	Ribosomal protein L33
311	PNWB_v1	c2720	Contig1I	7	12227	12376	150	-1	rpmG	50S ribosomal protein L33	K02913	COG0267	J	Ribosomal protein L33
312	CaPastA	YP_456225	NC_007716	29	40024	41868	1845	1	evbH	multidrug resistance ABC transporter ATP-binding and permease protein	K06147	COG1132;COG2274;COG5265	OV	ABC-type multidrug transport system, ATPase and permease components;ABC-type bacteriocin/lantibiotic exporters, contain an N-terminal double-glycine peptidase domain;ABC-type transport system involved in Fe-S cluster assembly, permease and ATPase components
312	CaPaus	YP_001798793	NC_010544	83	125990	127762	1773	1	NA	Putative ABC transporter subunit	K06147	COG1132;COG2274;COG5265	OV	ABC-type multidrug transport system, ATPase and permease components;ABC-type bacteriocin/lantibiotic exporters, contain an N-terminal double-glycine peptidase domain;ABC-type transport system involved in Fe-S cluster assembly, permease and ATPase components
312	CaPmal	YP_002004150	NC_011047	108	146352	148124	1773	-1	evbH	multidrug resistance ABC transporter, ATP-binding and permease protein	K06147	COG1132;COG2274;COG5265	OV	ABC-type multidrug transport system, ATPase and permease components;ABC-type bacteriocin/lantibiotic exporters, contain an N-terminal double-glycine peptidase domain;ABC-type transport system involved in Fe-S cluster assembly, permease and ATPase components
312	PNWB_v1	c2850	Contig1I	20	24713	26554	1842	-1	evbH	multidrug resistance ABC transporter ATP-binding and permease protein	K06147	COG1132;COG2274;COG5265	OV	ABC-type multidrug transport system, ATPase and permease components;ABC-type bacteriocin/lantibiotic exporters, contain an N-terminal double-glycine peptidase domain;ABC-type transport system involved in Fe-S cluster assembly, permease and ATPase components
313	CaPastA	YP_456650	NC_007716	454	469126	469764	639	1	gidB	16S rRNA methyltransferase GidB	K03501	COG0357	M	Predicted S-adenosylmethionine-dependent methyltransferase involved in bacterial cell division
313	CaPastO	NP_950519	NC_005303	266	307603	308241	639	-1	gidB	S-adenosylmethionine-dependent	K03501	COG0357	M	Predicted S-adenosylmethionine-dependent methyltransferase involved in bacterial cell division
313	CaPaus	YP_001799228	NC_010544	518	645351	645977	627	1	gidB	16S rRNA methyltransferase GidB	K03501	COG0357	M	Predicted S-adenosylmethionine-dependent methyltransferase involved in bacterial cell division
313	PNWB_v1	c3180	Contig1I	50	73224	73841	618	-1	gidB	16S rRNA methyltransferase	K03501	COG0357	M	Predicted S-adenosylmethionine-dependent methyltransferase involved in bacterial cell division
314	CaPastA	YP_456730	NC_007716	534	549556	550374	819	-1	NA	hypothetical protein	NA	NA	X	NA
314	CaPastO	NP_950437	NC_005303	185	220738	221556	819	1	NA	hypothetical protein	NA	NA	X	NA
314	CaPmal	YP_002004287	NC_011047	245	326374	327078	705	1	NA	hypothetical protein	NA	NA	X	NA
314	PNWB_v1	c3290	Contig2A	4	7499	8248	750	1	NA	hypothetical protein	NA	NA	X	NA
315	CaPastA	YP_456631	NC_007716	435	444283	445650	1368	-1	citS	citrate-sodium symport	NA	NA	X	NA
315	CaPastO	NP_950538	NC_005303	285	332415	333560	1146	1	citS	malate/citrate symporter	NA	NA	X	NA
315	CaPmal	YP_002004191	NC_011047	149	192248	193657	1410	-1	mleP	malate/Na+ symporter	NA	NA	X	NA
315	PNWB_v1	c3720	Contig2A	46	55624	57027	1404	-1	citS2	citrate-sodium symporter	NA	NA	X	NA
316	CaPastA	YP_456296	NC_007716	100	118135	118953	819	-1	cof	HAD family hydrolase	NA	NA	X	NA
316	CaPastO	NP_950886	NC_005303	630	719352	720158	807	1	NA	hypothetical protein	NA	NA	X	NA
316	CaPaus	YP_001798719	NC_010544	9	12270	13058	789	-1	NA	Putative hydrolases of the haloacid dehalogenase-like (HAD) superfamily	NA	NA	X	NA
316	PNWB_v1	c3730	Contig2A	47	57694	58476	783	1	cof	HAD family hydrolase	NA	NA	X	NA
317	CaPastA	YP_456630	NC_007716	434	442872	444212	1341	-1	pykF	pyruvate kinase	K00873	COG0469	G	Pyruvate kinase
317	CaPastO	NP_950539	NC_005303	286	333629	334969	1341	1	pykF	pyruvate kinase	K00873	COG0469	G	Pyruvate kinase
317	CaPaus	YP_001798752	NC_010544	42	66465	67820	1356	1	pykA	Pyruvate kinase	K00873	COG0469	G	Pyruvate kinase
317	PNWB_v1	c3790	Contig2A	53	66500	67837	1338	1	pyk	pyruvate kinase	K00873	COG0469	G	Pyruvate kinase
318	CaPastA	YP_456736	NC_007716	540	558250	559110	861	-1	cbiO	cobalt transport ATP-binding protein cbiO	K02006	COG1122	P	ABC-type cobalt transport system, ATPase component
318	CaPaus	YP_001798852	NC_010544	142	211311	212165	855	-1	cbiO2	ABC-type Cobalt import ATP-binding protein CbiO 2	K02006	COG1122	P	ABC-type cobalt transport system, ATPase component
318	CaPmal	YP_002004401	NC_011047	359	439169	440014	846	1	cbiO	cobalt transport ATP-binding protein cbiO	K02006	COG1122	P	ABC-type cobalt transport system, ATPase component
318	PNWB_v1	c4740	Contig3B	31	17189	18040	852	1	cbiO1	ABC-type cobalt transport system, ATPase component	K02006	COG1122	P	ABC-type cobalt transport system, ATPase component
319	CaPastA	YP_456456	NC_007716	260	270423	271004	582	1	NA	hypothetical protein	NA	NA	X	NA
319	CaPastO	NP_950745	NC_005303	489	558252	558833	582	-1	NA	hypothetical protein	NA	NA	X	NA
319	CaPmal	YP_002004284	NC_011047	242	319751	320311	561	1	NA	hypothetical protein	NA	NA	X	NA
319	PNWB_v1	c4800	Contig3B	37	23324	23731	408	1	NA	hypothetical protein	NA	NA	X	NA
320	CaPastA	YP_456197	NC_007716	1	1	1515	1515	1	dnaA	chromosomal replication initiation protein	K02313	COG0593	L	ATPase involved in DNA replication initiation
320	CaPastO	NP_950253	NC_005303	1	1	1524	1524	1	dnaA	chromosomal replication initiator protein	K02313	COG0593	L	ATPase involved in DNA replication initiation
320	CaPaus	YP_001798711	NC_010544	1	1	1368	1368	1	dnaA	Chromosomal replication initiator protein	K02313	COG0593	L	ATPase involved in DNA replication initiation
320	CaPmal	YP_002004230	NC_011047	188	250608	251975	1368	1	dnaA	chromosomal replication initiator protein	K02313	COG0593	L	ATPase involved in DNA replication initiation
321	CaPastA	YP_456792	NC_007716	596	618093	620330	2238	-1	spoT	GTP pyrophosphokinase	K00951	COG0317	KT	Guanosine polyphosphate pyrophosphohydrolases/synthetases
321	CaPastO	NP_950378	NC_005303	126	148452	150842	2391	1	spoT	guanosine polyphosphate pyrophosphohydrolase/synthetase	K00951	COG0317	KT	Guanosine polyphosphate pyrophosphohydrolases/synthetases
321	CaPaus	YP_001799326	NC_010544	616	782074	784251	2178	1	relA	GTP pyrophosphokinase	K00951	COG0317	KT	Guanosine polyphosphate pyrophosphohydrolases/synthetases
321	CaPmal	YP_002004218	NC_011047	176	231008	233212	2205	-1	spoT	guanosine polyphosphate pyrophosphohydrolase/synthetase	K00951	COG0317	KT	Guanosine polyphosphate pyrophosphohydrolases/synthetases
322	CaPastA	YP_456788	NC_007716	592	613490	614800	1311	-1	mesJ	cell cycle protein MesJ	K04075	COG0037	D	Predicted ATPase of the PP-loop superfamily implicated in cell cycle control
322	CaPastO	NP_950381	NC_005303	129	154195	155505	1311	1	mesJ	hypothetical protein	K04075	COG0037	D	Predicted ATPase of the PP-loop superfamily implicated in cell cycle control
322	CaPaus	YP_001799073	NC_010544	363	484147	485454	1308	1	mesJ	Cell cycle protein	K04075	COG0037	D	Predicted ATPase of the PP-loop superfamily implicated in cell cycle control
322	CaPmal	YP_002004305	NC_011047	263	346567	347814	1248	1	tilS	tRNA(Ile)-lysidine synthase	K04075	COG0037	D	Predicted ATPase of the PP-loop superfamily implicated in cell cycle control
323	CaPastA	YP_456785	NC_007716	589	609398	610093	696	-1	metN	methionine transport ATP-binding protein	K02071	COG1135	P	ABC-type metal ion transport system, ATPase component
323	CaPastO	NP_950384	NC_005303	132	159000	159611	612	1	abc	ABC-type transport system ATPase	K02071	COG1135	P	ABC-type metal ion transport system, ATPase component
323	CaPaus	YP_001799076	NC_010544	366	488470	489162	693	1	metN	D-methionine transport system ATP-binding protein	K02071	COG1135	P	ABC-type metal ion transport system, ATPase component
323	CaPmal	YP_002004197	NC_011047	155	200839	201528	690	1	metN	methionine transport ATP-binding protein	K02071	COG1135	P	ABC-type metal ion transport system, ATPase component
324	CaPastA	YP_456784	NC_007716	588	608269	609315	1047	-1	nlpA	ABC-type methionine transport system, periplasmic component	NA	NA	X	NA
324	CaPastO	NP_950385	NC_005303	133	159694	160737	1044	1	nlpA	ABC transporter periplasmic component	NA	NA	X	NA
324	CaPaus	YP_001799077	NC_010544	367	489199	490224	1026	1	metQ	Putative D-methionine transport system substrate-binding protein	NA	NA	X	NA
324	CaPmal	YP_002004229	NC_011047	187	248530	249600	1071	-1	NA	ABC-type methionine transport system, periplasmic component	NA	NA	X	NA
325	CaPastA	YP_456783	NC_007716	587	607555	608256	702	-1	NA	methionine transport ATP-binding protein	K02072	COG2011	P	ABC-type metal ion transport system, permease component
325	CaPastO	NP_950386	NC_005303	134	160750	161451	702	1	NA	ABC transporter permease	K02072	COG2011	P	ABC-type metal ion transport system, permease component
325	CaPaus	YP_001799078	NC_010544	368	490226	490939	714	1	metl	D-methionine transport system permease protein	K02072	COG2011	P	ABC-type metal ion transport system, permease component
325	CaPmal	YP_002004228	NC_011047	186	247764	248516	753	-1	NA	D-methionine ABC transporter, permease component	K02072	COG2011	P	ABC-type metal ion transport system, permease component
326	CaPastA	YP_456781	NC_007716	585	606843	607067	225	-1	rpsO	30S ribosomal protein S15	K02956	COG0184	J	Ribosomal protein S15P/S13E
326	CaPastO	NP_950388	NC_005303	136	161971	162195	225	1	rpsO	ribosomal protein S15P/S13E	K02956	COG0184	J	Ribosomal protein S15P/S13E
326	CaPaus	YP_001799080	NC_010544	370	491362	491580	219	1	rpsO	30S ribosomal protein S15	K02956	COG0184	J	Ribosomal protein S15P/S13E
326	CaPmal	YP_002004302	NC_011047	260	342953	343168	216	1	rpsO	30S ribosomal protein S15	K02956	COG0184	J	Ribosomal protein S15P/S13E
327	CaPastA	YP_456757	NC_007716	561	580878	581717	840	-1	hlyC	hemolysin III	K11068	COG1272	R	Predicted membrane protein, hemolysin III homolog
327	CaPastO	NP_950410	NC_005303	158	188497	189192	696	1	NA	hemolysin III	K11068	COG1272	R	Predicted membrane protein, hemolysin III homolog
327	CaPaus	YP_001798798	NC_010544	88	133720	134424	705	1	NA	Hemolysin III related protein	K11068	COG1272	R	Predicted membrane protein, hemolysin III homolog
327	CaPmal	YP_002004351	NC_011047	309	400296	401018	723	1	NA	channel protein, hemolysin III family	K11068	COG1272	R	Predicted membrane protein, hemolysin III homolog
328	CaPastA	YP_456754	NC_007716	558	576722	577429	708	1	NA	hypothetical protein	NA	NA	X	NA
328	CaPastO	NP_950413	NC_005303	161	192871	193596	726	-1	NA	hypothetical protein	NA	NA	X	NA
328	CaPaus	YP_001798836	NC_010544	126	189286	189981	696	1	NA	hypothetical protein	NA	NA	X	NA
328	CaPaus	YP_001798978	NC_010544	268	370915	371727	813	-1	NA	hypothetical protein	NA	NA	X	NA
329	CaPastA	YP_456753	NC_007716	557	575715	576443	729	-1	NA	hypothetical protein	NA	NA	X	NA
329	CaPastO	NP_950414	NC_005303	162	193875	194648	774	1	NA	hypothetical protein	NA	NA	X	NA
329	CaPaus	YP_001799108	NC_010544	398	514316	515008	693	-1	NA	hypothetical protein	NA	NA	X	NA
329	CaPmal	YP_002004263	NC_011047	221	302821	303453	633	1	NA	hypothetical protein	NA	NA	X	NA
330	CaPastA	YP_456745	NC_007716	549	568722	569546	825	-1	tpiA	triosephosphate isomerase	K01803	COG0149	G	Triosephosphate isomerase
330	CaPastO	NP_950422	NC_005303	170	200974	201798	825	1	tpiA	triosephosphate isomerase	K01803	COG0149	G	Triosephosphate isomerase
330	CaPaus	YP_001799100	NC_010544	390	507657	508463	807	-1	tpiA	triosephosphate isomerase	K01803	COG0149	G	Triosephosphate isomerase
330	CaPmal	YP_002004206	NC_011047	164	213514	214290	777	1	tpiA	triosephosphate isomerase	K01803	COG0149	G	Triosephosphate isomerase
331	CaPastA	YP_456744	NC_007716	548	567788	568585	798	-1	NA	HAD family hydrolase	NA	NA	X	NA
331	CaPastO	NP_950423	NC_005303	171	201977	202774	798	1	cof	hypothetical protein	NA	NA	X	NA
331	CaPaus	YP_001799099	NC_010544	389	506757	507551	795	-1	cof	Putative hydrolases of the HAD superfamily subfamily IIB	NA	NA	X	NA
331	CaPmal	YP_002004146	NC_011047	104	142307	143113	807	-1	cof	hypothetical protein	NA	NA	X	NA
332	CaPastA	YP_456743	NC_007716	547	566659	567525	867	-1	fba	fructose bisphosphate aldolase	K01624	COG0191	G	Fructose/tagatose bisphosphate aldolase
332	CaPastO	NP_950424	NC_005303	172	203036	203902	867	1	fba	fructose/tagatose bisphosphate aldolase	K01624	COG0191	G	Fructose/tagatose bisphosphate aldolase
332	CaPaus	YP_001799098	NC_010544	388	505806	506672	867	-1	fba	Fructose-bisphosphate aldolase class II	K01624	COG0191	G	Fructose/tagatose bisphosphate aldolase
332	CaPmal	YP_002004149	NC_011047	107	145422	146285	864	-1	fba	fructose-bisphosphate aldolase	K01624	COG0191	G	Fructose/tagatose bisphosphate aldolase
333	CaPastA	YP_456740	NC_007716	544	562639	563319	681	-1	NA	hypothetical protein	NA	NA	X	NA
333	CaPastO	NP_950428	NC_005303	176	207358	208038	681	1	NA	hypothetical protein	NA	NA	X	NA
333	CaPaus	YP_001798856	NC_010544	146	215350	216015	666	-1	NA	hypothetical protein	NA	NA	X	NA
333	CaPmal	YP_002004342	NC_011047	300	388645	389286	642	1	NA	hypothetical protein	NA	NA	X	NA
334	CaPastA	YP_456739	NC_007716	543	561887	562546	660	-1	NA	hypothetical protein	NA	NA	X	NA
334	CaPastO	NP_950429	NC_005303	177	208663	209136	474	1	NA	hypothetical protein	NA	NA	X	NA
334	CaPaus	YP_001798855	NC_010544	145	214712	215329	618	-1	NA	hypothetical protein	NA	NA	X	NA
334	CaPmal	YP_002004313	NC_011047	271	360078	360662	585	-1	NA	hypothetical protein	NA	NA	X	NA
335	CaPastA	YP_456728	NC_007716	532	545087	546583	1497	1	NA	Zn-dependent carboxypeptidase	K01299	COG2317	E	Zn-dependent carboxypeptidase
335	CaPastO	NP_950439	NC_005303	187	224522	225679	1158	-1	NA	Zn-dependent carboxypeptidase	K01299	COG2317	E	Zn-dependent carboxypeptidase
335	CaPmal	YP_002004058	NC_011047	16	19482	20978	1497	-1	NA	Zn-dependent carboxypeptidase	K01299	COG2317	E	Zn-dependent carboxypeptidase
335	CaPmal	YP_002004508	NC_011047	464	580966	582462	1497	1	NA	Zn-dependent carboxypeptidase	K01299	COG2317	E	Zn-dependent carboxypeptidase
336	CaPastA	YP_456721	NC_007716	525	534166	534372	207	-1	rpmF	50S ribosomal protein L32	K02911	COG0333	J	Ribosomal protein L32
336	CaPastO	NP_950450	NC_005303	198	241162	241368	207	1	rpmF	ribosomal protein L32	K02911	COG0333	J	Ribosomal protein L32
336	CaPaus	YP_001799174	NC_010544	464	584654	584851	198	-1	rpmF	50S ribosomal protein L32	K02911	COG0333	J	Ribosomal protein L32
336	CaPmal	YP_002004341	NC_011047	299	388347	388532	186	1	rpmF	50S ribosomal protein L32	K02911	COG0333	J	Ribosomal protein L32
337	CaPastA	YP_456710	NC_007716	514	527972	528295	324	-1	rpmC	50S ribosomal protein L29	K02904	COG0255	J	Ribosomal protein L29
337	CaPastO	NP_950460	NC_005303	208	247531	247851	321	1	rpmC	ribosomal protein L29	K02904	COG0255	J	Ribosomal protein L29
337	CaPaus	YP_001799164	NC_010544	454	579600	579890	291	-1	rpmC	50S ribosomal protein L29	K02904	COG0255	J	Ribosomal protein L29
337	CaPmal	YP_002004380	NC_011047	338	428713	429000	288	1	rpmC	50S ribosomal protein L29	NA	NA	X	NA
338	CaPastA	YP_456700	NC_007716	504	524026	524223	198	-1	rpmD	50S ribosomal protein L30	K02907	COG1841	J	Ribosomal protein L30/L7E
338	CaPastO	NP_950470	NC_005303	218	251600	251797	198	1	rpmD	ribosomal protein L30/L7E	K02907	COG1841	J	Ribosomal protein L30/L7E
338	CaPaus	YP_001799154	NC_010544	444	575627	575824	198	-1	rpmD	50S ribosomal protein L30	K02907	COG1841	J	Ribosomal protein L30/L7E
338	CaPmal	YP_002004390	NC_011047	348	432775	432960	186	1	rpmD	50S ribosomal protein L30	K02907	COG1841	J	Ribosomal protein L30/L7E
339	CaPastA	YP_456689	NC_007716	493	517356	518087	732	-1	truA	tRNA pseudouridine synthase A	K06173	COG0101	J	Pseudouridylate synthase
339	CaPastO	NP_950481	NC_005303	229	257734	258465	732	1	truA	pseudouridylate synthase	K06173	COG0101	J	Pseudouridylate synthase
339	CaPaus	YP_001798848	NC_010544	138	203889	204626	738	-1	truA	tRNA pseudouridine synthase A	K06173	COG0101	J	Pseudouridylate synthase
339	CaPmal	YP_002004403	NC_011047	361	441107	441841	735	1	truA	tRNA pseudouridine synthase A	K06173	COG0101	J	Pseudouridylate synthase
340	CaPastA	YP_456679	NC_007716	483	509513	510250	738	-1	rsuA	16S rRNA pseudouridylate synthase	K06178	COG1187	J	16S rRNA uridine-516 pseudouridylate synthase and related pseudouridylate synthases
340	CaPastO	NP_950490	NC_005303	238	266482	267219	738	1	rsuA	16S rRNA pseudouridylate synthase	K06178	COG1187	J	16S rRNA uridine-516 pseudouridylate synthase and related pseudouridylate synthases
340	CaPaus	YP_001799341	NC_010544	631	804193	804924	732	-1	rsuA	16S rRNA pseudouridylate synthase	K06178	COG1187	J	16S rRNA uridine-516 pseudouridylate synthase and related pseudouridylate synthases
340	CaPmal	YP_002004163	NC_011047	121	162794	163522	729	-1	rsuA	16S rRNA pseudouridylate synthase	K06178	COG1187	J	16S rRNA uridine-516 pseudouridylate synthase and related pseudouridylate synthases
341	CaPastA	YP_456675	NC_007716	479	505695	506015	321	-1	himA	DNA-binding protein HU	K03530	COG0776	L	Bacterial nucleoid DNA-binding protein
341	CaPastO	NP_950494	NC_005303	242	270744	271028	285	1	himA	bacterial nucleoid DNA-binding protein	K03530	COG0776	L	Bacterial nucleoid DNA-binding protein
341	CaPaus	YP_001799258	NC_010544	548	690915	691199	285	-1	huP	DNA-binding protein HU	K03530	COG0776	L	Bacterial nucleoid DNA-binding protein
341	CaPmal	YP_002004159	NC_011047	117	159361	159651	291	-1	NA	nucleoid DNA-binding protein	K03530	COG0776	L	Bacterial nucleoid DNA-binding protein
342	CaPastA	YP_456673	NC_007716	477	504347	505312	966	-1	NA	hypothetical protein	NA	NA	X	NA
342	CaPastO	NP_950495	NC_005303	243	271525	272415	891	1	NA	hypothetical protein	NA	NA	X	NA
342	CaPaus	YP_001799256	NC_010544	546	689616	690515	900	-1	NA	hypothetical protein	NA	NA	X	NA
342	CaPmal	YP_002004157	NC_011047	115	158083	158934	852	-1	NA	hypothetical protein	NA	NA	X	NA
343	CaPastA	YP_456658	NC_007716	462	483410	483820	411	-1	rplL	50S ribosomal protein L7/L12	K02935	COG0222	J	Ribosomal protein L7/L12
343	CaPastO	NP_950511	NC_005303	258	293443	293853	411	1	rplL	ribosomal protein L7/L12	K02935	COG0222	J	Ribosomal protein L7/L12
343	CaPaus	YP_001799241	NC_010544	531	669210	669584	375	-1	rplL	50S ribosomal protein L7/L12	K02935	COG0222	J	Ribosomal protein L7/L12
343	CaPmal	YP_002004420	NC_011047	378	463164	463547	384	1	rplL	50S ribosomal protein L7/L12	K02935	COG0222	J	Ribosomal protein L7/L12
344	CaPastA	YP_456637	NC_007716	441	453835	455430	1596	1	norM	Na+ driven multidrug efflux pump	NA	NA	X	NA
344	CaPastO	NP_950532	NC_005303	279	322195	323790	1596	-1	norM	Na+-driven multidrug efflux pump	NA	NA	X	NA
344	CaPaus	YP_001799216	NC_010544	506	629135	630658	1524	1	norM	Na+-driven multidrug efflux pump	NA	NA	X	NA
344	CaPmal	YP_002004147	NC_011047	105	143168	144679	1512	-1	norM	Na+-driven multidrug efflux pump	NA	NA	X	NA
345	CaPastA	YP_456636	NC_007716	440	451936	452922	987	-1	pfkA	6-phophofructokinase	K00850	COG0205;COG1105	G	6-phosphofructokinase;Fructose-1-phosphate kinase and related fructose-6-phosphate kinase (PfkB)
345	CaPastO	NP_950533	NC_005303	280	324839	325837	999	1	pfkA	6-phosphofructokinase	K00850	COG0205;COG1105	G	6-phosphofructokinase;Fructose-1-phosphate kinase and related fructose-6-phosphate kinase (PfkB)
345	CaPaus	YP_001798842	NC_010544	132	194757	195731	975	1	pfkA	6-phosphofructokinase	K00850	COG0205;COG1105	G	6-phosphofructokinase;Fructose-1-phosphate kinase and related fructose-6-phosphate kinase (PfkB)
345	CaPmal	YP_002004145	NC_011047	103	141328	142287	960	-1	pfkA	6-phosphofructokinase	K00850	COG0205;COG1105	G	6-phosphofructokinase;Fructose-1-phosphate kinase and related fructose-6-phosphate kinase (PfkB)
346	CaPastA	YP_456634	NC_007716	438	448907	450187	1281	-1	pgi	glucose-6-phosphate isomerase	K01810	COG0166	G	Glucose-6-phosphate isomerase
346	CaPastO	NP_950535	NC_005303	282	327589	328869	1281	1	pgi	glucose-6-phosphate isomerase	K01810	COG0166	G	Glucose-6-phosphate isomerase
346	CaPaus	YP_001798844	NC_010544	134	198665	199948	1284	1	pgi	glucose-6-phosphate isomerase	K01810	COG0166	G	Glucose-6-phosphate isomerase
346	CaPmal	YP_002004408	NC_011047	366	446108	447388	1281	1	pgi	glucose-6-phosphate isomerase	K01810	COG0166	G	Glucose-6-phosphate isomerase
347	CaPastA	YP_456617	NC_007716	421	433506	434075	570	1	NA	hypothetical protein	K07015	COG2179	R	Predicted hydrolase of the HAD superfamily
347	CaPastO	NP_950553	NC_005303	300	344911	345480	570	-1	NA	hypothetical protein	K07015	COG2179	R	Predicted hydrolase of the HAD superfamily
347	CaPaus	YP_001799091	NC_010544	381	498536	499090	555	-1	NA	Putative hydrolase of the HAD superfamily	K07015	COG2179	R	Predicted hydrolase of the HAD superfamily
347	CaPmal	YP_002004279	NC_011047	237	314016	314582	567	-1	NA	hypothetical protein	K07015	COG2179	R	Predicted hydrolase of the HAD superfamily
348	CaPastA	YP_456612	NC_007716	416	429028	431622	2595	1	alaS	alanyl-tRNA synthetase	K01872	COG0013	J	Alanyl-tRNA synthetase
348	CaPastO	NP_950557	NC_005303	304	347381	349975	2595	-1	alaS	alanyl-tRNA synthetase	K01872	COG0013	J	Alanyl-tRNA synthetase
348	CaPaus	YP_001799095	NC_010544	385	500619	503210	2592	-1	alaS	alanyl-tRNA synthetase	K01872	COG0013	J	Alanyl-tRNA synthetase
348	CaPmal	YP_002004282	NC_011047	240	315537	318122	2586	-1	alaS	alanyl-tRNA synthetase	K01872	COG0013	J	Alanyl-tRNA synthetase
349	CaPastO	NP_950563	NC_005303	310	357507	357839	333	1	NA	hypothetical protein	NA	NA	X	NA
349	CaPastO	NP_950762	NC_005303	506	576443	576775	333	-1	NA	hypothetical protein	NA	NA	X	NA
349	CaPastO	NP_950783	NC_005303	527	598683	599015	333	-1	NA	hypothetical protein	NA	NA	X	NA
349	CaPastO	NP_950807	NC_005303	551	622001	622333	333	1	NA	hypothetical protein	NA	NA	X	NA
350	CaPastA	YP_456357	NC_007716	161	183167	183640	474	1	NA	hypothetical protein	NA	NA	X	NA
350	CaPastO	NP_950564	NC_005303	311	358034	358504	471	1	NA	hypothetical protein	NA	NA	X	NA
350	CaPastO	NP_950604	NC_005303	351	399066	399539	474	1	NA	hypothetical protein	NA	NA	X	NA
350	CaPastO	NP_950808	NC_005303	552	622528	622998	471	1	NA	hypothetical protein	NA	NA	X	NA
351	CaPastO	NP_950581	NC_005303	328	375253	375576	324	1	NA	hypothetical protein	NA	NA	X	NA
351	CaPastO	NP_950621	NC_005303	368	416146	416469	324	1	NA	hypothetical protein	NA	NA	X	NA
351	CaPastO	NP_950630	NC_005303	377	424246	424584	339	1	NA	hypothetical protein	NA	NA	X	NA
351	CaPastO	NP_950633	NC_005303	380	427492	427803	312	1	NA	hypothetical protein	NA	NA	X	NA
352	CaPastA	YP_456277	NC_007716	81	90834	91145	312	1	NA	hypothetical protein	NA	NA	X	NA
352	CaPastO	NP_950603	NC_005303	350	398554	398871	318	1	NA	hypothetical protein	NA	NA	X	NA
352	CaPastO	NP_950669	NC_005303	416	464516	464833	318	-1	NA	hypothetical protein	NA	NA	X	NA
352	CaPastO	NP_950714	NC_005303	458	515398	515715	318	-1	NA	hypothetical protein	NA	NA	X	NA
353	CaPastA	YP_456506	NC_007716	310	324355	325575	1221	1	csdB	cysteine desulfhydrase	K11717	COG0520	E	Selenocysteine lyase
353	CaPastO	NP_950720	NC_005303	464	524471	525676	1206	-1	csdB	selenocysteine lyase	K11717	COG0520	E	Selenocysteine lyase
353	CaPaus	YP_001799130	NC_010544	420	552632	553852	1221	-1	csdB	Selenocysteine lyase	K11717	COG0520	E	Selenocysteine lyase
353	CaPmal	YP_002004153	NC_011047	111	150469	151683	1215	-1	csdB	selenocysteine lyase	K11717	COG0520	E	Selenocysteine lyase
354	CaPastA	YP_456498	NC_007716	302	316503	317012	510	1	mutT	MutT/NUDIX family phosphohydrolase	NA	NA	X	NA
354	CaPastO	NP_950728	NC_005303	472	533318	533827	510	-1	mutT	MutT/nudix family protein	NA	NA	X	NA
354	CaPaus	YP_001799335	NC_010544	625	796496	797053	558	1	mutT	NUDIX hydrolase	NA	NA	X	NA
354	CaPmal	YP_002004148	NC_011047	106	144746	145216	471	-1	mutT	MutT/nudix family protein	NA	NA	X	NA
355	CaPastA	YP_456337	NC_007716	141	169208	169546	339	-1	NA	hypothetical protein	NA	NA	X	NA
355	CaPastO	NP_950858	NC_005303	602	684894	685229	336	-1	NA	hypothetical protein	NA	NA	X	NA
355	CaPaus	YP_001799063	NC_010544	353	471336	471659	324	-1	NA	hypothetical protein	NA	NA	X	NA
355	CaPmal	YP_002004184	NC_011047	142	184212	184586	375	1	NA	hypothetical protein	NA	NA	X	NA
356	CaPastA	YP_456311	NC_007716	115	133071	135356	2286	-1	uvrD	UvrD helicase	K03657	COG0210	L	Superfamily I DNA and RNA helicases
356	CaPastO	NP_950873	NC_005303	617	703793	706036	2244	1	uvrD	ATP-dependent DNA helicase	K03657	COG0210	L	Superfamily I DNA and RNA helicases
356	CaPaus	YP_001799268	NC_010544	558	703690	705831	2142	-1	uvrD	ATP-dependent DNA helicase	K03657	COG0210	L	Superfamily I DNA and RNA helicases
356	CaPmal	YP_002004462	NC_011047	420	518910	521036	2127	-1	uvrD	ATP-dependent DNA helicase	K03657	COG0210	L	Superfamily I DNA and RNA helicases
357	CaPastA	YP_456308	NC_007716	112	131751	131924	174	-1	rpsU	30S ribosomal protein S21	K02970	COG0828	J	Ribosomal protein S21
357	CaPastO	NP_950875	NC_005303	619	707185	707358	174	1	rpsU	ribosomal protein S21	K02970	COG0828	J	Ribosomal protein S21
357	CaPaus	YP_001799203	NC_010544	493	614627	614800	174	-1	rpsU	30S ribosomal protein S21	K02970	COG0828	J	Ribosomal protein S21
357	CaPmal	YP_002004333	NC_011047	291	380018	380185	168	1	rpsU	30S ribosomal protein S21	NA	NA	X	NA
358	CaPastA	YP_456303	NC_007716	107	125358	126755	1398	-1	rpoD	RNA polymerase sigma factor RpoD	K03086	COG0568	K	DNA-directed RNA polymerase, sigma subunit (sigma70/sigma32)
358	CaPastO	NP_950880	NC_005303	624	712396	713778	1383	1	rpoD	DNA-directed RNA polymerase sigma subunit	K03086	COG0568	K	DNA-directed RNA polymerase, sigma subunit (sigma70/sigma32)
358	CaPaus	YP_001799198	NC_010544	488	608288	609718	1431	-1	rpoD	RNA polymerase sigma factor	K03086	COG0568	K	DNA-directed RNA polymerase, sigma subunit (sigma70/sigma32)
358	CaPmal	YP_002004339	NC_011047	297	385627	386886	1260	1	rpoD	RNA polymerase sigma factor RpoD	K03086	COG0568	K	DNA-directed RNA polymerase, sigma subunit (sigma70/sigma32)
359	CaPastA	YP_456302	NC_007716	106	124913	125356	444	-1	NA	hypothetical protein	NA	NA	X	NA
359	CaPastO	NP_950881	NC_005303	625	713780	714223	444	1	NA	hypothetical protein	NA	NA	X	NA
359	CaPaus	YP_001799197	NC_010544	487	607835	608278	444	-1	NA	hypothetical protein	NA	NA	X	NA
359	CaPmal	YP_002004340	NC_011047	298	387731	388024	294	1	NA	hypothetical protein	NA	NA	X	NA
360	CaPastA	YP_456292	NC_007716	96	109287	111041	1755	1	hflB	ATP-dependent zinc metallopeptidase FtsH	NA	NA	X	NA
360	CaPastO	NP_950910	NC_005303	653	744430	746226	1797	-1	hflB	ATP-dependent Zn protease	NA	NA	X	NA
360	CaPaus	YP_001798814	NC_010544	104	157496	159247	1752	1	NA	Putative peptidase	NA	NA	X	NA
360	CaPmal	YP_002004413	NC_011047	371	458152	459969	1818	1	hflB	ATP-dependent Zn protease	NA	NA	X	NA
361	CaPastA	YP_456266	NC_007716	70	83961	84185	225	-1	cspC	cold shock protein	K03704	COG1278	K	Cold shock proteins
361	CaPastO	NP_950923	NC_005303	666	761965	762189	225	1	cspC	cold shock protein	K03704	COG1278	K	Cold shock proteins
361	CaPaus	YP_001799375	NC_010544	665	845290	845523	234	1	csp	cold shock protein	K03704	COG1278	K	Cold shock proteins
361	CaPmal	YP_002004328	NC_011047	286	374104	374361	258	1	cspJ	cold shock-like protein	K03704	COG1278	K	Cold shock proteins
362	CaPastA	YP_456390	NC_007716	194	214764	215390	627	-1	rpoD	RNA polymerase sigma factor	NA	NA	X	NA
362	CaPastA	YP_456555	NC_007716	359	380160	380786	627	1	rpoD	RNA polymerase sigma factor	NA	NA	X	NA
362	CaPastO	NP_950954	NC_005303	697	792597	793223	627	-1	rpoD	DNA-directed RNA polymerase sigma subunit	NA	NA	X	NA
362	CaPastO	YP_002154420	NC_005303	424	468879	469505	627	-1	rpoD	DNA-directed RNA polymerase sigma subunit	NA	NA	X	NA
363	CaPastA	YP_456850	NC_007716	654	684624	684869	246	-1	rpoZ	DNA-directed RNA polymerase omega chain	K03060	COG1758	K	DNA-directed RNA polymerase, subunit K/omega
363	CaPastO	NP_950988	NC_005303	731	831894	832091	198	-1	rpoZ	DNA-directed RNA polymerase subunit K/omega	K03060	COG1758	K	DNA-directed RNA polymerase, subunit K/omega
363	CaPaus	YP_001798785	NC_010544	75	115717	115923	207	1	rpoZ	Putative DNA-directed RNA polymerase,omega subunit	K03060	COG1758	K	DNA-directed RNA polymerase, subunit K/omega
363	CaPmal	YP_002004476	NC_011047	434	534173	534388	216	1	rpoZ	DNA-directed RNA polymerase subunit omega	K03060	COG1758	K	DNA-directed RNA polymerase, subunit K/omega
364	CaPastA	YP_456861	NC_007716	665	696828	698210	1383	-1	trmE	tRNA modification GTPase TrmE	K03650	COG0486	R	Predicted GTPase
364	CaPastO	NP_950999	NC_005303	742	842877	844259	1383	-1	thdF	tRNA modification GTPase	K03650	COG0486	R	Predicted GTPase
364	CaPaus	YP_001798727	NC_010544	17	24023	25384	1362	-1	trmE	tRNA modification GTPase TrmE	K03650	COG0486	R	Predicted GTPase
364	CaPmal	YP_002004204	NC_011047	162	210069	211427	1359	1	trmE	tRNA modification GTPase TrmE	K03650	COG0486	R	Predicted GTPase
365	CaPaus	YP_001798754	NC_010544	44	69145	70317	1173	-1	NA	Putative phage integrase	K07497	COG2801	L	Transposase and inactivated derivatives
365	CaPaus	YP_001798876	NC_010544	166	244143	245315	1173	1	NA	Putative phage integrase	K07497	COG2801	L	Transposase and inactivated derivatives
365	CaPaus	YP_001799000	NC_010544	290	395386	396555	1170	1	NA	Putative phage integrase	K07497	COG2801	L	Transposase and inactivated derivatives
365	CaPaus	YP_001799352	NC_010544	642	816672	817844	1173	-1	NA	Putative phage integrase	K07497	COG2801	L	Transposase and inactivated derivatives
366	PNWB_v1	c0220	Contig1A	13	19731	20366	636	-1	NA	putative effector	NA	NA	X	NA
366	PNWB_v1	c0720	Contig1C	4	5484	6191	708	1	NA	putative effector	NA	NA	X	NA
366	PNWB_v1	c0760	Contig1C	8	11190	11831	642	1	NA	putative effector	NA	NA	X	NA
367	CaPaus	YP_001799231	NC_010544	521	649180	649650	471	1	gepA	phage-associated protein	NA	NA	X	NA
367	CaPmal	YP_002004293	NC_011047	251	332888	333361	474	1	NA	hypothetical protein	NA	NA	X	NA
367	PNWB_v1	c0330	Contig1B	1	342	803	462	1	gepA	phage-associated protein	NA	NA	X	NA
368	CaPastA	YP_456454	NC_007716	258	268010	268243	234	1	NA	hypothetical protein	NA	NA	X	NA
368	CaPaus	YP_001799065	NC_010544	355	473427	473939	513	-1	NA	hypothetical protein	NA	NA	X	NA
368	PNWB_v1	c0420	Contig1B	7	9340	9825	486	1	NA	putative effector, AYWB SAP42-like protein	NA	NA	X	NA
369	CaPastO	NP_950844	NC_005303	588	668644	669240	597	1	NA	hypothetical protein	NA	NA	X	NA
369	CaPaus	YP_001799332	NC_010544	622	793934	794257	324	1	NA	hypothetical protein	NA	NA	X	NA
369	PNWB_v1	c0730	Contig1C	5	6638	7141	504	1	NA	hypothetical protein	NA	NA	X	NA
370	CaPastO	NP_950349	NC_005303	97	123489	124316	828	1	nlpA	ABC transporter periplasmic component	NA	NA	X	NA
370	CaPaus	YP_001799053	NC_010544	343	455152	455985	834	1	nlpA	ABC-type uncharacterized transport system, periplasmic component	NA	NA	X	NA
370	PNWB_v1	c1030	Contig1D	2	1832	2701	870	-1	nlpA2	ABC-type uncharacterized transport system, periplasmic component	NA	NA	X	NA
371	CaPastO	NP_950969	NC_005303	712	809376	809729	354	-1	NA	hypothetical protein	K03553	COG0468	L	RecA/RadA recombinase
371	CaPmal	YP_002004175	NC_011047	133	173617	174636	1020	1	recA	recombinase A	K03553	COG0468	L	RecA/RadA recombinase
371	PNWB_v1	c1360	Contig1G	15	22172	23185	1014	-1	recA	recombinase A	K03553	COG0468	L	RecA/RadA recombinase
372	CaPastO	NP_950443	NC_005303	191	231479	233050	1572	-1	oppA	ABC-type dipeptide/oligopeptide transport system, periplasmic component	K02035	COG0747	E	ABC-type dipeptide transport system, periplasmic component
372	CaPaus	YP_001799316	NC_010544	606	768393	769952	1560	1	NA	ABC-type peptide/nickel transport system substrate-binding protein	K02035	COG0747	E	ABC-type dipeptide transport system, periplasmic component
372	PNWB_v1	c1960	Contig1H	10	11358	13004	1647	-1	dppA	ABC-type peptide/nickel transport system, substrate-binding protein	K02035	COG0747	E	ABC-type dipeptide transport system, periplasmic component
373	CaPastA	YP_456854	NC_007716	658	688668	689738	1071	-1	ysdC	endo-1,4-beta-glucanase	K01179	COG3405	G	Endoglucanase Y
373	CaPastO	NP_950992	NC_005303	735	835931	836995	1065	-1	frvX	endo-1,4-beta-glucanase	K01179	COG3405	G	Endoglucanase Y
373	PNWB_v1	c2140	Contig1H	24	35405	36466	1062	-1	ysdC	endo-1,4-beta-glucanase	K01179	COG3405	G	Endoglucanase Y
374	CaPastA	YP_456664	NC_007716	468	487231	487938	708	-1	spoU	23S rRNA methyltransferase	K03218	COG0566	J	rRNA methylases
374	CaPaus	YP_001799247	NC_010544	537	672761	673462	702	-1	yacO	tRNA/rRNA methyltransferase	K03218	COG0566	J	rRNA methylases
374	PNWB_v1	c2310	Contig1H	41	55756	56478	723	-1	rlmB	23S rRNA methyltransferase	K03218	COG0566	J	rRNA methylases
375	CaPaus	YP_001799109	NC_010544	399	515444	521524	6081	1	NA	Putative peptidase M41 cell division protein, fragment	NA	NA	X	NA
375	CaPmal	YP_002004486	NC_011047	442	551011	552117	1107	-1	hflB	ATP-dependent Zn protease	NA	NA	X	NA
[truncated: 1,005 more rows]
